# Supplementary material for: Aromatic hydroxylation of substituted benzenes by an unspecific peroxygenase from Aspergillus brasiliensis
Source: Royal Society of Chemistry journal article supplement (doi:10.1039/d3re00209h), 2023-01-01
Supplement: d3re00209h1.pdf [file d3re00209h1.pdf]

## Electronic Supplementary Information

### Aromatic hydroxylation of substituted benzenes by an unspecific peroxygenase from *Aspergillus brasiliensis*

Fabian Schmitz <sup>a</sup>, Katja Koschorreck <sup>a</sup>, Frank Hollmann <sup>b</sup> and Vlada B. Urlacher <sup>\*a</sup>

<sup>a</sup>Institute of Biochemistry, Heinrich-Heine-University Düsseldorf, Universitätsstraße 1, 40225 Düsseldorf, Germany.

<sup>b</sup>Department of Biotechnology, Delft University of Technology, Julianalaan 136, 2628BL Delft, Netherlands

\*Corresponding author: [vlada.urlacher@uni-duesseldorf.de](mailto:vlada.urlacher@uni-duesseldorf.de)

### Table of contents

|     |                                                                    |    |
|-----|--------------------------------------------------------------------|----|
| 1   | Material & Methods .....                                           | 2  |
| 1.1 | Fed-batch process .....                                            | 2  |
| 1.2 | LC/MS elution profile for detection of 23 .....                    | 2  |
| 2   | Results .....                                                      | 3  |
| 2.1 | Recombinant expression and characterization of <i>AbrUPO</i> ..... | 3  |
| 2.2 | Catalytic activity of <i>AbrUPO</i> .....                          | 6  |
| 3   | GCMS chromatograms .....                                           | 11 |
| 4   | References .....                                                   | 62 |

# 1 Material & Methods

## 1.1 Fed-batch process

*P. pastoris* X-33::pPICZA\_AbrUPO was chosen for fed-batch fermentation in a 7.5 l bioreactor (Infors, Bottmingen, Switzerland). A total of 3 l basal salt medium (per 1 l: 0.47 g CaSO<sub>4</sub> x 2 H<sub>2</sub>O, 8 ml H<sub>3</sub>PO<sub>4</sub> (85 %), 9.1 g K<sub>2</sub>SO<sub>4</sub>, 4.2 g KOH, 3.66 g MgSO<sub>4</sub>, 43.5 g glycerol (100 %), supplemented with 0.87 mg biotin, 4.35 ml *Pichia* trace metals (per 1 l of PTM<sub>1</sub> solution: 6 g CuSO<sub>4</sub> x 5 H<sub>2</sub>O, 0.08 g NaI, 3 g MnSO<sub>4</sub> x H<sub>2</sub>O, 0.5 g CoCl<sub>2</sub>, 20 g ZnCl<sub>2</sub>, 0.02 g H<sub>3</sub>BO<sub>3</sub>, 0.2 g Na<sub>2</sub>Mo<sub>4</sub> x 2 H<sub>2</sub>O, 65 g FeSO<sub>4</sub> x 7 H<sub>2</sub>O, 0.2 g biotin, 5 ml H<sub>2</sub>SO<sub>4</sub>) was inoculated to an OD<sub>600</sub> of 0.5 from a preculture. The preculture was grown overnight at 30 °C and 200 rpm in 200 ml BMGY containing 100 µg/ml Zeocin™, and the cells were washed with sterile 0.9 % sodium chloride solution before inoculation of the fermenter. During the entire fermentation, the pH was kept at pH 5.0 by titrating 10 % phosphoric acid and 25 % ammonium hydroxide. The stirring rate was set at 800 rpm and the oxygen was supplied with 3 l/min. Until the primary carbon source glycerol was completely consumed, the temperature was set to 30 °C. Afterwards 0.5 % (v/v) MeOH with 12 g/l PTM<sub>1</sub> solution was added as carbon source and as inducer for the gene expression, and the temperature was reduced to 25 °C. Additionally, 10 µM hemin was added to allow efficient loading of AbrUPO. 0.5 % (v/v) MeOH was automatically added when MeOH in the fermentation broth was consumed as indicated by a spike in dissolved oxygen. After 9 days, the cells were harvested (11,325 x g, 4 °C, 20 min). The volumetric activity towards ABTS, OD<sub>600</sub> and protein concentration were determined at different time points throughout the whole fermentation.

## 1.2 LC/MS elution profile for detection of 23

Conversion of **23** was analysed by liquid chromatography coupled to mass spectrometry (LC/MS) on a Prominence/LCMS2020 device (Shimadzu) like described before.<sup>1</sup> A Chromolith® Performance RP-18e column (100x4.6 mm, Merck) was used. Solvent A was ddH<sub>2</sub>O with 0.1% formic acid, while solvent B was methanol. 1 µl of each sample was injected and separated with a flow rate of 1 ml min<sup>-1</sup> at 30 °C. The substances were ionized by electron spray ionization (ESI) and atmospheric pressure chemical ionization (APCI) in dual ionization mode. Mass fragments were detected in positive and negative scan mode in a range of 100-500 m/z.

|           |                                                                                                     |
|-----------|-----------------------------------------------------------------------------------------------------|
| <b>23</b> | Gradient from 10 % B to 75 % B for 10 min, hold 75 % B for 5 min, equilibration at 10 % B for 5 min |
|-----------|-----------------------------------------------------------------------------------------------------|

Table S1: Temperature profiles of the GC/MS programmes

| Compound              | Temperature profile                                                                                                                                                 |
|-----------------------|---------------------------------------------------------------------------------------------------------------------------------------------------------------------|
| <b>1-3, 5-6</b>       | Maintained at 80 °C for 5 min, ramped to 250 °C at 20 °C min <sup>-1</sup> , held for 2 min                                                                         |
| <b>4, 7, 8-10, 14</b> | Maintained at 100 °C for 1 min, ramped to 150 °C at 5 °C min <sup>-1</sup> , held for 1 min, ramped to 250 °C at 20 °C min <sup>-1</sup> , held at 250 °C for 1 min |
| <b>11-13</b>          | Maintained at 70 °C for 2 min, ramped to 100 °C at 5 °C min <sup>-1</sup> , ramped to 250 °C at 15 °C min <sup>-1</sup> , held at 250 °C for 2 min                  |

|              |                                                                                                                                                                                                                                     |
|--------------|-------------------------------------------------------------------------------------------------------------------------------------------------------------------------------------------------------------------------------------|
| <b>15</b>    | Maintained at 130 °C for 2 min, ramped to 300 °C at 20 °C min <sup>-1</sup> , held at 300 °C for 8 min                                                                                                                              |
| <b>16</b>    | Maintained at 120 °C for 1.5 min, ramped to 180 °C at 5 °C min <sup>-1</sup> , held for 1 min, ramped to 200 °C at 10 °C min <sup>-1</sup> , held for 1 min, ramped to 300 °C at 20 °C min <sup>-1</sup> , held at 300 °C for 1 min |
| <b>17-18</b> | Maintained at 40 °C, ramped to 300 °C at 5 °C min <sup>-1</sup> , held at 300 °C for 2 min                                                                                                                                          |
| <b>19-20</b> | Maintained at 90 °C for 5 min, ramped to 320 °C at 15 °C min <sup>-1</sup> , held at 320 °C for 5 min                                                                                                                               |
| <b>21</b>    | Maintained at 80 °C for 3 min, ramped to 300 °C at 15 °C min <sup>-1</sup> , held at 300 °C for 2 min                                                                                                                               |
| <b>22</b>    | Maintained at 200 °C for 4 min, ramped to 300 °C at 10 °C min <sup>-1</sup> held for 4 min, ramped to 320 °C at 5 °C min <sup>-1</sup> , held at 320 °C for 2 min                                                                   |
| <b>24</b>    | Maintained at 120°C for 1 min, ramped to 210°C at 10°C min <sup>-1</sup> , ramped to 300°C at 40°C min <sup>-1</sup> , held at 300°C for 1 min.                                                                                     |
| <b>25-27</b> | Maintained at 150°C for 1 min, ramped to 260°C at 10 °C min <sup>-1</sup> , ramped to 300°C at 40 °C min <sup>-1</sup> , held at 300°C for 3 min.                                                                                   |

## 2 Results

### 2.1 Recombinant expression and characterization of *AbrUPO*

Table S2: Purification of recombinant *AbrUPO*

|                                     | Spec. activity [U/mg] | Total Units <sup>c</sup> [U] | Yield <sup>d</sup> [%] <sup>a</sup> | Purification factor [x-fold] | Protein concentration [mg/ml] <sup>e</sup> | Volume [l] |
|-------------------------------------|-----------------------|------------------------------|-------------------------------------|------------------------------|--------------------------------------------|------------|
| <b>Supernatant <sup>a</sup></b>     | 18.17 ± 1.5           | 93,970                       | (100)                               | 1.0                          | 1.29                                       | 4.6        |
| <b>Ultrafiltration <sup>b</sup></b> | 20.30 ± 0.9           | 39,467                       | 100                                 | 1.1                          | 8.84                                       | 0.22       |
| <b>HIC</b>                          | 22.7 ± 3.0            | 191                          | 11                                  | 1.2                          | 7.02                                       | 0.0012     |
| <b>IEX</b>                          | 31.7 ± 1.4            | 170                          | 9.7                                 | 1.7                          | 5.36                                       | 0.001      |

<sup>a</sup> Cell-free supernatant after fed-batch fermentation

<sup>b</sup> Ultrafiltration retentate of supernatant using tangential flow filtration (TFF). Concentrated sample was collected in three steps (eluates) with different enzyme activities and protein concentrations.

<sup>c</sup> Enzyme activity was determined with ABTS

<sup>d</sup> Yield based on the enzyme applied to HIC

<sup>e</sup> Protein concentration was determined with Bradford assay

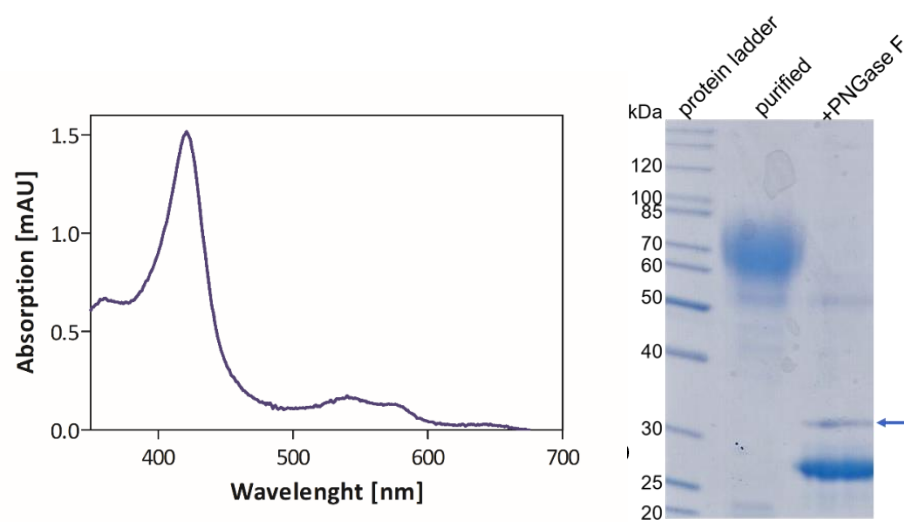

**Figure S1:** left - UV-VIS spectrum of 1  $\mu$ M purified *AbrUPO*, right - SDS-PAGE analysis of purified and PNGase F treated *AbrUPO* using a 12.5 % resolving gel. Blue Arrow indicates PNGase F (36 kDa).

**Table S3: N-glycosylation degree of different UPOs**

| Name            | Expression host            | N-glycosylation [%] | Reference |
|-----------------|----------------------------|---------------------|-----------|
| <i>AbrUPO</i>   | <i>P. pastoris</i>         | ~55                 | This work |
| <i>rAaeUPO</i>  | <i>P. pastoris</i>         | 30                  | 2         |
| <i>rAniUPO</i>  | <i>P. pastoris</i>         | 50                  | 3         |
| <i>rCabUPO1</i> | <i>P. pastoris</i>         | ~14                 | 3         |
| <i>rCciUPO</i>  | <i>Aspergillus oryzae</i>  | 14-44               | 4         |
| <i>CglUPO</i>   | <i>Chaetomium globosum</i> | 19                  | 5         |
| <i>CraUPO</i>   | <i>Coprinus radians</i>    | 37                  | 6         |
| <i>HspUPO</i>   | <i>P. pastoris</i>         | ~50                 | 7         |
| <i>MroUPO</i>   | <i>Marasmius rotula</i>    | 16                  | 8         |

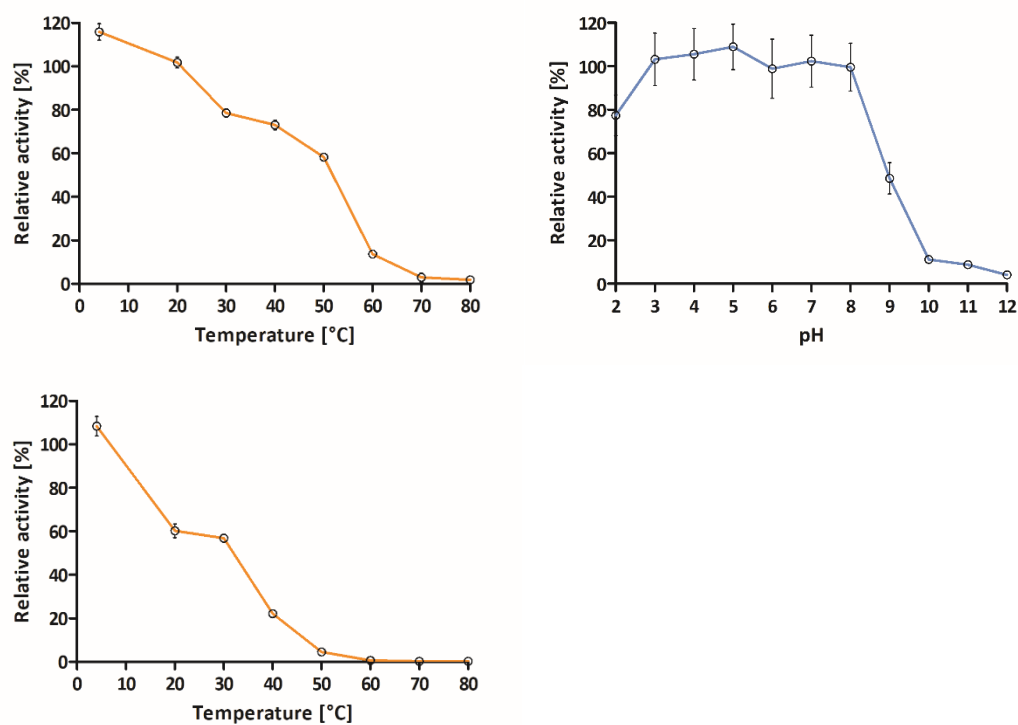

**Figure S2: Determination of  $T_{50}$  (left upper), thermal stability after 240 min (left lower) and pH stability (right).** Residual activity of *AbrUPO* dissolved in 50 mM sodium phosphate buffer pH 7.0, 2 mM  $MgCl_2$  after 10 min (upper) or 240 min (lower) incubation at temperatures between 4 - 80 °C. For pH stability, residual activity of *AbrUPO* after 60 min incubation in 100 mM Britton-Robinson buffer in a pH range between 2 to 12 was measured.

## 2.2 Catalytic activity of *AbrUPO*

**Table S4: Further substrates of *AbrUPO*:** Reactions were conducted in 50 mM sodium phosphate pH 7.0 with 2 mM MgCl<sub>2</sub>, 1 mM substrate, 4 mM hydrogen peroxide, 1.3 μM *AbrUPO*, 8 mM ascorbic acid at 25 °C and 600 rpm for 180 min.

| Compound                | Structure                                                                           | Substrate depletion [%] |
|-------------------------|-------------------------------------------------------------------------------------|-------------------------|
| 17 Thioanisole          | 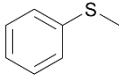   | >99                     |
| 18 Butyl methyl sulfide | 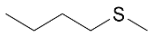   | >99                     |
| 19 α-Pinene             | 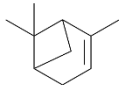   | 84                      |
| 20 (1S)-(-)-Verbenone   | 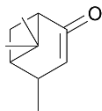   | 14                      |
| 21 (1R)-(+)-Camphor     | 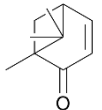  | n. d.                   |
| 22 Valencene            | 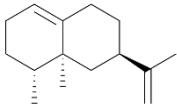 | n. d.                   |
| 23 Testosterone         | 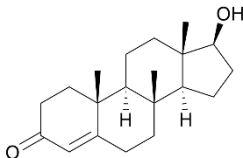 | 10                      |

n. d. = not detected

**Table S5: Product distribution for fatty acids:** Reactions were conducted in 50 mM sodium phosphate pH 7.0 with 2 mM MgCl<sub>2</sub>, 200  $\mu$ M substrate, 500  $\mu$ M hydrogen peroxide, 0.8  $\mu$ M *AbrUPO* at 25 °C and 600 rpm for 180 min.

|                                                                                                                                                                                                                                                                                                                                                                                                                                                                                                                                                                                                                                                                                                                                                                                                                                                                                                                                                                                                                                                                                                                                                                                                                                                                                                                                                                                                                                                                                                                                                                                                                                                                                                                                                                                                                                                                                                                                                                                                                                                                                                                                                                                                                                                                                                                                                                                                                                                                                                                                                                                                                                                                                                                                                                                                                                                                                                                                                                                                                                                                                                                                                                                                                                                                                                                                                                                                                                                                                                                                                                                                                                                                                                                                                                                                                                                                                                                                                                                                                                                                                                                                                                                                                                                                                                                                                                                                                                                                                                                                                                                                                                                                                                                                                                                                                                                                                                                                                                                                                                                                                                                                                                                                                                                                                                                                                                                                                                                                                                                                                                                                                                                                                                                                                                                                                                                                                                                                                                                                                                                                                                                                                                                                                                                                                                                                                                                                                                                                                                                                                                                                                                                                                                                                                                                                                                                                                                                                                                                                                                                                                                                                                                                                                                                                                                                                                                                                                                                                                                                                                                                                                                                                                                                                                                                                                                                                                                                                                                                                                                                                                                                                                                                                                                                                                                                                                                                                                                                                                                                                                                                                                                                                                                                                                                                                                                                                                                                                                                                                                                                                                                                                                                                                                                                                                                                                                                                                                                                                                                                                                                                                                                                                                                                                                                                                                                                                                                                                                                                                                                                                                                                                                                                                                                                                                                                                                                                                                                                                                                                                                                                                                                                                                                                                                                                                                                                                                                                                                                                                                                                                                                                                                                                                                                                                                                                                                                                                                                                                                                                                                                                                                                                                                                                                                                                                                                                                                                                                                                                                                                                                                                                                                                                                                                                                                                                                                                                                                                                                                                                                                                                                                                                                                                                                                                                                                                                                                                                                                                                                                                                                                                                                                                                                                                                                                                                                                                                                                                                                                                                                                                                                                                                                                                                                                                                                                                                                                                                                                                                                                                                                                                                                                                                                                                                                                                                                                                                                                                                                                                                                                                                                                                                                                                                                                                                                                                                                                                                                                                                                                                                                                                                                                                                                                                                                                                                                                                                                                                                                                                                                                                                                                                                                                                                                                                                                                                                                                                                                                                                                                                                                                                                                                                                                                                                                                                                                                                                                                                                                                                                                                                                                                                                                                                                                                                                                                                                                                                                                                                                                                                                                                                                                                                                 |
|---------------------------------------------------------------------------------------------------------------------------------------------------------------------------------------------------------------------------------------------------------------------------------------------------------------------------------------------------------------------------------------------------------------------------------------------------------------------------------------------------------------------------------------------------------------------------------------------------------------------------------------------------------------------------------------------------------------------------------------------------------------------------------------------------------------------------------------------------------------------------------------------------------------------------------------------------------------------------------------------------------------------------------------------------------------------------------------------------------------------------------------------------------------------------------------------------------------------------------------------------------------------------------------------------------------------------------------------------------------------------------------------------------------------------------------------------------------------------------------------------------------------------------------------------------------------------------------------------------------------------------------------------------------------------------------------------------------------------------------------------------------------------------------------------------------------------------------------------------------------------------------------------------------------------------------------------------------------------------------------------------------------------------------------------------------------------------------------------------------------------------------------------------------------------------------------------------------------------------------------------------------------------------------------------------------------------------------------------------------------------------------------------------------------------------------------------------------------------------------------------------------------------------------------------------------------------------------------------------------------------------------------------------------------------------------------------------------------------------------------------------------------------------------------------------------------------------------------------------------------------------------------------------------------------------------------------------------------------------------------------------------------------------------------------------------------------------------------------------------------------------------------------------------------------------------------------------------------------------------------------------------------------------------------------------------------------------------------------------------------------------------------------------------------------------------------------------------------------------------------------------------------------------------------------------------------------------------------------------------------------------------------------------------------------------------------------------------------------------------------------------------------------------------------------------------------------------------------------------------------------------------------------------------------------------------------------------------------------------------------------------------------------------------------------------------------------------------------------------------------------------------------------------------------------------------------------------------------------------------------------------------------------------------------------------------------------------------------------------------------------------------------------------------------------------------------------------------------------------------------------------------------------------------------------------------------------------------------------------------------------------------------------------------------------------------------------------------------------------------------------------------------------------------------------------------------------------------------------------------------------------------------------------------------------------------------------------------------------------------------------------------------------------------------------------------------------------------------------------------------------------------------------------------------------------------------------------------------------------------------------------------------------------------------------------------------------------------------------------------------------------------------------------------------------------------------------------------------------------------------------------------------------------------------------------------------------------------------------------------------------------------------------------------------------------------------------------------------------------------------------------------------------------------------------------------------------------------------------------------------------------------------------------------------------------------------------------------------------------------------------------------------------------------------------------------------------------------------------------------------------------------------------------------------------------------------------------------------------------------------------------------------------------------------------------------------------------------------------------------------------------------------------------------------------------------------------------------------------------------------------------------------------------------------------------------------------------------------------------------------------------------------------------------------------------------------------------------------------------------------------------------------------------------------------------------------------------------------------------------------------------------------------------------------------------------------------------------------------------------------------------------------------------------------------------------------------------------------------------------------------------------------------------------------------------------------------------------------------------------------------------------------------------------------------------------------------------------------------------------------------------------------------------------------------------------------------------------------------------------------------------------------------------------------------------------------------------------------------------------------------------------------------------------------------------------------------------------------------------------------------------------------------------------------------------------------------------------------------------------------------------------------------------------------------------------------------------------------------------------------------------------------------------------------------------------------------------------------------------------------------------------------------------------------------------------------------------------------------------------------------------------------------------------------------------------------------------------------------------------------------------------------------------------------------------------------------------------------------------------------------------------------------------------------------------------------------------------------------------------------------------------------------------------------------------------------------------------------------------------------------------------------------------------------------------------------------------------------------------------------------------------------------------------------------------------------------------------------------------------------------------------------------------------------------------------------------------------------------------------------------------------------------------------------------------------------------------------------------------------------------------------------------------------------------------------------------------------------------------------------------------------------------------------------------------------------------------------------------------------------------------------------------------------------------------------------------------------------------------------------------------------------------------------------------------------------------------------------------------------------------------------------------------------------------------------------------------------------------------------------------------------------------------------------------------------------------------------------------------------------------------------------------------------------------------------------------------------------------------------------------------------------------------------------------------------------------------------------------------------------------------------------------------------------------------------------------------------------------------------------------------------------------------------------------------------------------------------------------------------------------------------------------------------------------------------------------------------------------------------------------------------------------------------------------------------------------------------------------------------------------------------------------------------------------------------------------------------------------------------------------------------------------------------------------------------------------------------------------------------------------------------------------------------------------------------------------------------------------------------------------------------------------------------------------------------------------------------------------------------------------------------------------------------------------------------------------------------------------------------------------------------------------------------------------------------------------------------------------------------------------------------------------------------------------------------------------------------------------------------------------------------------------------------------------------------------------------------------------------------------------------------------------------------------------------------------------------------------------------------------------------------------------------------------------------------------------------------------------------------------------------------------------------------------------------------------------------------------------------------------------------------------------------------------------------------------------------------------------------------------------------------------------------------------------------------------------------------------------------------------------------------------------------------------------------------------------------------------------------------------------------------------------------------------------------------------------------------------------------------------------------------------------------------------------------------------------------------------------------------------------------------------------------------------------------------------------------------------------------------------------------------------------------------------------------------------------------------------------------------------------------------------------------------------------------------------------------------------------------------------------------------------------------------------------------------------------------------------------------------------------------------------------------------------------------------------------------------------------------------------------------------------------------------------------------------------------------------------------------------------------------------------------------------------------------------------------------------------------------------------------------------------------------------------------------------------------------------------------------------------------------------------------------------------------------------------------------------------------------------------------------------------------------------------------------------------------------------------------------------------------------------------------------------------------------------------------------------------------------------------------------------------------------------------------------------------------------------------------------------------------------------------------------------------------------------------------------------------------------------------------------------------------------------------------------------------------------------------------------------------------------------------------------------------------------------------------------------------------------------------------------------------------------------------------------------------------------------------------------------------------------------------------------------------------------------------------------------------------------------------------------------------------------------------------------------------------------------------------------------------------------------------------------------------------------------------------------------------------------------------------------------------------------------------------------------------------------------------------------------------------------------------------------------------------------------------------------------------------------------------------------------------------------------------------------------------------------------------------------------------------------------------------------------------------------------------------------------------------------------------------------------------------------------------------------------------------------------------------------------------------------------------------------------------------------------------------------------------------------------------------------------------------------------------------------------------------------------------------------------------------------------------------------------------------------------------------------------------------------------------------------------------------------------------------------------------------------------------------------------------------------------------------------------------------------------------------------------------------------------------------------------------------------------------------------------------------------------------------------------------------------------------------------------------------------------------------------------------------------------------------------------------------------------------------------------------------------------------------------------------------------------------------------------------------------------------------------------------------------------------------------------------------------------------------------------------------------------------------------------------------------------------------------------------------------------------------------------------------------------------------------------------------------------------------------|
| <div><div><div><div><div><div></div><div>HO</div></div><div><div><div><div><div></div><div></div><div></div></div><div><div><div><div></div><div></div><div></div></div></div><div><div><div><div></div><div></div><div></div></div></div><div><div><div><div></div><div></div><div></div></div></div><div><div><div><div></div><div></div><div></div></div></div><div><div><div><div></div><div></div><div></div></div></div><div><div><div><div></div><div></div><div></div></div></div><div><div><div><div></div><div></div><div></div></div></div><div><div><div><div></div><div></div><div></div></div></div><div><div><div><div></div><div></div><div></div></div></div><div><div><div><div></div><div></div><div></div></div></div><div><div><div><div></div><div></div><div></div></div></div><div><div><div><div></div><div></div><div></div></div></div><div><div><div><div></div><div></div><div></div></div></div><div><div><div><div></div><div></div><div></div></div></div><div><div><div><div></div><div></div><div></div></div></div><div><div><div><div></div><div></div><div></div></div></div><div><div><div><div></div><div></div><div></div></div></div><div><div><div><div></div><div></div><div></div></div></div><div><div><div><div></div><div></div><div></div></div></div><div><div><div><div></div><div></div><div></div></div></div><div><div><div><div></div><div></div><div></div></div></div><div><div><div><div></div><div></div><div></div></div></div><div><div><div><div></div><div></div><div></div></div></div><div><div><div><div></div><div></div><div></div></div></div><div><div><div><div></div><div></div><div></div></div></div><div><div><div><div></div><div></div><div></div></div></div><div><div><div><div></div><div></div><div></div></div></div><div><div><div><div></div><div></div><div></div></div></div><div><div><div><div></div><div></div><div></div></div></div><div><div><div><div></div><div></div><div></div></div></div><div><div><div><div></div><div></div><div></div></div></div><div><div><div><div></div><div></div><div></div></div></div><div><div><div><div></div><div></div><div></div></div></div><div><div><div><div></div><div></div><div></div></div></div><div><div><div><div></div><div></div><div></div></div></div><div><div><div><div></div><div></div><div></div></div></div><div><div><div><div></div><div></div><div></div></div></div><div><div><div><div></div><div></div><div></div></div></div><div><div><div><div></div><div></div><div></div></div></div><div><div><div><div></div><div></div><div></div></div></div><div><div><div><div></div><div></div><div></div></div></div><div><div><div><div></div><div></div><div></div></div></div><div><div><div><div></div><div></div><div></div></div></div><div><div><div><div></div><div></div><div></div></div></div><div><div><div><div></div><div></div><div></div></div></div><div><div><div><div></div><div></div><div></div></div></div><div><div><div><div></div><div></div><div></div></div></div><div><div><div><div></div><div></div><div></div></div></div><div><div><div><div></div><div></div><div></div></div></div><div><div><div><div></div><div></div><div></div></div></div><div><div><div><div></div><div></div><div></div></div></div><div><div><div><div></div><div></div><div></div></div></div><div><div><div><div></div><div></div><div></div></div></div><div><div><div><div></div><div></div><div></div></div></div><div><div><div><div></div><div></div><div></div></div></div><div><div><div><div></div><div></div><div></div></div></div><div><div><div><div></div><div></div><div></div></div></div><div><div><div><div></div><div></div><div></div></div></div><div><div><div><div></div><div></div><div></div></div></div><div><div><div><div></div><div></div><div></div></div></div><div><div><div><div></div><div></div><div></div></div></div><div><div><div><div></div><div></div><div></div></div></div><div><div><div><div></div><div></div><div></div></div></div><div><div><div><div></div><div></div><div></div></div></div><div><div><div><div></div><div></div><div></div></div></div><div><div><div><div></div><div></div><div></div></div></div><div><div><div><div></div><div></div><div></div></div></div><div><div><div><div></div><div></div><div></div></div></div><div><div><div><div></div><div></div><div></div></div></div><div><div><div><div></div><div></div><div></div></div></div><div><div><div><div></div><div></div><div></div></div></div><div><div><div><div></div><div></div><div></div></div></div><div><div><div><div></div><div></div><div></div></div></div><div><div><div><div></div><div></div><div></div></div></div><div><div><div><div></div><div></div><div></div></div></div><div><div><div><div></div><div></div><div></div></div></div><div><div><div><div></div><div></div><div></div></div></div><div><div><div><div></div><div></div><div></div></div></div><div><div><div><div></div><div></div><div></div></div></div><div><div><div><div></div><div></div><div></div></div></div><div><div><div><div></div><div></div><div></div></div></div><div><div><div><div></div><div></div><div></div></div></div><div><div><div><div></div><div></div><div></div></div></div><div><div><div><div></div><div></div><div></div></div></div><div><div><div><div></div><div></div><div></div></div></div><div><div><div><div></div><div></div><div></div></div></div><div><div><div><div></div><div></div><div></div></div></div><div><div><div><div></div><div></div><div></div></div></div><div><div><div><div></div><div></div><div></div></div></div><div><div><div><div></div><div></div><div></div></div></div><div><div><div><div></div><div></div><div></div></div></div><div><div><div><div></div><div></div><div></div></div></div><div><div><div><div></div><div></div><div></div></div></div><div><div><div><div></div><div></div><div></div></div></div><div><div><div><div></div><div></div><div></div></div></div><div><div><div><div></div><div></div><div></div></div></div><div><div><div><div></div><div></div><div></div></div></div><div><div><div><div></div><div></div><div></div></div></div><div><div><div><div></div><div></div><div></div></div></div><div><div><div><div></div><div></div><div></div></div></div><div><div><div><div></div><div></div><div></div></div></div><div><div><div><div></div><div></div><div></div></div></div><div><div><div><div></div><div></div><div></div></div></div><div><div><div><div></div><div></div><div></div></div></div><div><div><div><div></div><div></div><div></div></div></div><div><div><div><div></div><div></div><div></div></div></div><div><div><div><div></div><div></div><div></div></div></div><div><div><div><div></div><div></div><div></div></div></div><div><div><div><div></div><div></div><div></div></div></div><div><div><div><div></div><div></div><div></div></div></div><div><div><div><div></div><div></div><div></div></div></div><div><div><div><div></div><div></div><div></div></div></div><div><div><div><div></div><div></div><div></div></div></div><div><div><div><div></div><div></div><div></div></div></div><div><div><div><div></div><div></div><div></div></div></div><div><div><div><div></div><div></div><div></div></div></div><div><div><div><div></div><div></div><div></div></div></div><div><div><div><div></div><div></div><div></div></div></div><div><div><div><div></div><div></div><div></div></div></div><div><div><div><div></div><div></div><div></div></div></div><div><div><div><div></div><div></div><div></div></div></div><div><div><div><div></div><div></div><div></div></div></div><div><div><div><div></div><div></div><div></div></div></div><div><div><div><div></div><div></div><div></div></div></div><div><div><div><div></div><div></div><div></div></div></div><div><div><div><div></div><div></div><div></div></div></div><div><div><div><div></div><div></div><div></div></div></div><div><div><div><div></div><div></div><div></div></div></div><div><div><div><div></div><div></div><div></div></div></div><div><div><div><div></div><div></div><div></div></div></div><div><div><div><div></div><div></div><div></div></div></div><div><div><div><div></div><div></div><div></div></div></div><div><div><div><div></div><div></div><div></div></div></div><div><div><div><div></div><div></div><div></div></div></div><div><div><div><div></div><div></div><div></div></div></div><div><div><div><div></div><div></div><div></div></div></div><div><div><div><div></div><div></div><div></div></div></div><div><div><div><div></div><div></div><div></div></div></div><div><div><div><div></div><div></div><div></div></div></div><div><div><div><div></div><div></div><div></div></div></div><div><div><div><div></div><div></div><div></div></div></div><div><div><div><div></div><div></div><div></div></div></div><div><div><div><div></div><div></div><div></div></div></div><div><div><div><div></div><div></div><div></div></div></div><div><div><div><div></div><div></div><div></div></div></div><div><div><div><div></div><div></div><div></div></div></div><div><div><div><div></div><div></div><div></div></div></div><div><div><div><div></div><div></div><div></div></div></div><div><div><div><div></div><div></div><div></div></div></div><div><div><div><div></div><div></div><div></div></div></div><div><div><div><div></div><div></div><div></div></div></div><div><div><div><div></div><div></div><div></div></div></div><div><div><div><div></div><div></div><div></div></div></div><div><div><div><div></div><div></div><div></div></div></div><div><div><div><div></div><div></div><div></div></div></div><div><div><div><div></div><div></div><div></div></div></div><div><div><div><div></div><div></div><div></div></div></div><div><div><div><div></div><div></div><div></div></div></div><div><div><div><div></div><div></div><div></div></div></div><div><div><div><div></div><div></div><div></div></div></div><div><div><div><div></div><div></div><div></div></div></div><div><div><div><div></div><div></div><div></div></div></div><div><div><div><div></div><div></div><div></div></div></div><div><div><div><div></div><div></div><div></div></div></div><div><div><div><div></div><div></div><div></div></div></div><div><div><div><div></div><div></div><div></div></div></div><div><div><div><div></div><div></div><div></div></div></div><div><div><div><div></div><div></div><div></div></div></div><div><div><div><div></div><div></div><div></div></div></div><div><div><div><div></div><div></div><div></div></div></div><div><div><div><div></div><div></div><div></div></div></div><div><div><div><div></div><div></div><div></div></div></div><div><div><div><div></div><div></div><div></div></div></div><div><div><div><div></div><div></div><div></div></div></div><div><div><div><div></div><div></div><div></div></div></div><div><div><div><div></div><div></div><div></div></div></div><div><div><div><div></div><div></div><div></div></div></div><div><div><div><div></div><div></div><div></div></div></div><div><div><div><div></div><div></div><div></div></div></div><div><div><div><div></div><div></div><div></div></div></div><div><div><div><div></div><div></div><div></div></div></div><div><div><div><div></div><div></div><div></div></div></div><div><div><div><div></div><div></div><div></div></div></div><div><div><div><div></div><div></div><div></div></div></div><div><div><div><div></div><div></div><div></div></div></div><div><div><div><div></div><div></div><div></div></div></div><div><div><div><div></div><div></div><div></div></div></div><div><div><div><div></div><div></div><div></div></div></div><div><div><div><div></div><div></div><div></div></div></div><div><div><div><div></div><div></div><div></div></div></div><div><div><div><div></div><div></div><div></div></div></div><div><div><div><div></div><div></div><div></div></div></div><div><div><div><div></div><div></div><div></div></div></div><div><div><div><div></div><div></div><div></div></div></div><div><div><div><div></div><div></div><div></div></div></div><div><div><div><div></div><div></div><div></div></div></div><div><div><div><div></div><div></div><div></div></div></div><div><div><div><div></div><div></div><div></div></div></div><div><div><div><div></div><div></div><div></div></div></div><div><div><div><div></div><div></div><div></div></div></div><div><div><div><div></div><div></div><div></div></div></div><div><div><div><div></div><div></div><div></div></div></div><div><div><div><div></div><div></div><div></div></div></div><div><div><div><div></div><div></div><div></div></div></div><div><div><div><div></div><div></div><div></div></div></div><div><div><div><div></div><div></div><div></div></div></div><div><div><div><div></div><div></div><div></div></div></div><div><div><div><div></div><div></div><div></div></div></div><div><div><div><div></div><div></div><div></div></div></div><div><div><div><div></div><div></div><div></div></div></div><div><div><div><div></div><div></div><div></div></div></div><div><div><div><div></div><div></div><div></div></div></div><div><div><div><div></div><div></div><div></div></div></div><div><div><div><div></div><div></div><div></div></div></div><div><div><div><div></div><div></div><div></div></div></div><div><div><div><div></div><div></div><div></div></div></div><div><div><div><div></div><div></div><div></div></div></div><div><div><div><div></div><div></div><div></div></div></div><div><div><div><div></div><div></div><div></div></div></div><div><div><div><div></div><div></div><div></div></div></div><div><div><div><div></div><div></div><div></div></div></div><div><div><div><div></div><div></div><div></div></div></div><div><div><div><div></div><div></div><div></div></div></div><div><div><div><div></div><div></div><div></div></div></div><div><div><div><div></div><div></div><div></div></div></div><div><div><div><div></div><div></div><div></div></div></div><div><div><div><div></div><div></div><div></div></div></div><div><div><div><div></div><div></div><div></div></div></div><div><div><div><div></div><div></div><div></div></div></div><div><div><div><div></div><div></div><div></div></div></div><div><div><div><div></div><div></div><div></div></div></div><div><div><div><div></div><div></div><div></div></div></div><div><div><div><div></div><div></div><div></div></div></div><div><div><div><div></div><div></div><div></div></div></div><div><div><div><div></div><div></div><div></div></div></div><div><div><div><div></div><div></div><div></div></div></div><div><div><div><div></div><div></div><div></div></div></div><div><div><div><div></div><div></div><div></div></div></div><div><div><div><div></div><div></div><div></div></div></div><div><div><div><div></div><div></div><div></div></div></div><div><div><div><div></div><div></div><div></div></div></div><div><div><div><div></div><div></div><div></div></div></div><div><div><div><div></div><div></div><div></div></div></div><div><div><div><div></div><div></div><div></div></div></div><div><div><div><div></div><div></div><div></div></div></div><div><div><div><div></div><div></div><div></div></div></div><div><div><div><div></div><div></div><div></div></div></div><div><div><div>&lt;</div></div></div></div></div></div></div></div></div></div></div></div></div></div></div></div></div></div></div></div></div></div></div></div></div></div></div></div></div></div></div></div></div></div></div></div></div></div></div></div></div></div></div></div></div></div></div></div></div></div></div></div></div></div></div></div></div></div></div></div></div></div></div></div></div></div></div></div></div></div></div></div></div></div></div></div></div></div></div></div></div></div></div></div></div></div></div></div></div></div></div></div></div></div></div></div></div></div></div></div></div></div></div></div></div></div></div></div></div></div></div></div></div></div></div></div></div></div></div></div></div></div></div></div></div></div></div></div></div></div></div></div></div></div></div></div></div></div></div></div></div></div></div></div></div></div></div></div></div></div></div></div></div></div></div></div></div></div></div></div></div></div></div></div></div></div></div></div></div></div></div></div></div></div></div></div></div></div></div></div></div></div></div></div></div></div></div></div></div></div></div></div></div></div></div></div></div></div></div></div></div></div></div></div></div></div></div></div></div></div></div></div></div></div></div></div></div></div></div></div></div></div></div></div></div></div></div></div></div></div></div></div></div></div></div></div></div></div></div></div></div></div></div></div></div></div></div></div></div></div></div></div></div></div></div></div></div> |
|---------------------------------------------------------------------------------------------------------------------------------------------------------------------------------------------------------------------------------------------------------------------------------------------------------------------------------------------------------------------------------------------------------------------------------------------------------------------------------------------------------------------------------------------------------------------------------------------------------------------------------------------------------------------------------------------------------------------------------------------------------------------------------------------------------------------------------------------------------------------------------------------------------------------------------------------------------------------------------------------------------------------------------------------------------------------------------------------------------------------------------------------------------------------------------------------------------------------------------------------------------------------------------------------------------------------------------------------------------------------------------------------------------------------------------------------------------------------------------------------------------------------------------------------------------------------------------------------------------------------------------------------------------------------------------------------------------------------------------------------------------------------------------------------------------------------------------------------------------------------------------------------------------------------------------------------------------------------------------------------------------------------------------------------------------------------------------------------------------------------------------------------------------------------------------------------------------------------------------------------------------------------------------------------------------------------------------------------------------------------------------------------------------------------------------------------------------------------------------------------------------------------------------------------------------------------------------------------------------------------------------------------------------------------------------------------------------------------------------------------------------------------------------------------------------------------------------------------------------------------------------------------------------------------------------------------------------------------------------------------------------------------------------------------------------------------------------------------------------------------------------------------------------------------------------------------------------------------------------------------------------------------------------------------------------------------------------------------------------------------------------------------------------------------------------------------------------------------------------------------------------------------------------------------------------------------------------------------------------------------------------------------------------------------------------------------------------------------------------------------------------------------------------------------------------------------------------------------------------------------------------------------------------------------------------------------------------------------------------------------------------------------------------------------------------------------------------------------------------------------------------------------------------------------------------------------------------------------------------------------------------------------------------------------------------------------------------------------------------------------------------------------------------------------------------------------------------------------------------------------------------------------------------------------------------------------------------------------------------------------------------------------------------------------------------------------------------------------------------------------------------------------------------------------------------------------------------------------------------------------------------------------------------------------------------------------------------------------------------------------------------------------------------------------------------------------------------------------------------------------------------------------------------------------------------------------------------------------------------------------------------------------------------------------------------------------------------------------------------------------------------------------------------------------------------------------------------------------------------------------------------------------------------------------------------------------------------------------------------------------------------------------------------------------------------------------------------------------------------------------------------------------------------------------------------------------------------------------------------------------------------------------------------------------------------------------------------------------------------------------------------------------------------------------------------------------------------------------------------------------------------------------------------------------------------------------------------------------------------------------------------------------------------------------------------------------------------------------------------------------------------------------------------------------------------------------------------------------------------------------------------------------------------------------------------------------------------------------------------------------------------------------------------------------------------------------------------------------------------------------------------------------------------------------------------------------------------------------------------------------------------------------------------------------------------------------------------------------------------------------------------------------------------------------------------------------------------------------------------------------------------------------------------------------------------------------------------------------------------------------------------------------------------------------------------------------------------------------------------------------------------------------------------------------------------------------------------------------------------------------------------------------------------------------------------------------------------------------------------------------------------------------------------------------------------------------------------------------------------------------------------------------------------------------------------------------------------------------------------------------------------------------------------------------------------------------------------------------------------------------------------------------------------------------------------------------------------------------------------------------------------------------------------------------------------------------------------------------------------------------------------------------------------------------------------------------------------------------------------------------------------------------------------------------------------------------------------------------------------------------------------------------------------------------------------------------------------------------------------------------------------------------------------------------------------------------------------------------------------------------------------------------------------------------------------------------------------------------------------------------------------------------------------------------------------------------------------------------------------------------------------------------------------------------------------------------------------------------------------------------------------------------------------------------------------------------------------------------------------------------------------------------------------------------------------------------------------------------------------------------------------------------------------------------------------------------------------------------------------------------------------------------------------------------------------------------------------------------------------------------------------------------------------------------------------------------------------------------------------------------------------------------------------------------------------------------------------------------------------------------------------------------------------------------------------------------------------------------------------------------------------------------------------------------------------------------------------------------------------------------------------------------------------------------------------------------------------------------------------------------------------------------------------------------------------------------------------------------------------------------------------------------------------------------------------------------------------------------------------------------------------------------------------------------------------------------------------------------------------------------------------------------------------------------------------------------------------------------------------------------------------------------------------------------------------------------------------------------------------------------------------------------------------------------------------------------------------------------------------------------------------------------------------------------------------------------------------------------------------------------------------------------------------------------------------------------------------------------------------------------------------------------------------------------------------------------------------------------------------------------------------------------------------------------------------------------------------------------------------------------------------------------------------------------------------------------------------------------------------------------------------------------------------------------------------------------------------------------------------------------------------------------------------------------------------------------------------------------------------------------------------------------------------------------------------------------------------------------------------------------------------------------------------------------------------------------------------------------------------------------------------------------------------------------------------------------------------------------------------------------------------------------------------------------------------------------------------------------------------------------------------------------------------------------------------------------------------------------------------------------------------------------------------------------------------------------------------------------------------------------------------------------------------------------------------------------------------------------------------------------------------------------------------------------------------------------------------------------------------------------------------------------------------------------------------------------------------------------------------------------------------------------------------------------------------------------------------------------------------------------------------------------------------------------------------------------------------------------------------------------------------------------------------------------------------------------------------------------------------------------------------------------------------------------------------------------------------------------------------------------------------------------------------------------------------------------------------------------------------------------------------------------------------------------------------------------------------------------------------------------------------------------------------------------------------------------------------------------------------------------------------------------------------------------------------------------------------------------------------------------------------------------------------------------------------------------------------------------------------------------------------------------------------------------------------------------------------------------------------------------------------------------------------------------------------------------------------------------------------------------------------------------------------------------------------------------------------------------------------------------------------------------------------------------------------------------------------------------------------------------------------------------------------------------------------------------------------------------------------------------------------------------------------------------------------------------------------------------------------------------------------------------------------------------------------------------------------------------------------------------------------------------------------------------------------------------------------------------------------------------------------------------------------------------------------------------------------------------------------------------------------------------------------------------------------------------------------------------------------------------------------------------------------------------------------------------------------------------------------------------------------------------------------------------------------------------------------------------------------------------------------------------------------------------------------------------------------------------------------------------------------------------------------------------------------------------------------------------------------------------------------------------------------------------------------------------------------------------------------------------------------------------------------------------------------------------------------------------------------------------------------------------------------------------------------------------------------------------------------------------------------------------------------------------------------------------------------------------------------------------------------------------------------------------------------------------------------------------------------------------------------------------------------------------------------------------------------------------------------------------------------------------------------------------------------------------------------------------------------------------------------------------------------------------------------------------------------------------------------------------------------------------------------------------------------------------------------------------------------------------------------------------------------------------------------------------------------------------------------------------------------------------------------------------------------|

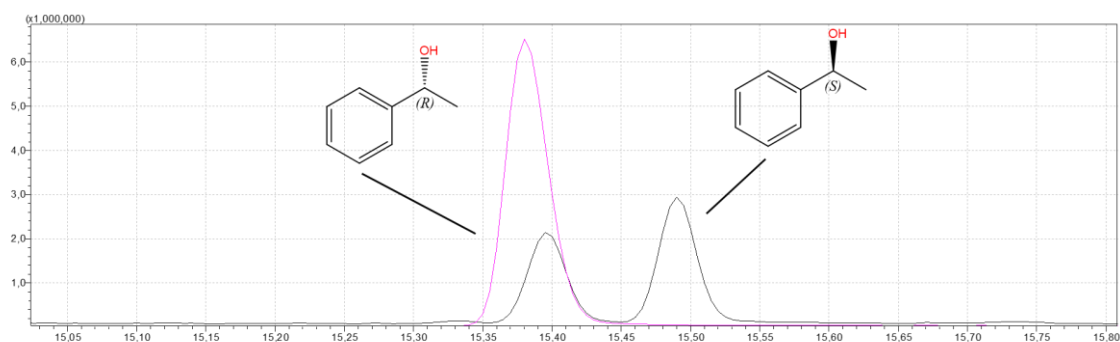

**Figure S3: Determination of the enantiomeric excess of 1a.** Black: after reaction, pink: authentic standard (*R*)-1-phenylethanol **1a**. Reactions were conducted in 50 mM sodium phosphate buffer pH 7.0 with 2 mM MgCl<sub>2</sub>, 1 mM substrate, 4 mM hydrogen peroxide, 1.3  $\mu$ M *AbrUPO*, 8 mM ascorbic acid at 25 °C and 600 rpm for 180 min.

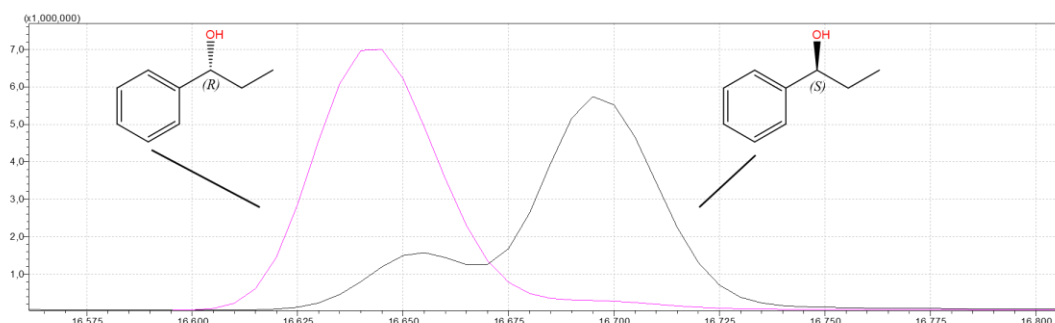

**Figure S4: Determination of the enantiomeric excess of 2a.** Black: after reaction, pink: authentic standard (*R*)-1-phenyl-1-propanol **2a**. Reactions were conducted in 50 mM sodium phosphate buffer pH 7.0 with 2 mM MgCl<sub>2</sub>, 1 mM substrate, 4 mM hydrogen peroxide, 1.3  $\mu$ M *AbrUPO*, 8 mM ascorbic acid at 25 °C and 600 rpm for 180 min.

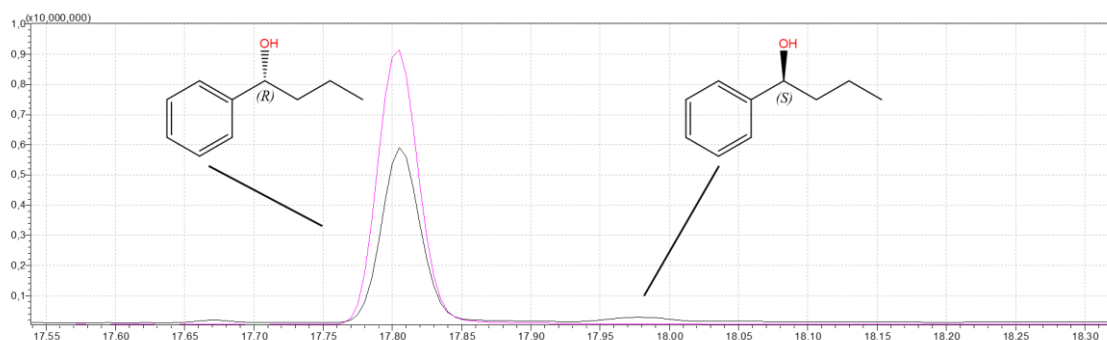

**Figure S5: Determination of the enantiomeric excess of 3a.** Black: after reaction, pink: authentic standard (*R*)-1-phenyl-1-butanol **3a**. Reactions were conducted in 50 mM sodium phosphate buffer pH 7.0 with 2 mM  $\text{MgCl}_2$ , 1 mM substrate, 4 mM hydrogen peroxide, 1.3  $\mu\text{M}$  *Abr*UPO, 8 mM ascorbic acid at 25 °C and 600 rpm for 180 min.

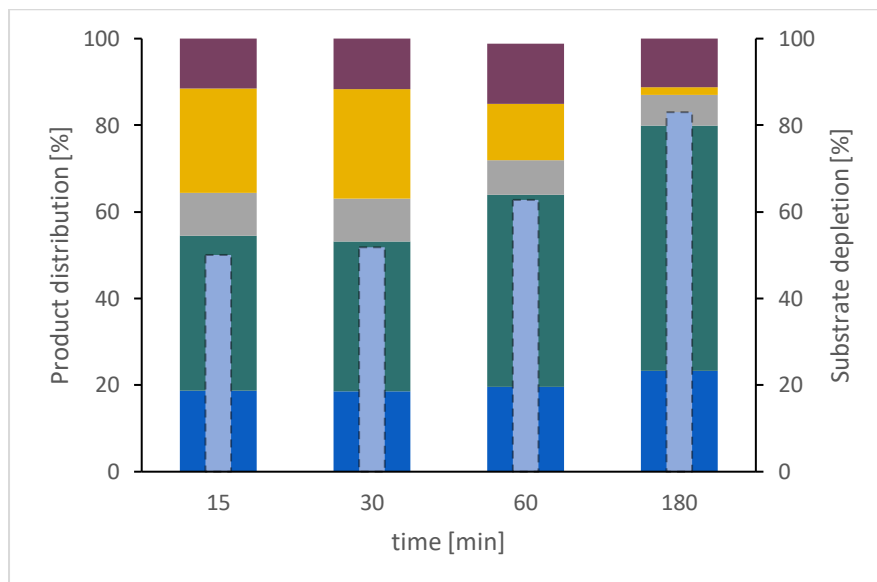

**Figure S6: Time course *p*-cymene 5 conversion.** Blue: *p*-cymene-8-ol **5a**; teal: thymohydroquinone **5b**; grey: thymoquinone **5c**; yellow; aromatic mono-hydroxylated **5d**; purple: other unidentified products; light blue: substrate depletion. Reactions were conducted in 50 mM sodium phosphate buffer pH 7.0 with 2 mM  $\text{MgCl}_2$ , 1 mM substrate, 4 mM hydrogen peroxide, 1.3  $\mu\text{M}$  *Abr*UPO, 8 mM ascorbic acid at 25 °C and 600 rpm. Samples were taken after 15, 30, 60 and 180 minutes.

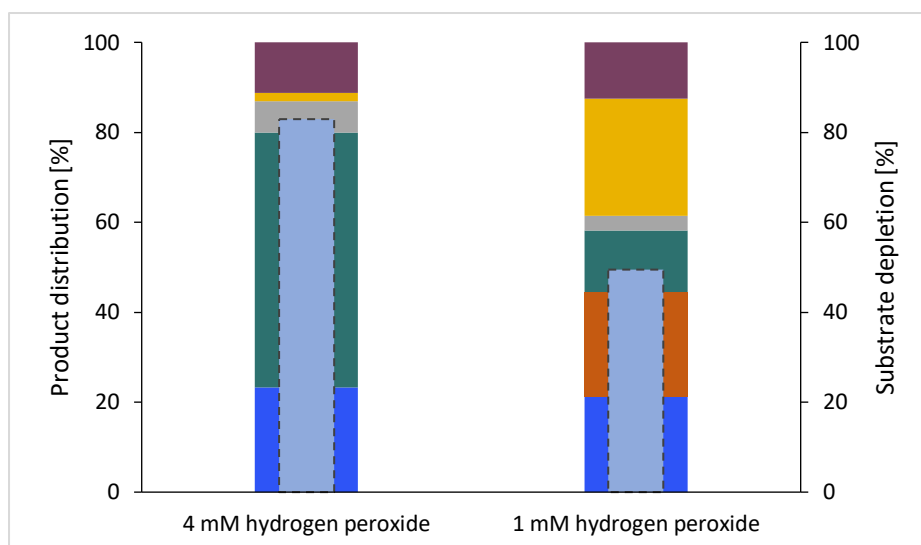

**Figure S7: Influence of peroxide concentration on *p*-cymene 5 conversion.** Blue: *p*-cymene-8-ol **5a**; teal: thymohydroquinone **5b**; grey: thymoquinone **5c**; yellow; aromatic mono-hydroxylated **5d**; purple: other unidentified products; orange: *p*-isopropyl benzaldehyde; light blue: substrate depletion. Reactions were conducted in 50 mM sodium phosphate buffer pH 7.0 with 2 mM MgCl<sub>2</sub>, 1 mM substrate, either 1 mM or 4 mM hydrogen peroxide, 1.3 μM *Abr*UPO, 8 mM ascorbic acid at 25 °C and 600 rpm for 180 min.

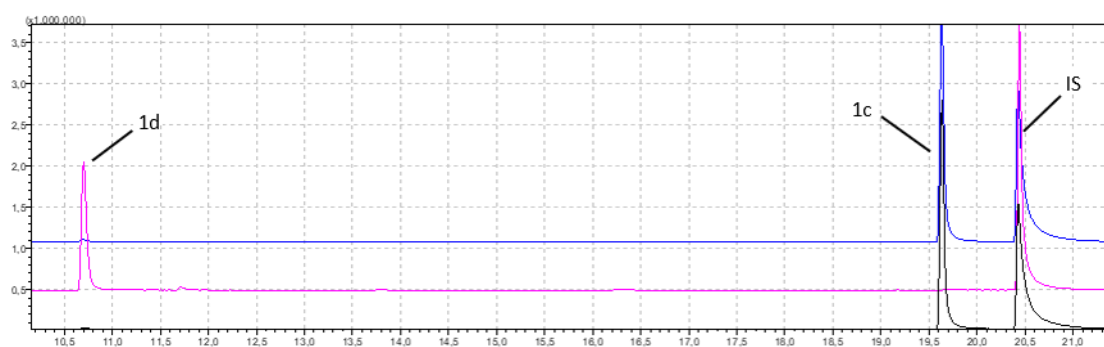

**Figure S8: GC/MS chromatogram of conversions of 2-ethylbenzene-1,4-diol **1c**.** Black: with 8 mM ascorbic acid, pink: without ascorbic acid, blue: without enzyme, with 8 mM ascorbic acid. 10.7 min: 2-ethyl-1,4-benzoquinone **1d**, 19.6 min: 2-ethylbenzene-1,4-diol **1c**, 20.5 min: IS. Reactions were conducted in 50 mM sodium phosphate buffer pH 7.0 with 2 mM MgCl<sub>2</sub>, 1 mM substrate, 4 mM hydrogen peroxide, 1.3 μM *Abr*UPO, at 25 °C and 600 rpm for 180 min.

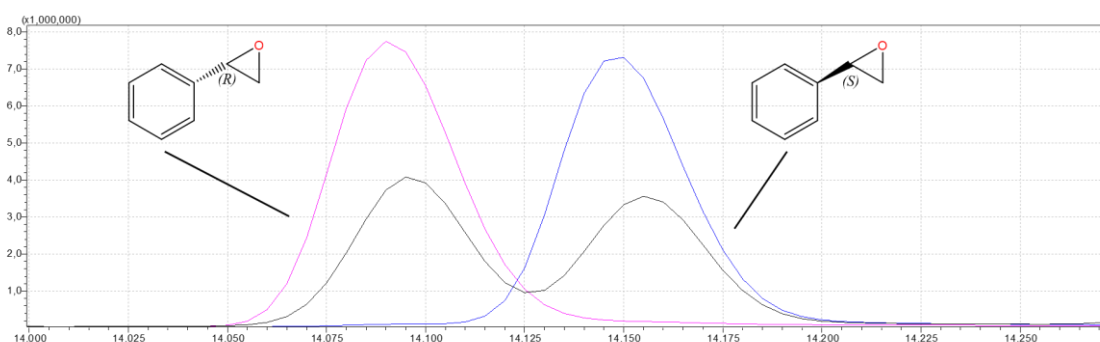

**Figure S9: Determination of the enantiomeric excess of **11a**.** Black: after reaction, pink: authentic standard (*R*)-styrene oxide **11a**, blue: authentic standard (*S*)-styrene oxide. Reactions were conducted in 50 mM sodium phosphate buffer pH 7.0 with 2 mM MgCl<sub>2</sub>, 1 mM substrate, 4 mM hydrogen peroxide, 1.3 μM *Abr*UPO, 8 mM ascorbic acid at 25 °C and 600 rpm for 180 min

**Table S6: Product distribution of PaDa-I-catalysed reactions.** Reactions were conducted in 50 mM sodium phosphate pH 7.0 with 2 mM MgCl<sub>2</sub>, 1 mM substrate, 4 mM hydrogen peroxide, 1.3 μM PaDa-I, 8 mM ascorbic acid at 25 °C and 600 rpm for 180 min.

| Compound | Substrate depletion [%] | Product distribution [%]                                                                                                           |                                                                                                                   |                                                                                                                      |                                                                                                                    |
|----------|-------------------------|------------------------------------------------------------------------------------------------------------------------------------|-------------------------------------------------------------------------------------------------------------------|----------------------------------------------------------------------------------------------------------------------|--------------------------------------------------------------------------------------------------------------------|
| 1        | 96                      | 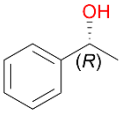<br><b>1a<sup>a</sup></b> , 56, <i>ee</i> = >99 % | 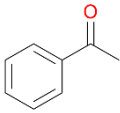<br><b>1b<sup>a</sup></b> , 44   |                                                                                                                      |                                                                                                                    |
| 2        | 72                      | 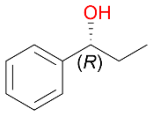<br><b>2a<sup>a</sup></b> , 95, <i>ee</i> = >99 % | 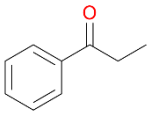<br><b>2b<sup>b</sup></b> , 2    |                                                                                                                      |                                                                                                                    |
| 3        | 42                      | 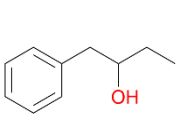<br><b>3f<sup>b</sup></b> , 7                     | 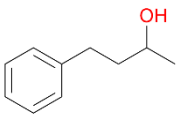<br><b>3g<sup>b</sup></b> , 84   | 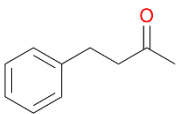<br><b>3h<sup>a</sup></b> , 6      | 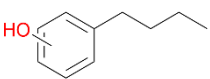<br><b>3i<sup>b</sup></b> , 3** |
| 4        | 84                      | 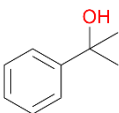<br><b>4a<sup>a</sup></b> , 98                   |                                                                                                                   |                                                                                                                      |                                                                                                                    |
| 5        | 24                      | 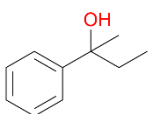<br><b>5a<sup>a</sup></b> , 41                  | 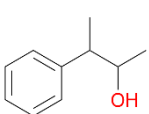<br><b>5b<sup>b</sup></b> , 38 | 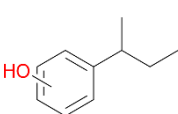<br><b>5f<sup>b</sup></b> , 16** |                                                                                                                    |
| 6        | 30                      | 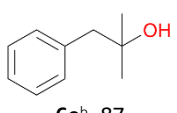<br><b>6e<sup>b</sup></b> , 87                  | 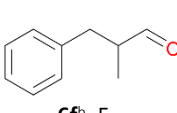<br><b>6f<sup>b</sup></b> , 5  | 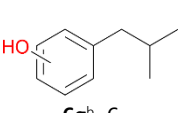<br><b>6g<sup>b</sup></b> , 6    |                                                                                                                    |
| 7        | 81                      | 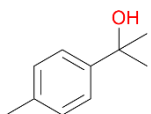<br><b>7a<sup>a</sup></b> , 13                  | 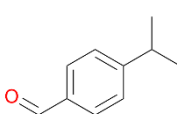<br><b>7e<sup>b</sup></b> , 67 |                                                                                                                      |                                                                                                                    |

<sup>a</sup> verified by MS and reference substance

<sup>b</sup> verified by MS

\*\* Different retention time compared to *AbrUPO*. Hydroxylated either at *meta* or *para* position.

### 3 GCMS chromatograms

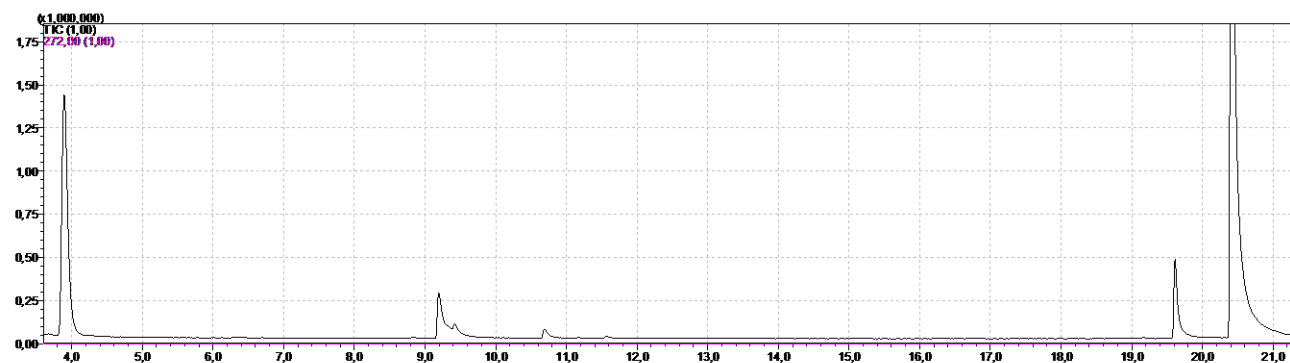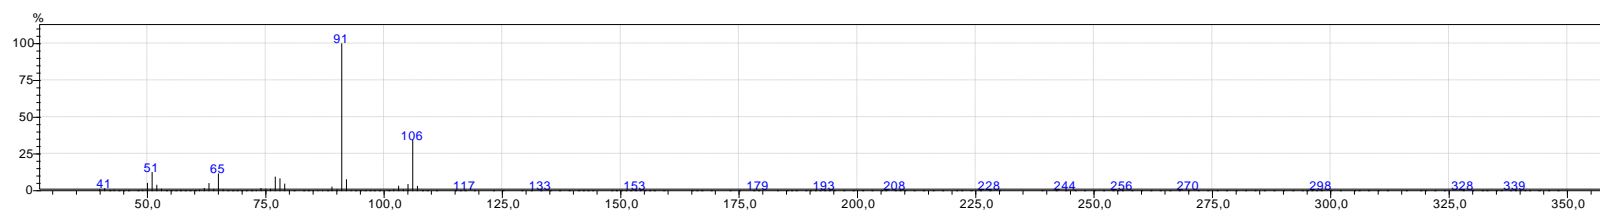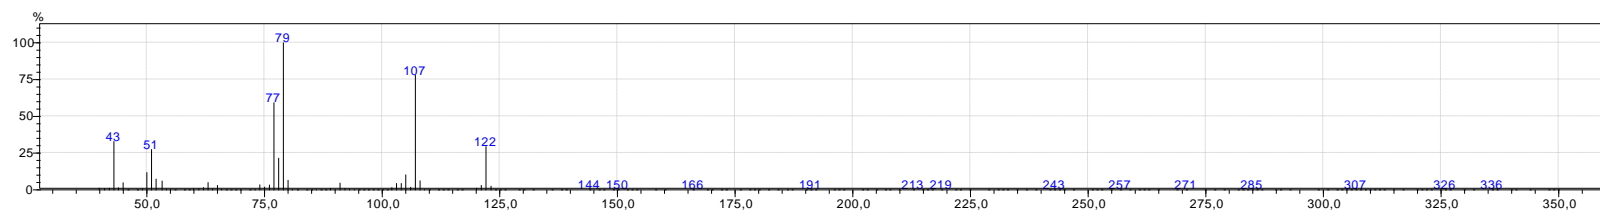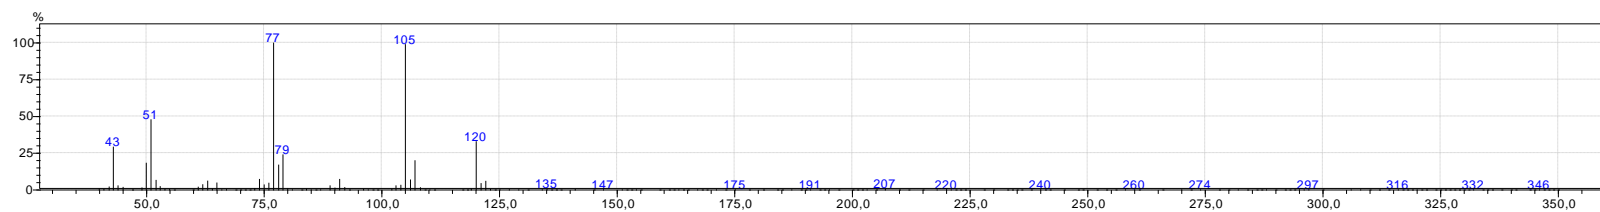

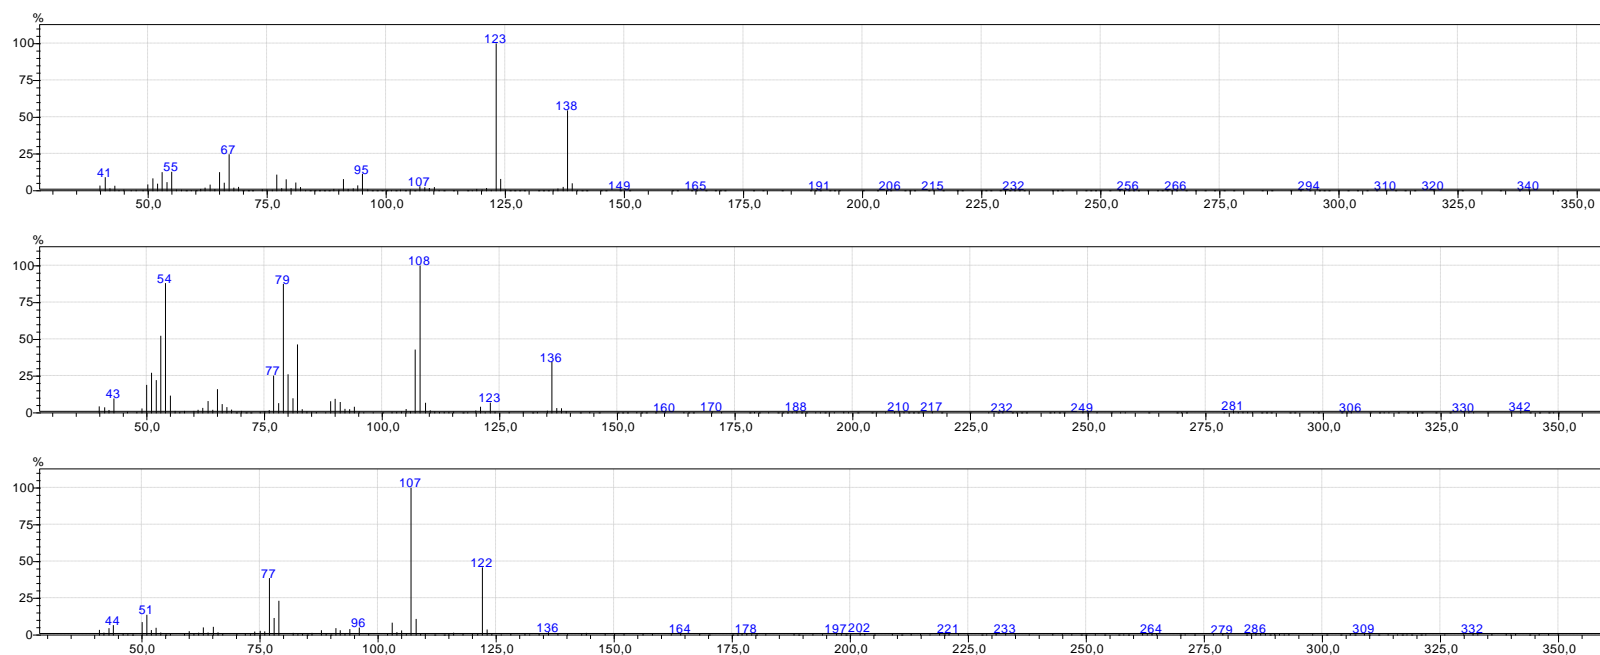

**Figure S10:** GC and MS chromatograms of conversion of **1**. Reactions were conducted in 50 mM sodium phosphate buffer pH 7.0 with 2 mM  $\text{MgCl}_2$ , 1 mM substrate, 4 mM hydrogen peroxide, 1.3  $\mu\text{M}$  *AbrUPO*, 8 mM ascorbate at 25 °C and 600 rpm for 180 min. MS chromatograms of **1** (3.896 min), **1a** (9.195 min), **1b** (9.420 min), **1c** (19.550 min), **1d** (10.691 min) and **1e** (11.532 min) in sorted order.

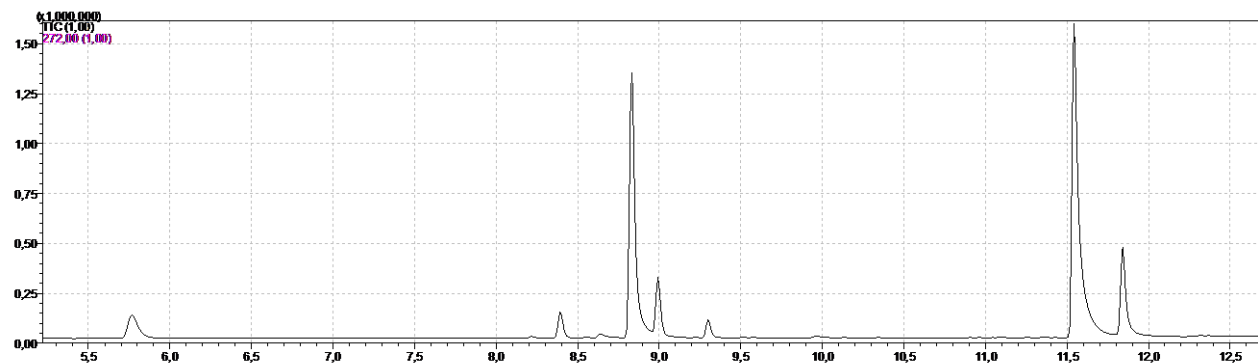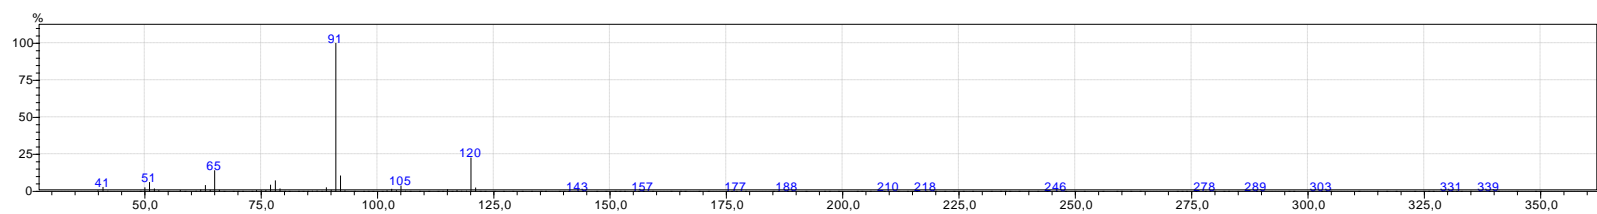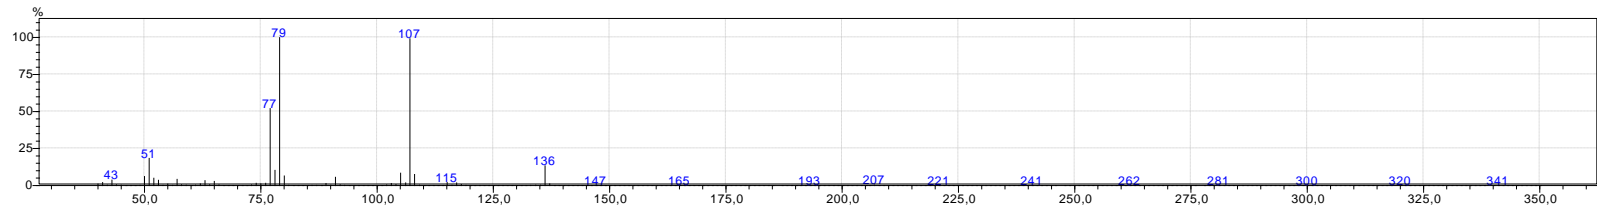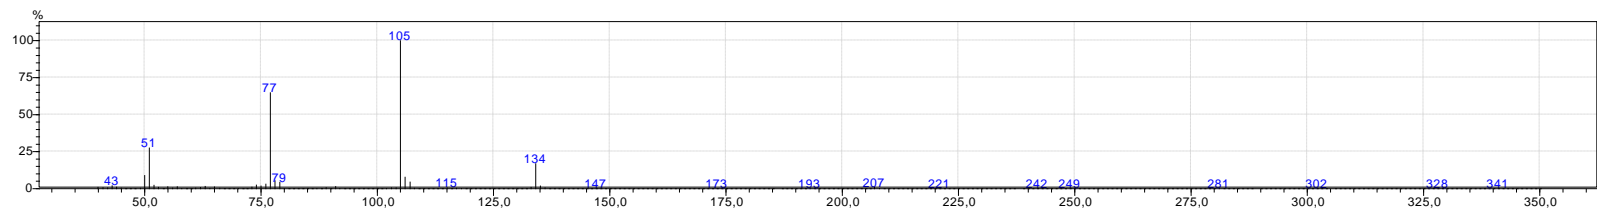

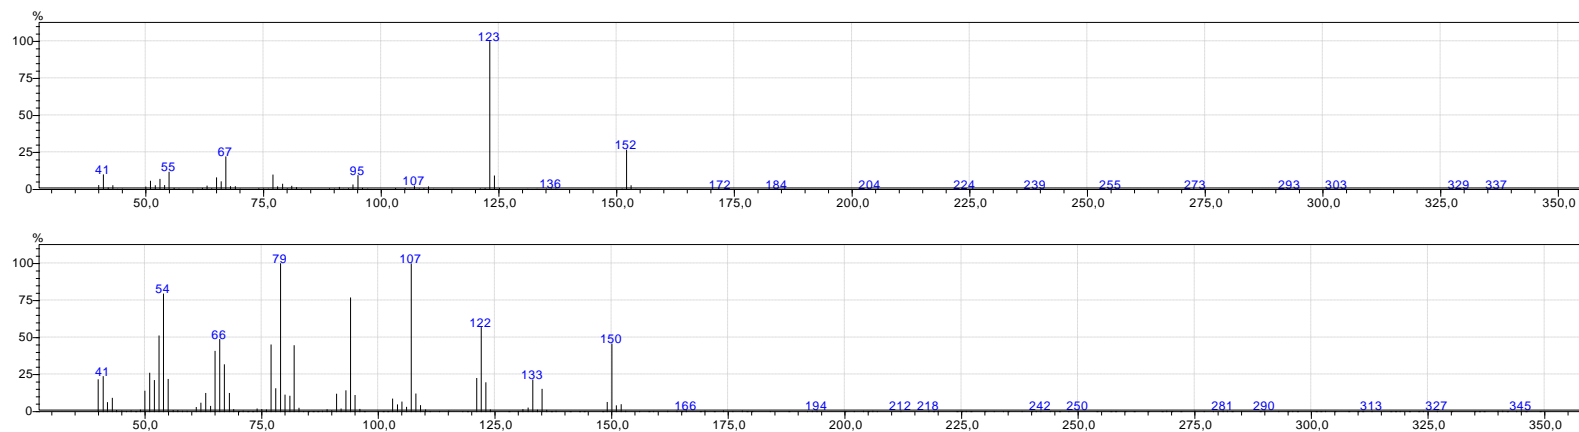

**Figure S11:** GC and MS chromatograms of conversion of **2**. Reactions were conducted in 50 mM sodium phosphate buffer pH 7.0 with 2 mM  $\text{MgCl}_2$ , 1 mM substrate, 4 mM hydrogen peroxide, 1.3  $\mu\text{M}$  *AbrUPO*, 8 mM ascorbate at 25 °C and 600 rpm for 180 min. MS chromatograms of **2** (5.783 min), **2a** (8.831 min), **2b** (8.992 min), **2c** (11.842 min) and **2d** (9.300 min), in sorted order.

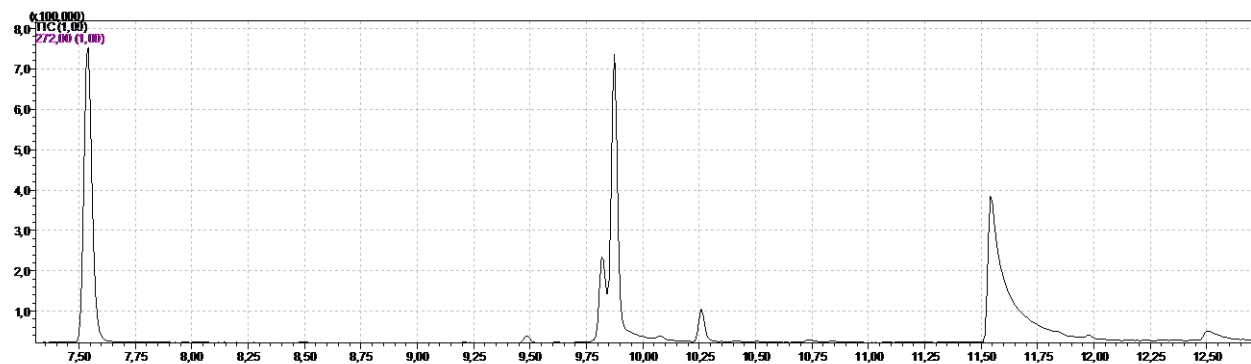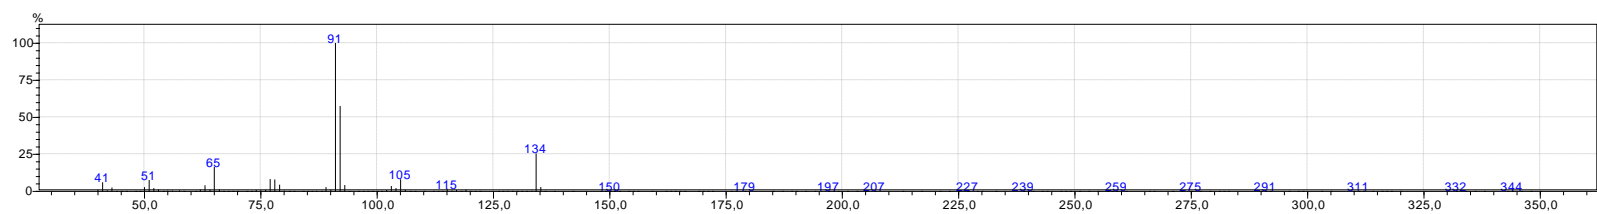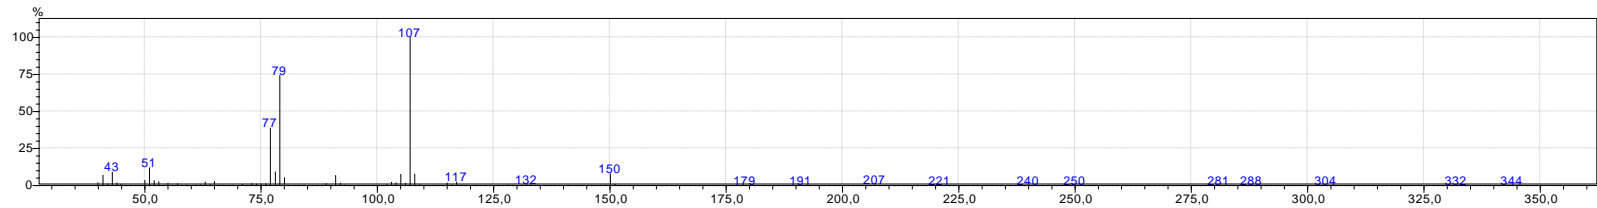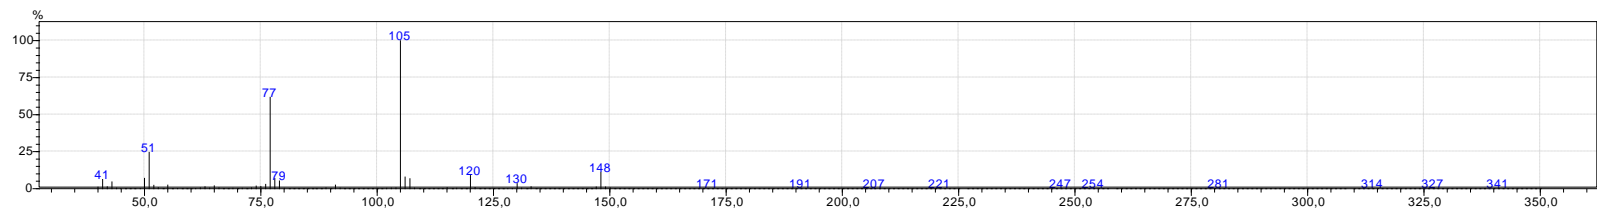

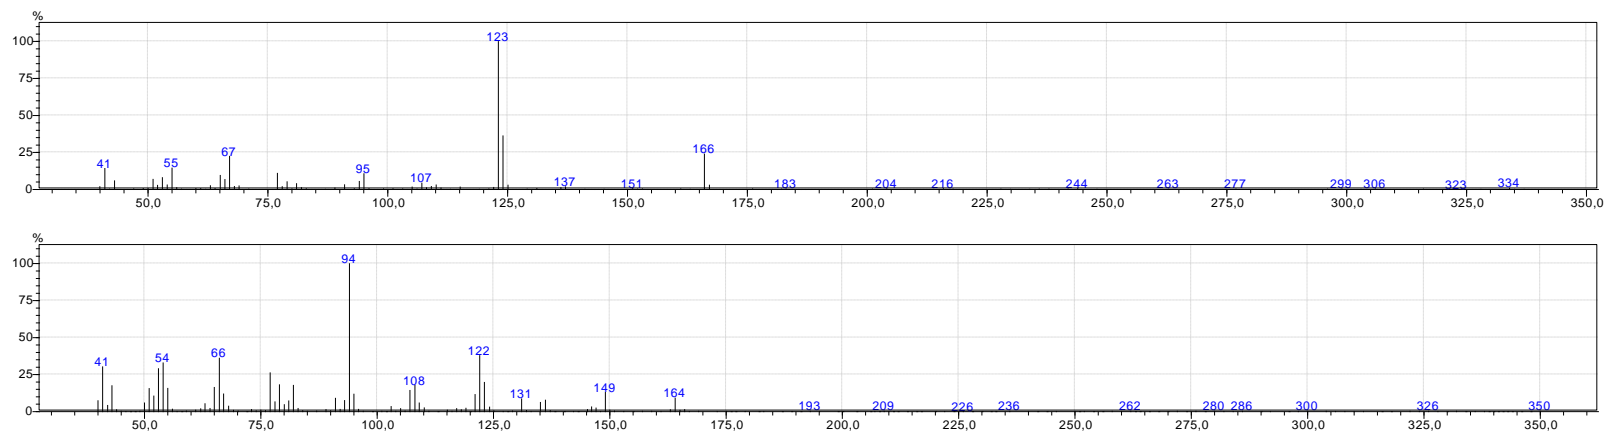

**Figure S12:** GC and MS chromatograms of conversion of **3**. Reactions were conducted in 50 mM sodium phosphate buffer pH 7.0 with 2 mM MgCl<sub>2</sub>, 1 mM substrate, 4 mM hydrogen peroxide, 1.3 μM *AbrUPO*, 8 mM ascorbate at 25 °C and 600 rpm for 180 min. MS chromatograms of **3** (7.549 min), **3a** (9.820 min), **3b** (9.873 min), **3c** (12.506 min) and **3d** (10.260 min) in sorted order.

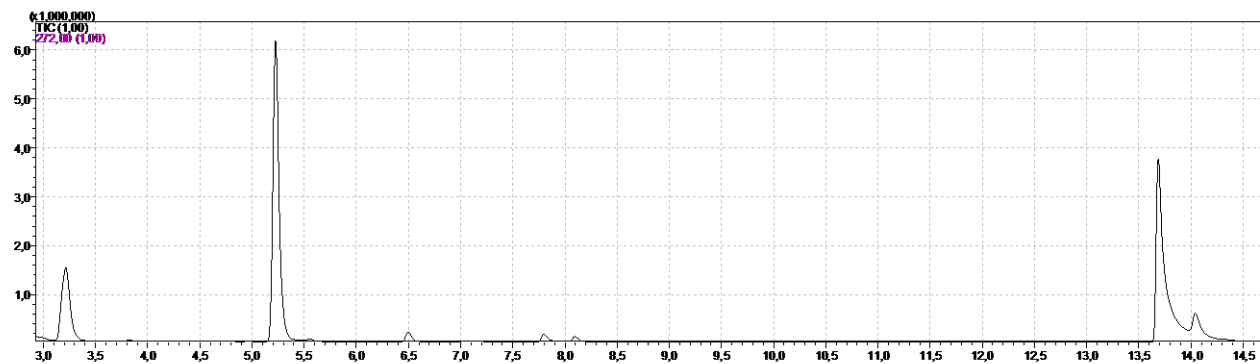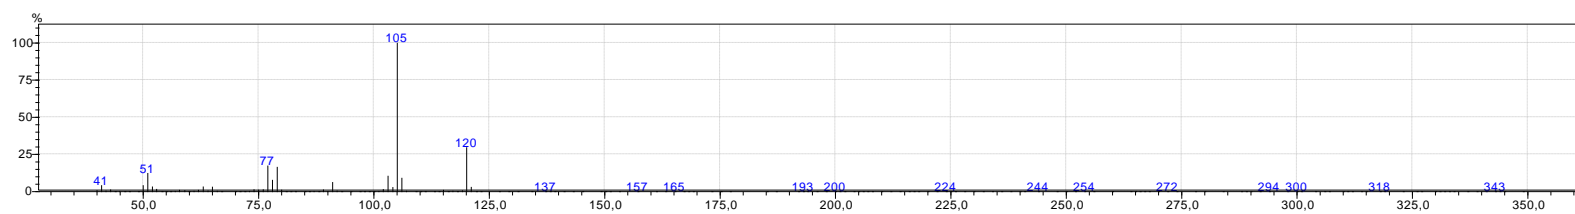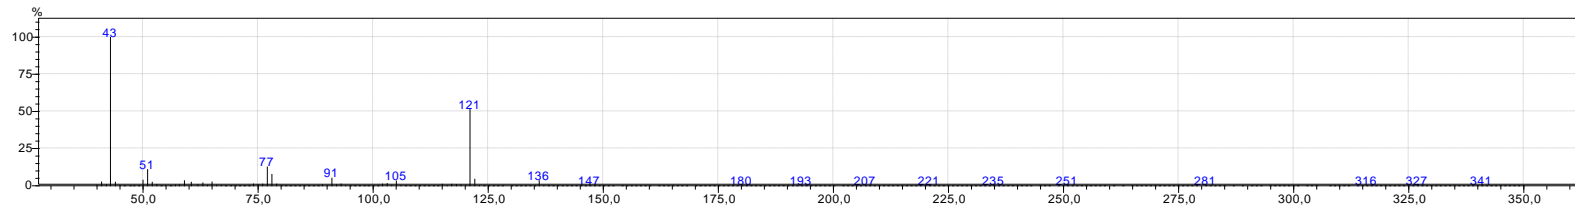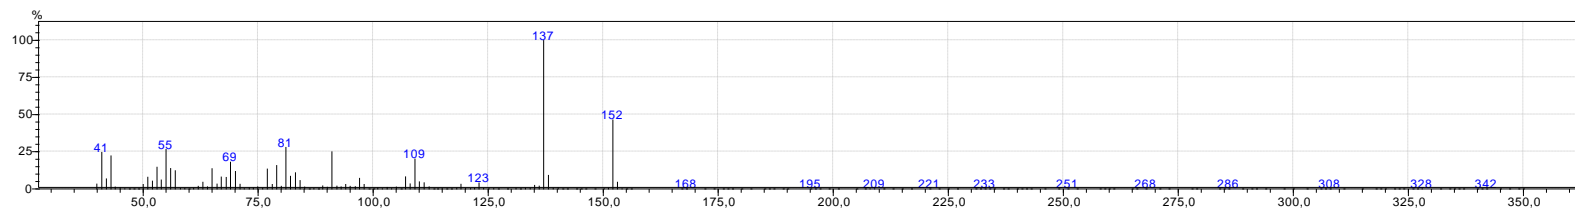

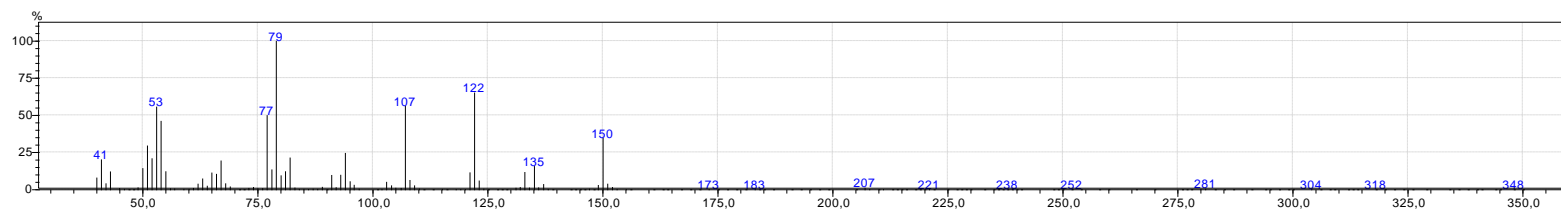

**Figure S13:** GC and MS chromatograms of conversion of **4**. Reactions were conducted in 50 mM sodium phosphate buffer pH 7.0 with 2 mM  $\text{MgCl}_2$ , 1 mM substrate, 4 mM hydrogen peroxide, 1.3  $\mu\text{M}$  *AbrUPO*, 8 mM ascorbate at 25 °C and 600 rpm for 180 min. MS chromatograms of **4** (3.207 min), **4a** (5.244 min), **4b** (13.527 min) and **4c** (6.542min) in sorted order.

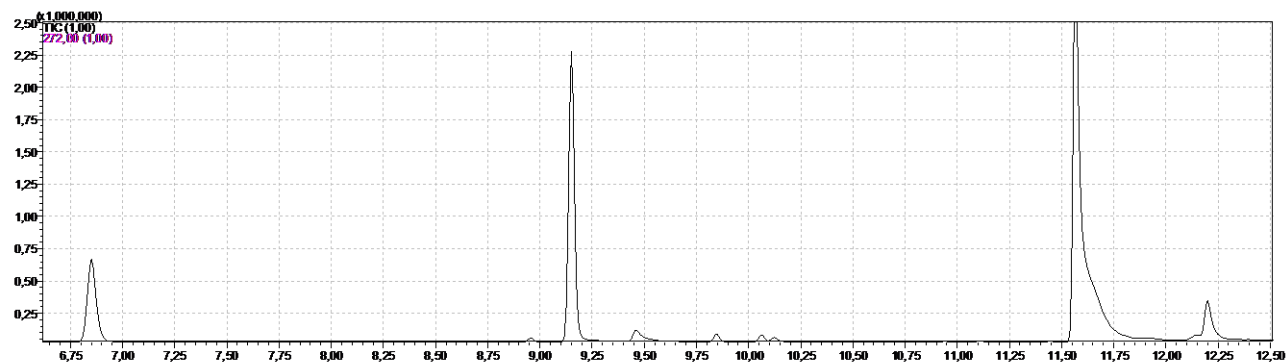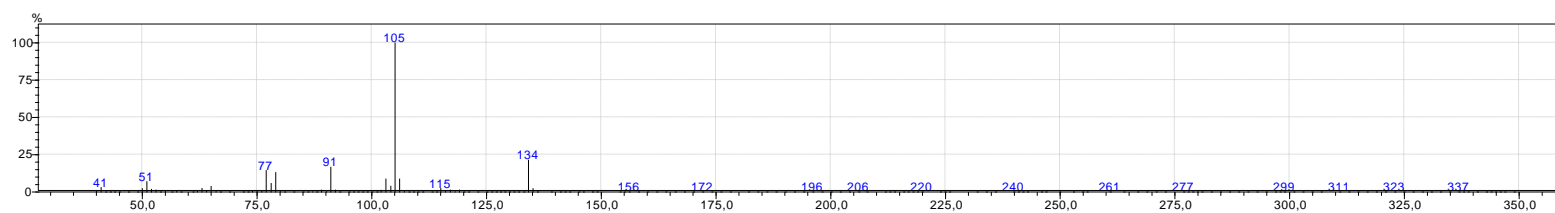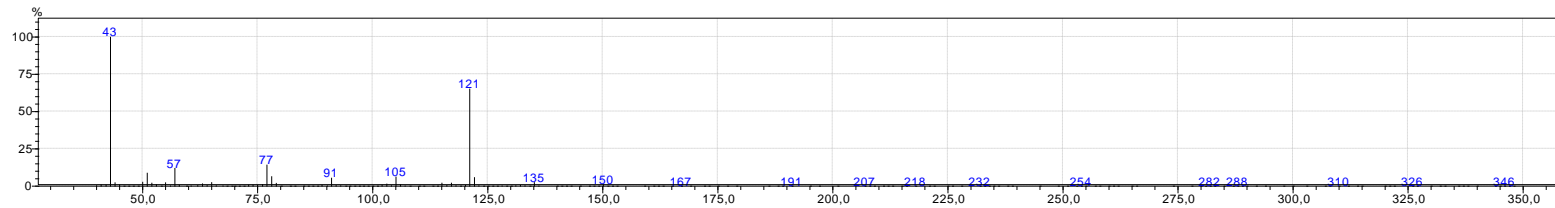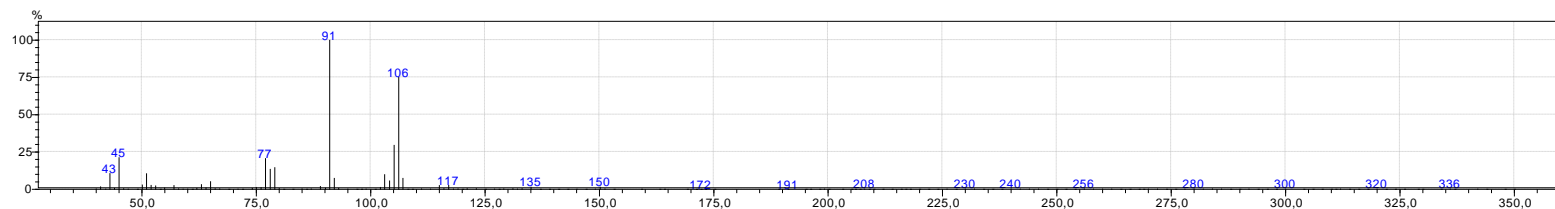

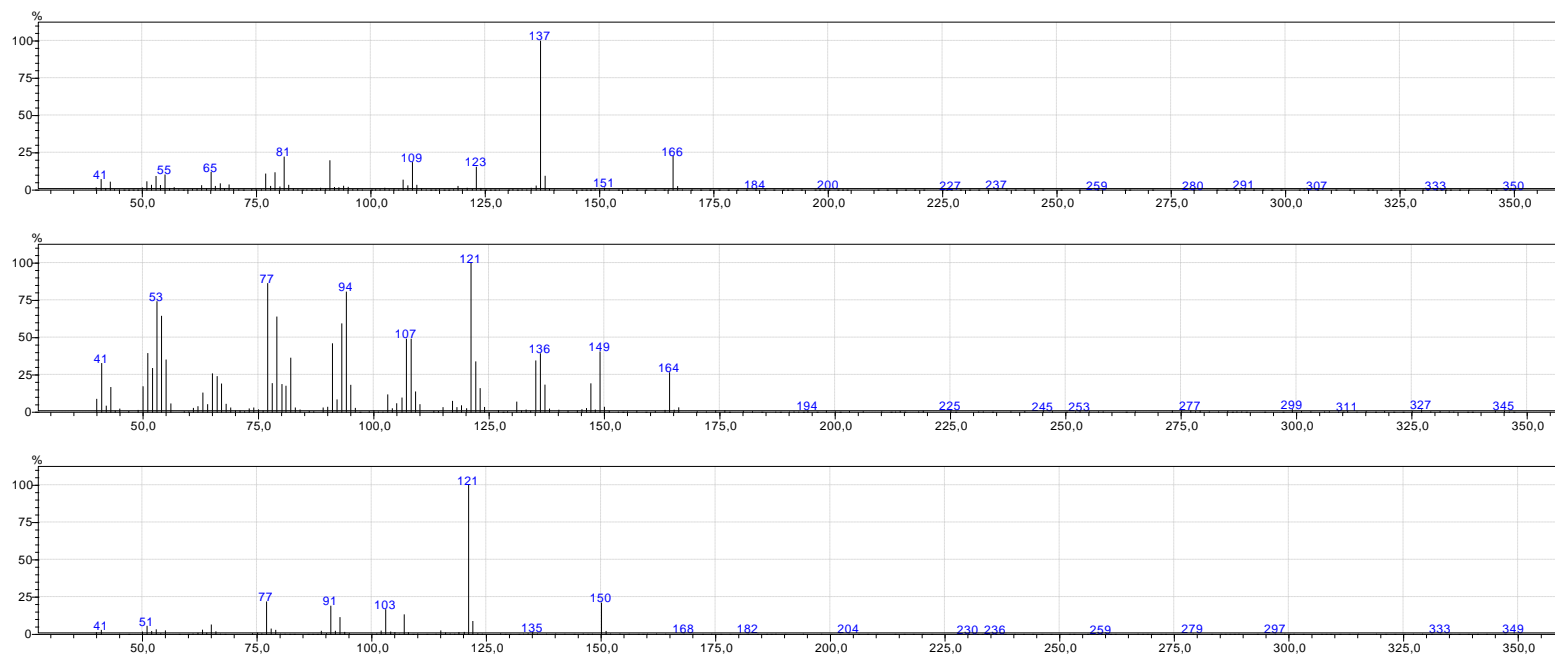

**Figure S14:** GC and MS chromatograms of conversion of **5**. Reactions were conducted in 50 mM sodium phosphate buffer pH 7.0 with 2 mM  $\text{MgCl}_2$ , 1 mM substrate, 4 mM hydrogen peroxide, 1.3  $\mu\text{M}$  *AbrUPO*, 8 mM ascorbate at 25 °C and 600 rpm for 180 min. MS chromatograms of **5** (6.838 min), **5a** (9.151 min), **5b** (9.461 min), **5c** (12.200 min), **5d** (9.846 min) and **5e** (10.062 min) in sorted order.

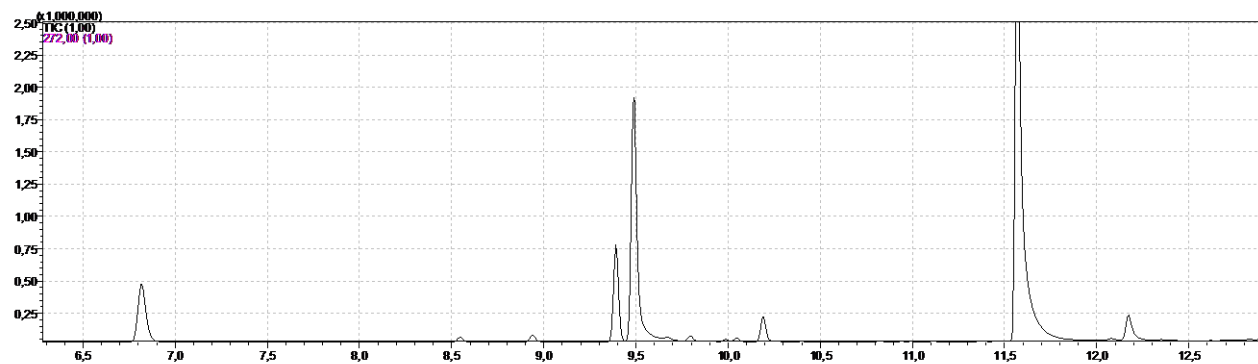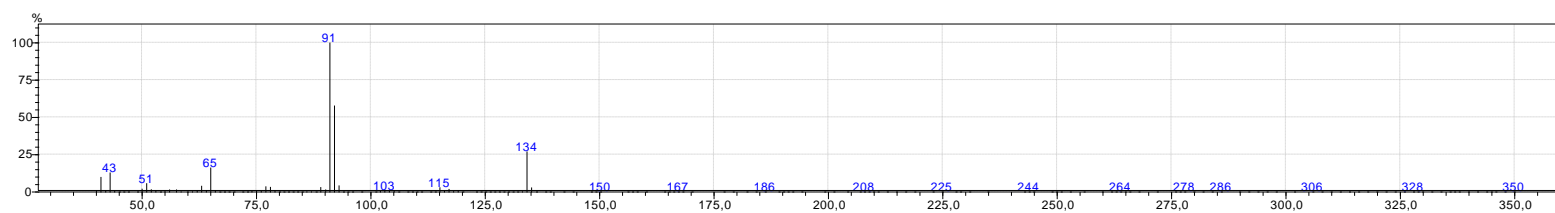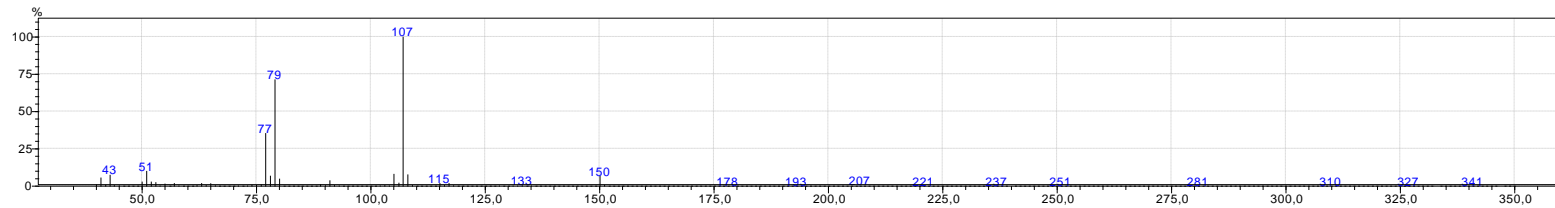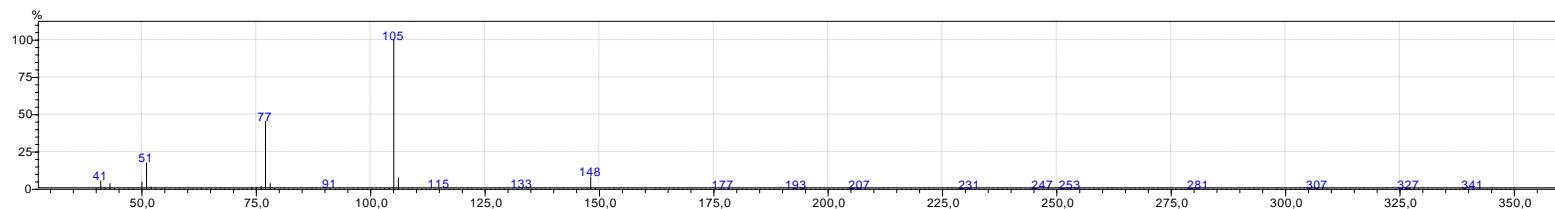

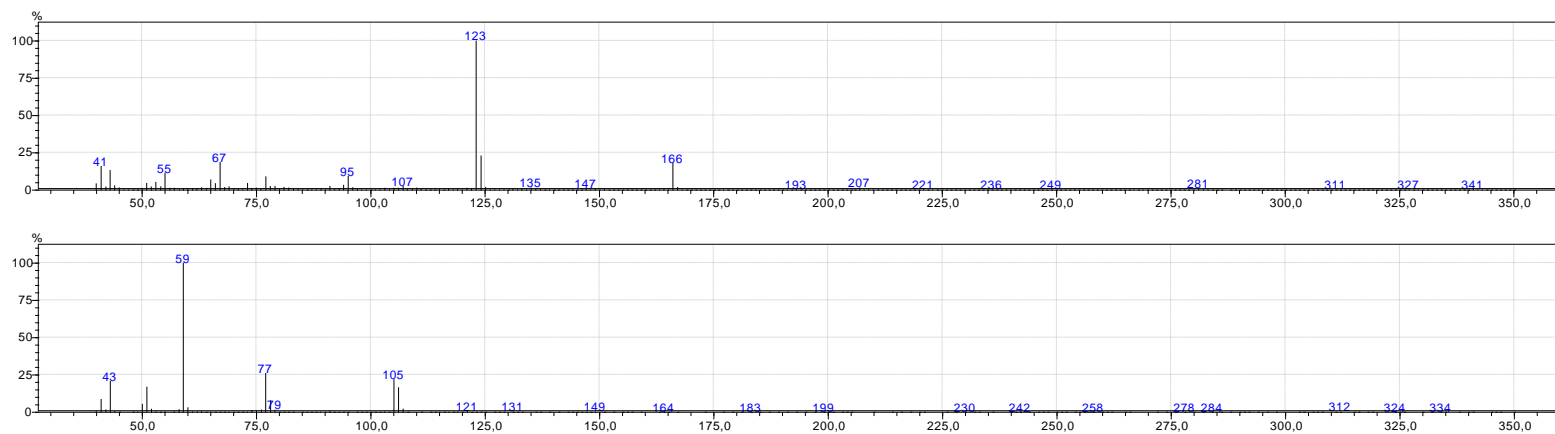

**Figure S15:** GC and MS chromatograms of conversion of **6**. Reactions were conducted in 50 mM sodium phosphate buffer pH 7.0 with 2 mM MgCl<sub>2</sub>, 1 mM substrate, 4 mM hydrogen peroxide, 1.3 μM *AbrUPO*, 8 mM ascorbate at 25 °C and 600 rpm for 180 min. MS chromatograms of **6** (6.828 min), **6a** (9.488 min), **6b** (9.392 min), **6c** (12.133 min) and **6d** (10.190 min) in sorted order.

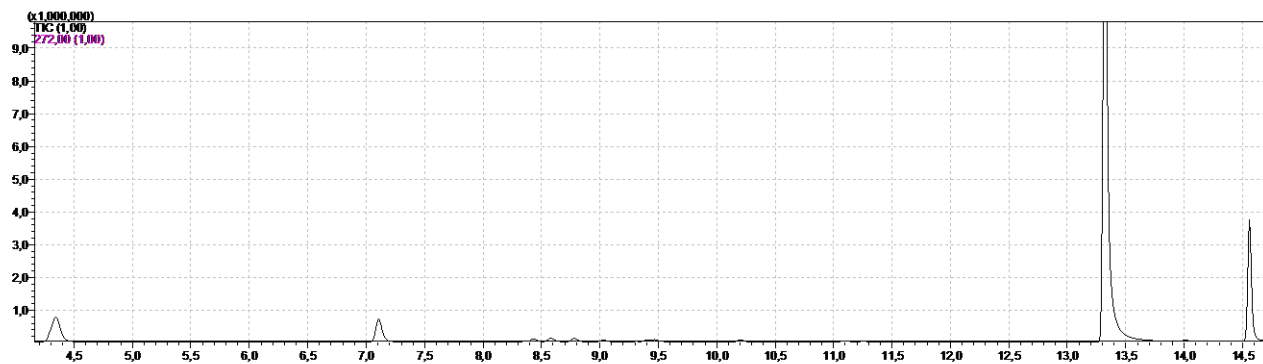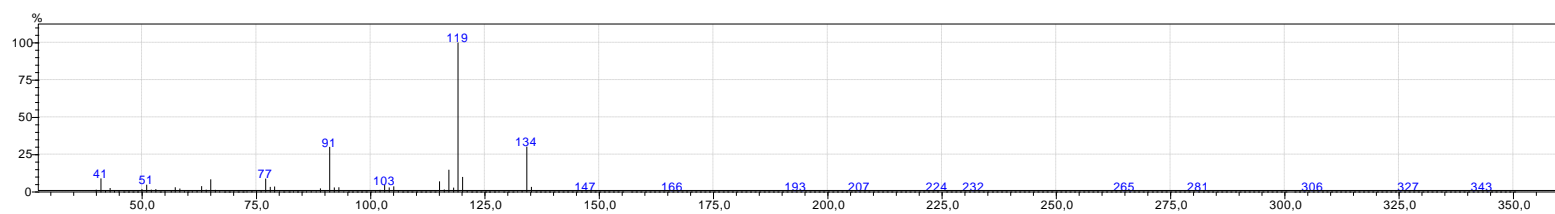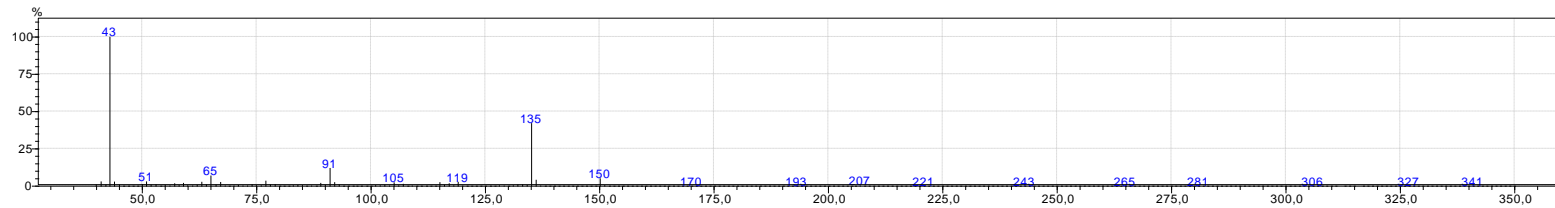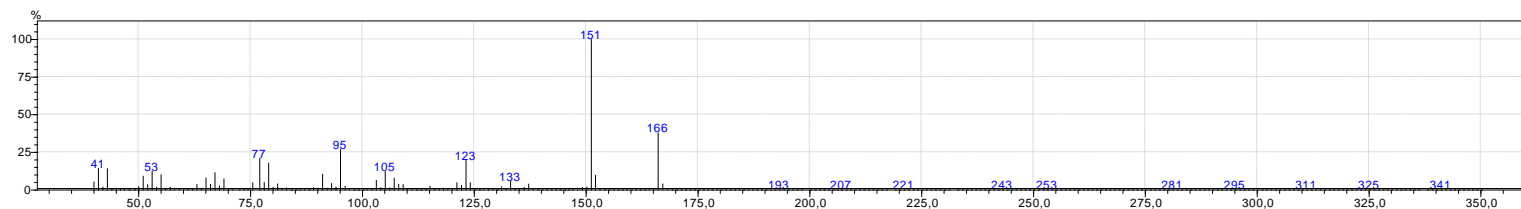

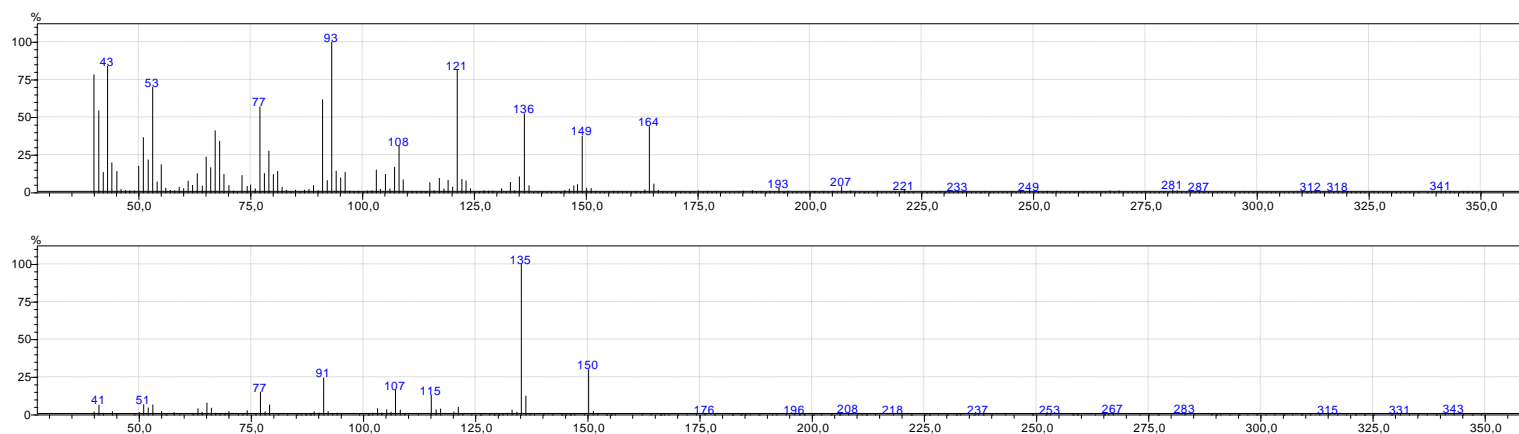

**Figure S16:** GC and MS chromatograms of conversion of **7**. Reactions were conducted in 50 mM sodium phosphate buffer pH 7.0 with 2 mM  $\text{MgCl}_2$ , 1 mM substrate, 4 mM hydrogen peroxide, 1.3  $\mu\text{M}$  *AbrUPO*, 8 mM ascorbate at 25 °C and 600 rpm for 180 min. MS chromatograms of **7** (4.306 min), **7a** (7.079 min), **7b** (14.549 min), **7c** (8.398min) and **7d** (9.440 min) in sorted order.

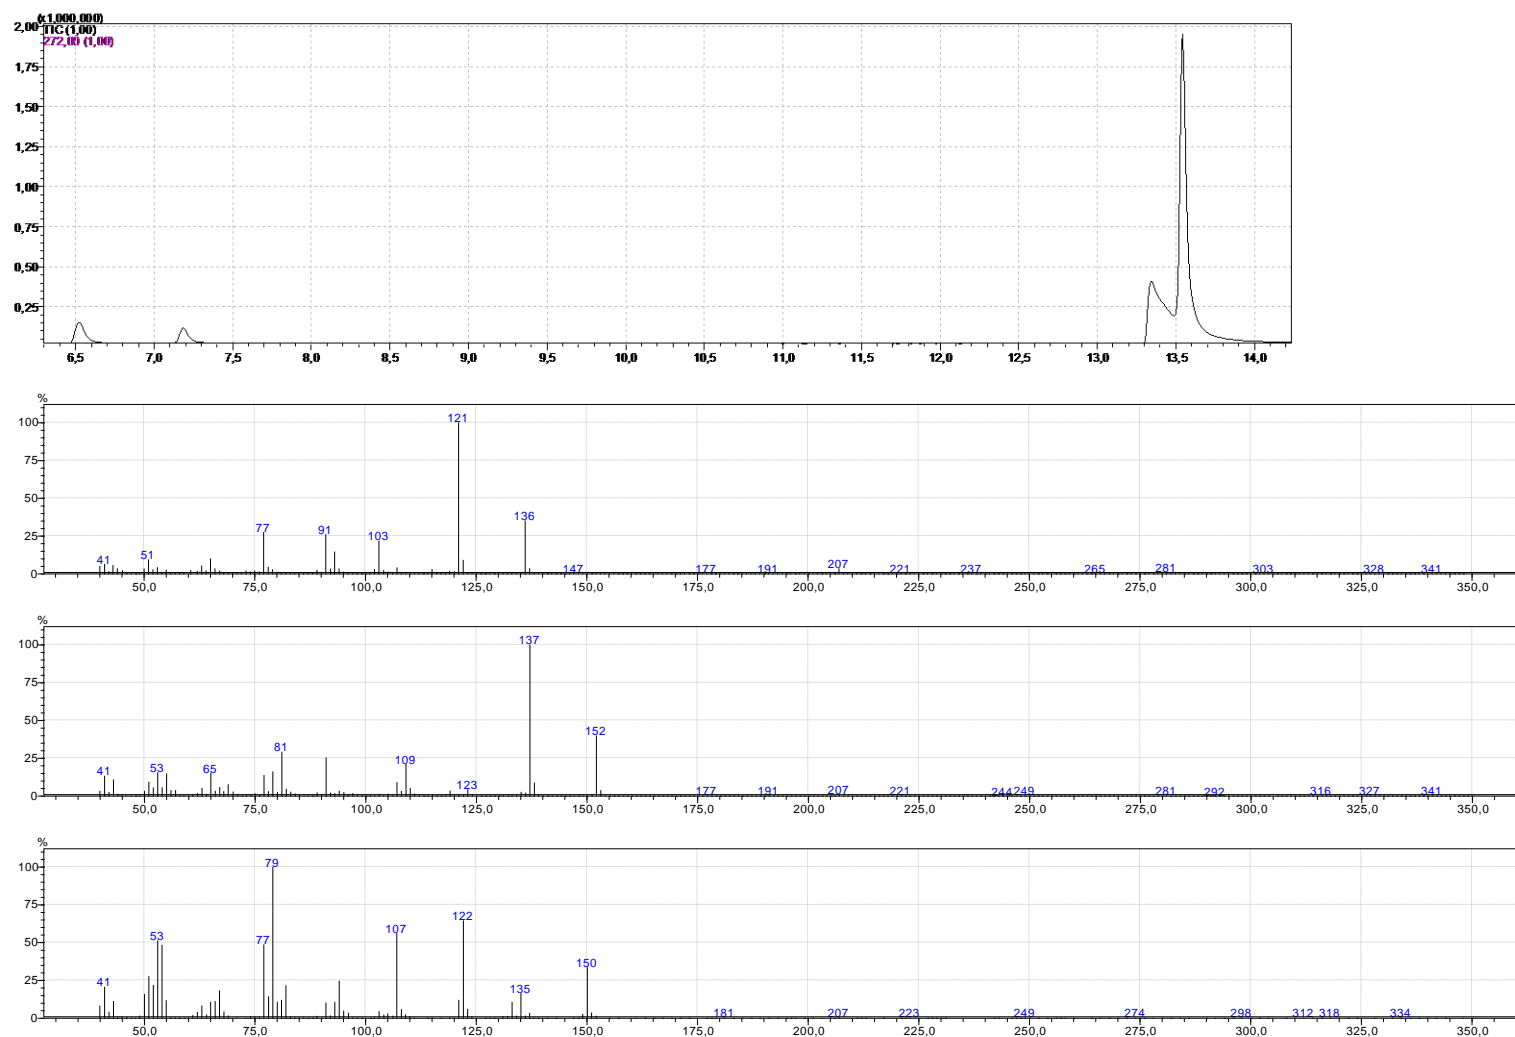

**Figure S17:** GC and MS chromatograms of conversion of **8**. Reactions were conducted in 50 mM sodium phosphate buffer pH 7.0 with 2 mM  $\text{MgCl}_2$ , 1 mM substrate, 4 mM hydrogen peroxide, 1.3  $\mu\text{M}$  *AbrUPO*, 8 mM ascorbate at 25 °C and 600 rpm for 180 min. MS chromatograms of **8** (7.193 min), **8a** (6.522 min) and **8b** (13.543 min) in sorted order.

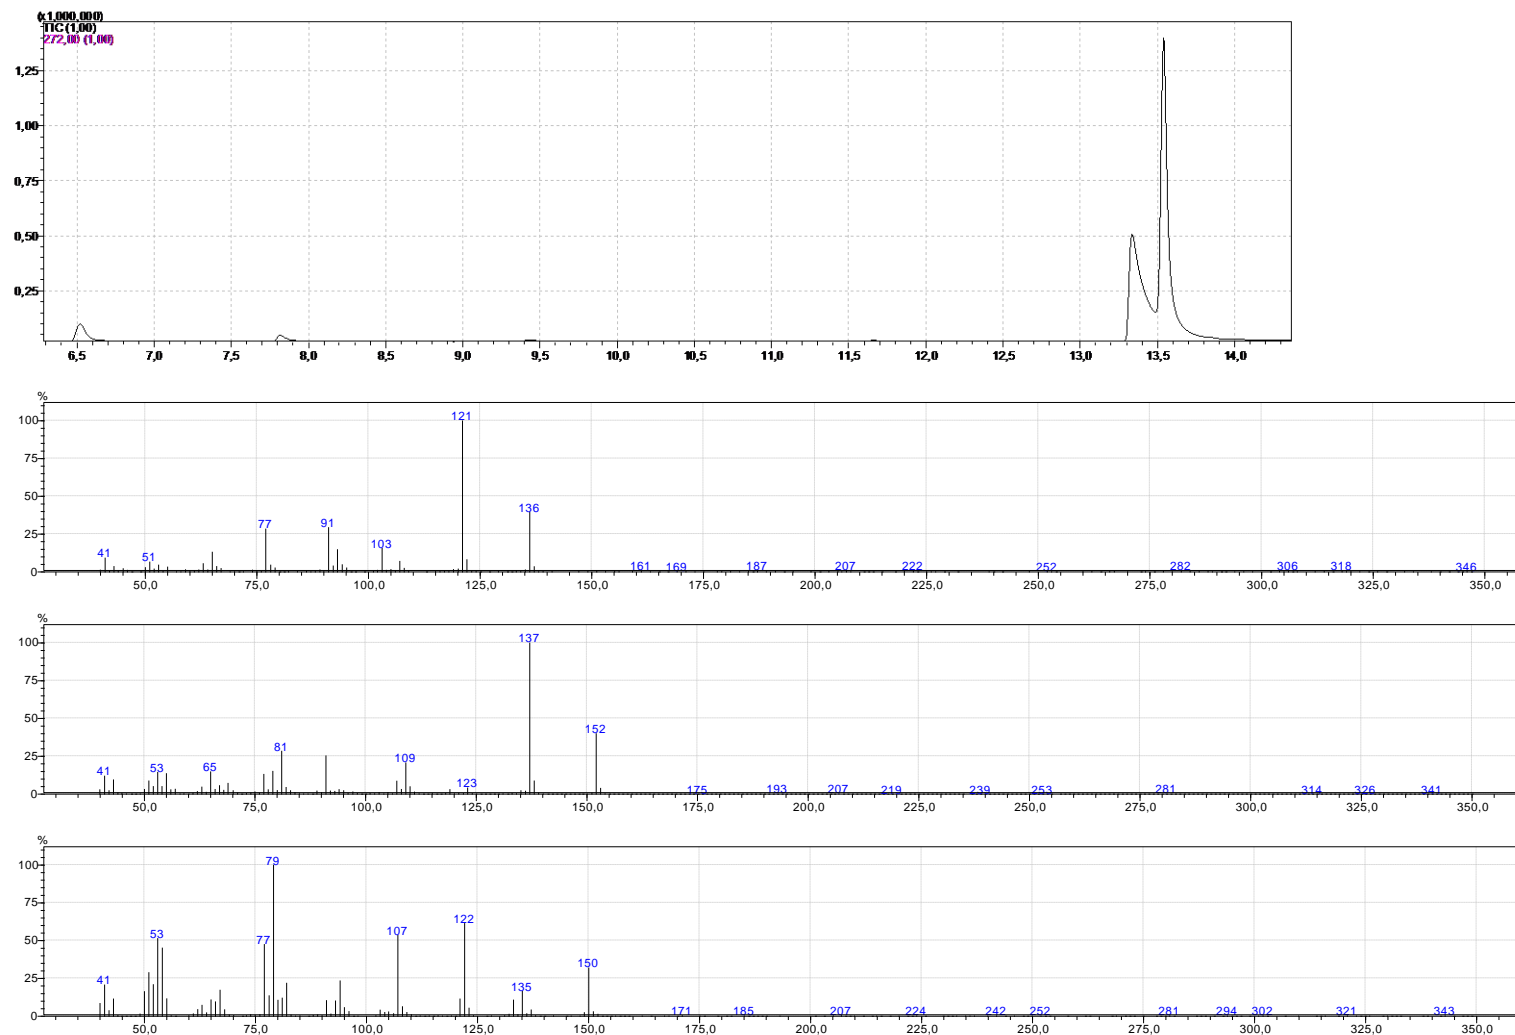

**Figure S18:** GC and MS chromatograms of conversion of **9**. Reactions were conducted in 50 mM sodium phosphate buffer pH 7.0 with 2 mM  $\text{MgCl}_2$ , 1 mM substrate, 4 mM hydrogen peroxide, 1.3  $\mu\text{M}$  *AbrUPO*, 8 mM ascorbate at 25 °C and 600 rpm for 180 min. MS chromatograms of **9** (7.833 min), **9a** (6.521 min) and **9b** (13.540 min) in sorted order.

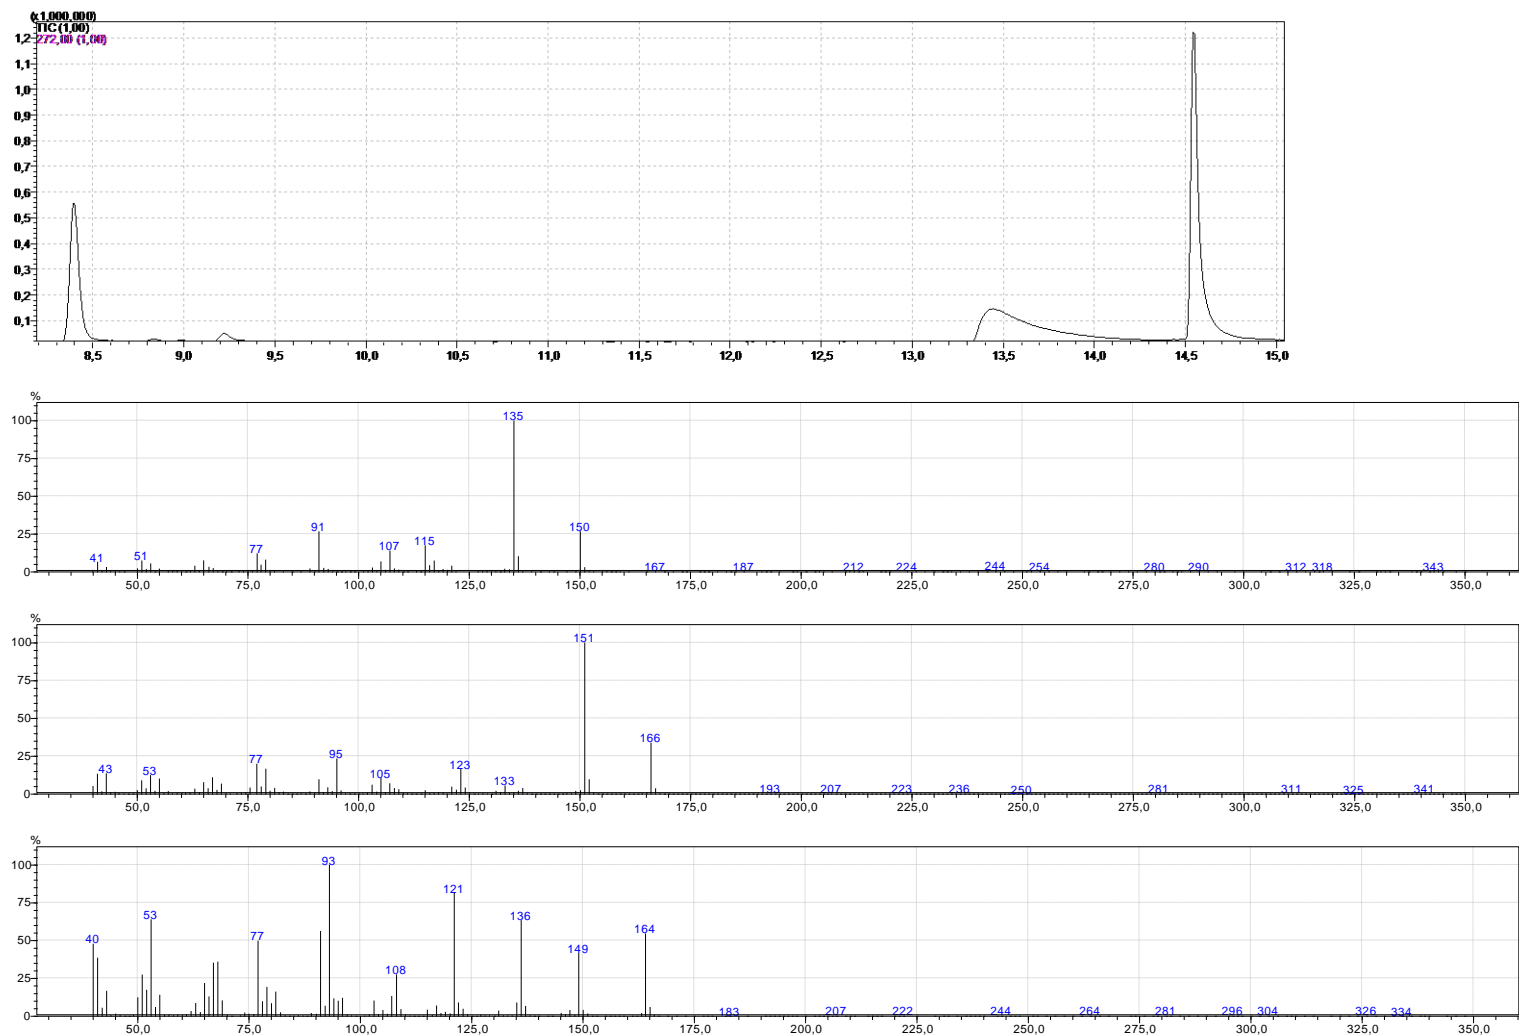

**Figure S19:** GC and MS chromatograms of conversion of **10**. Reactions were conducted in 50 mM sodium phosphate buffer pH 7.0 with 2 mM  $\text{MgCl}_2$ , 1 mM substrate, 4 mM hydrogen peroxide, 1.3  $\mu\text{M}$  *AbrUPO*, 8 mM ascorbate at 25 °C and 600 rpm for 180 min. MS chromatograms of **10** (9.247 min), **10a** (8.397 min) and **10b** (14.545 min) in sorted order.

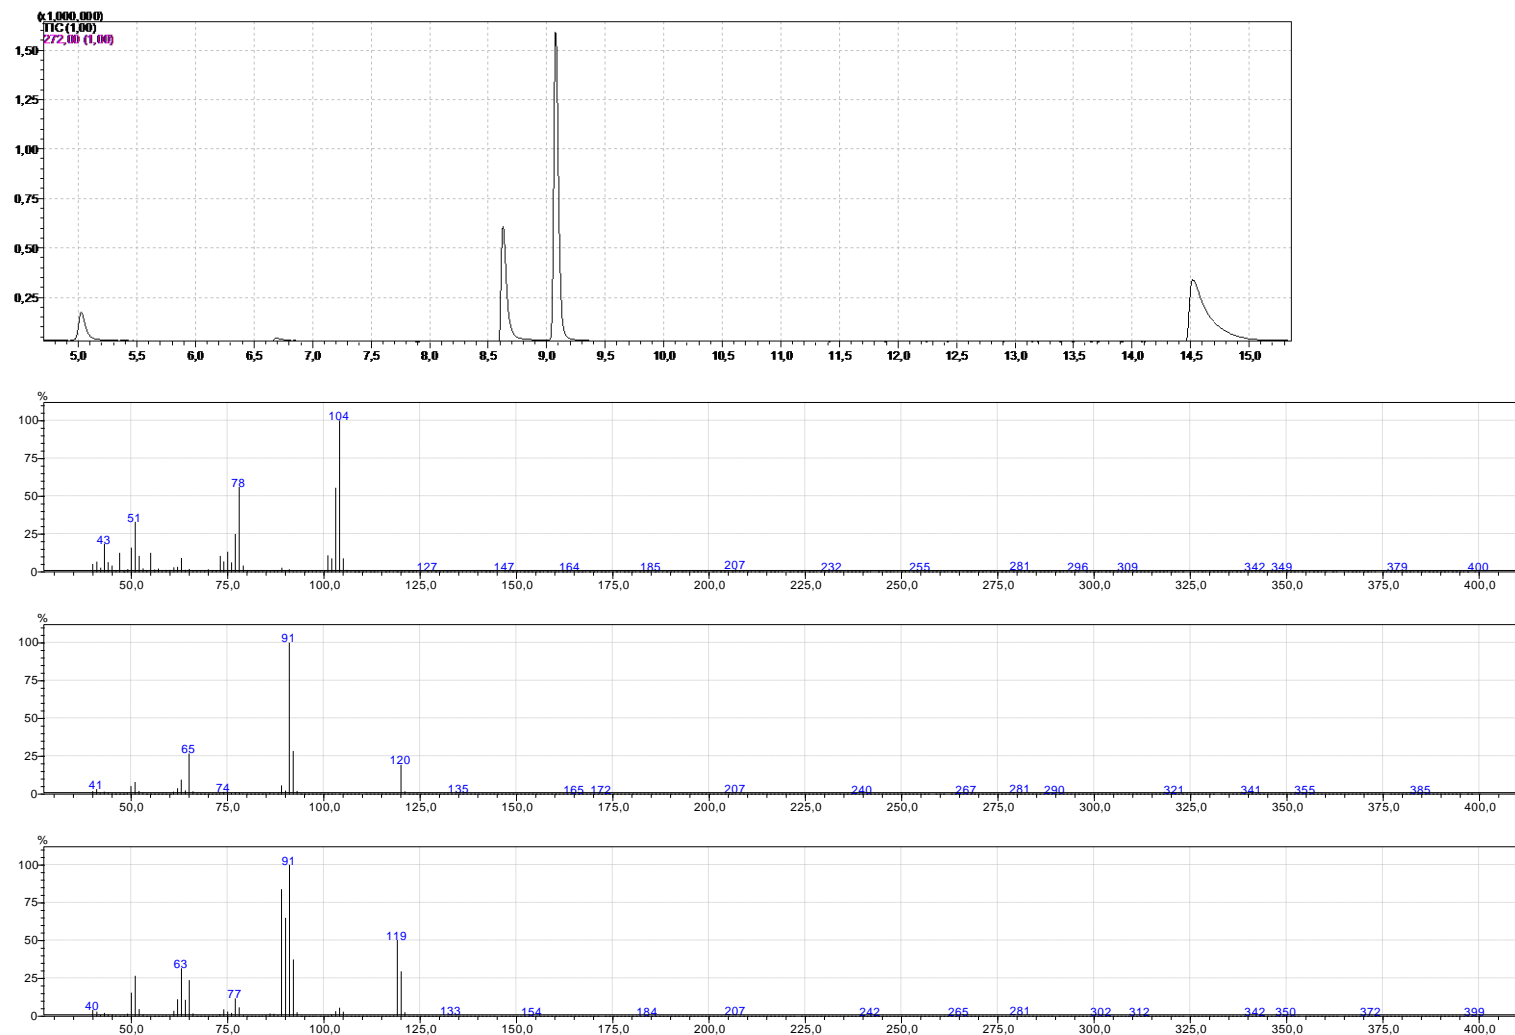

**Figure S20:** GC and MS chromatograms of conversion of **11**. Reactions were conducted in 50 mM sodium phosphate buffer pH 7.0 with 2 mM  $\text{MgCl}_2$ , 1 mM substrate, 4 mM hydrogen peroxide, 1.3  $\mu\text{M}$  *AbrUPO*, 8 mM ascorbate at 25 °C and 600 rpm for 180 min. MS chromatograms of **11** (5.053 min), **11a** (8.628 min) and **11b** (9.078 min) in sorted order.

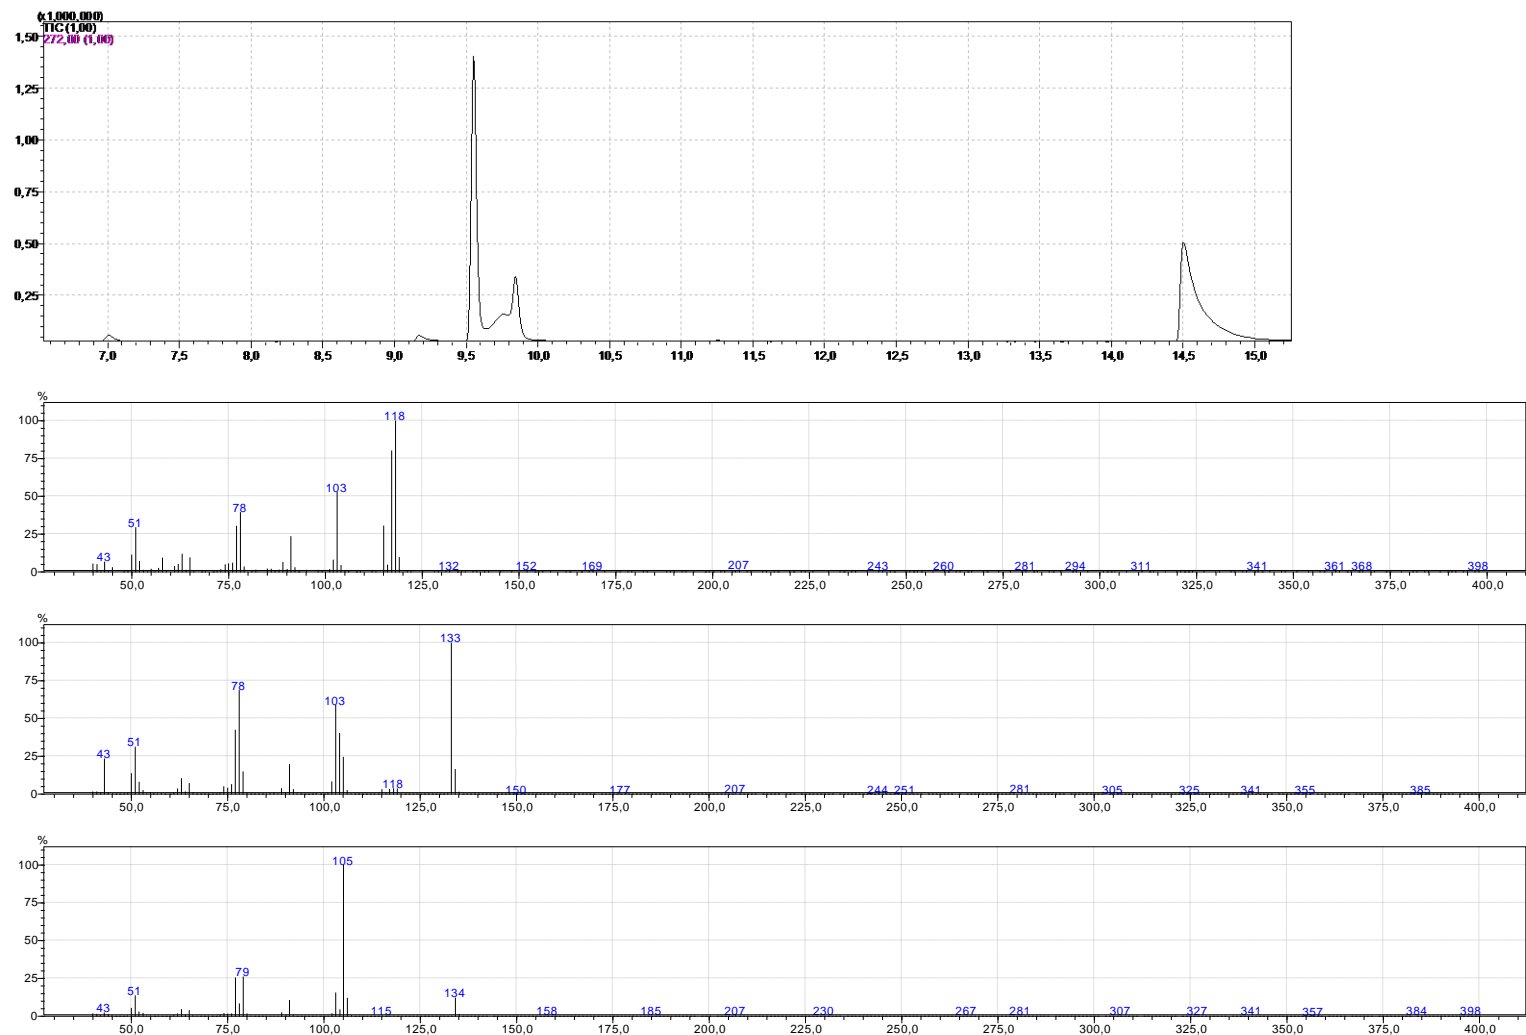

**Figure S21:** GC and MS chromatograms of conversion of **12**. Reactions were conducted in 50 mM sodium phosphate buffer pH 7.0 with 2 mM  $\text{MgCl}_2$ , 1 mM substrate, 4 mM hydrogen peroxide, 1.3  $\mu\text{M}$  *AbrUPO*, 8 mM ascorbate at 25 °C and 600 rpm for 180 min. MS chromatograms of **12** (6.986 min), **12a** (9.553 min) and **12b** (9.845 min) in sorted order.

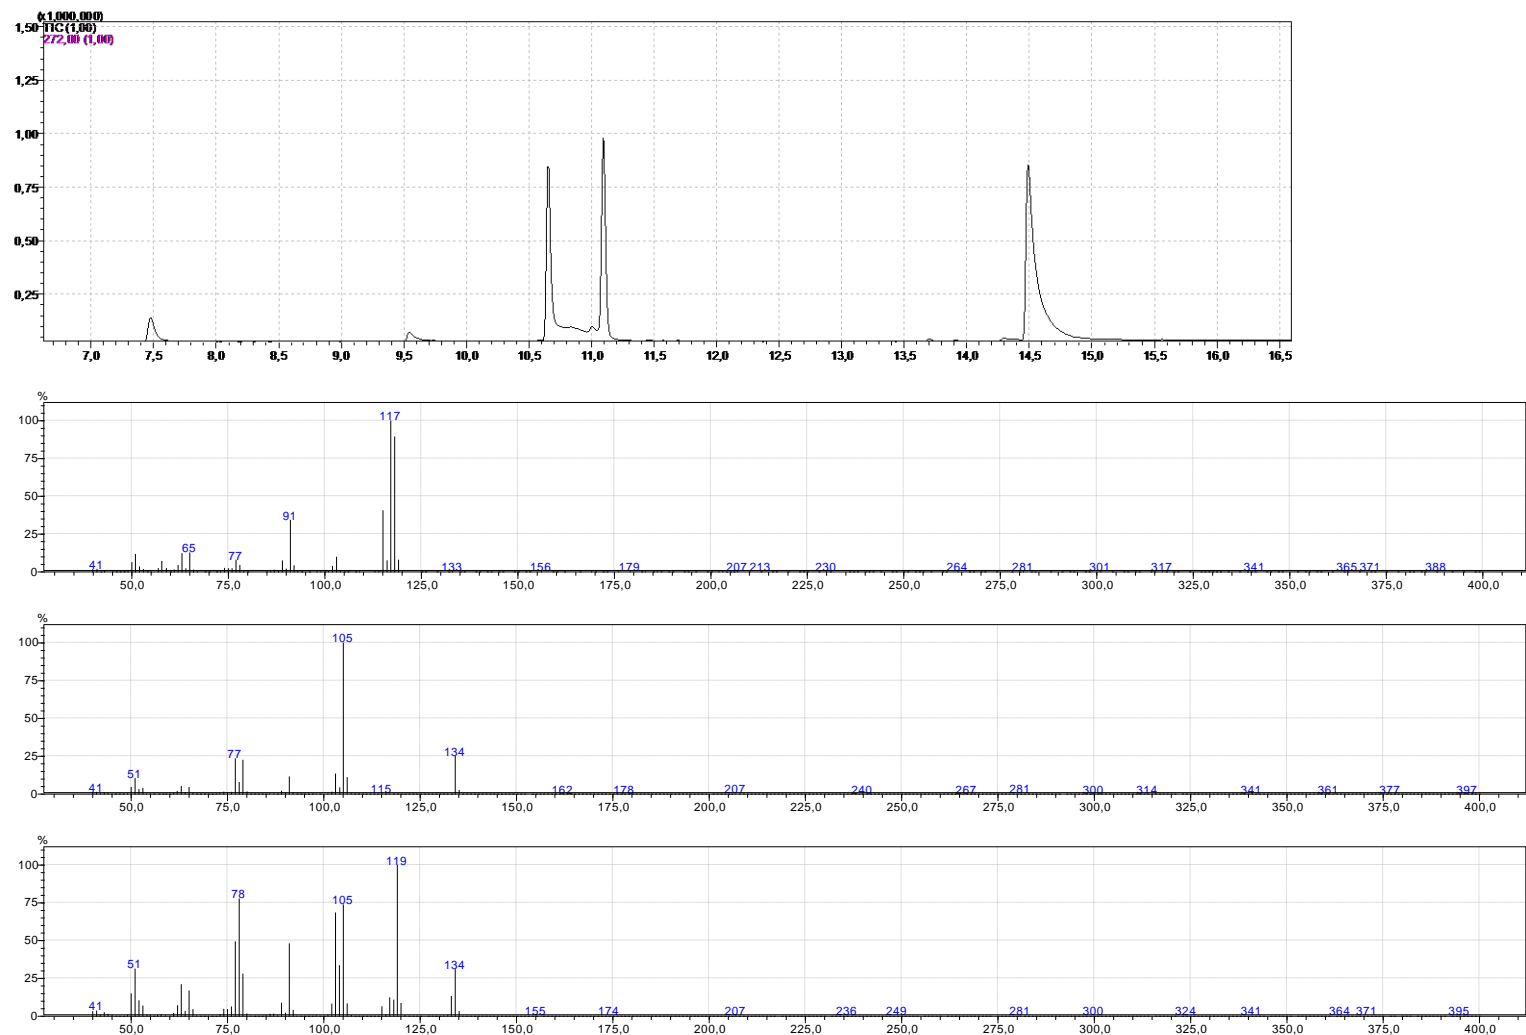

**Figure S22:** GC and MS chromatograms of conversion of **13**. Reactions were conducted in 50 mM sodium phosphate buffer pH 7.0 with 2 mM  $\text{MgCl}_2$ , 1 mM substrate, 4 mM hydrogen peroxide, 1.3  $\mu\text{M}$  *AbrUPO*, 8 mM ascorbate at 25 °C and 600 rpm for 180 min. MS chromatograms of **13** (7.483 min), **13a** (10.654 min) and **13b** (11.095 min) in sorted order.

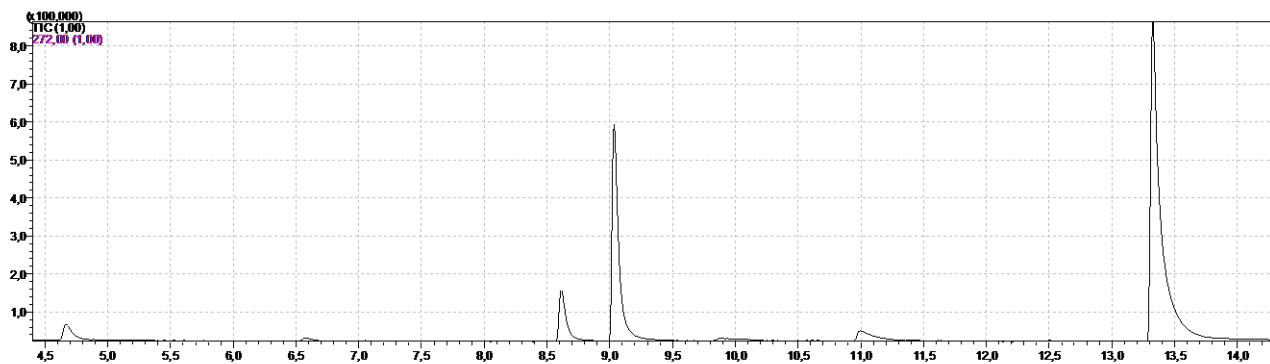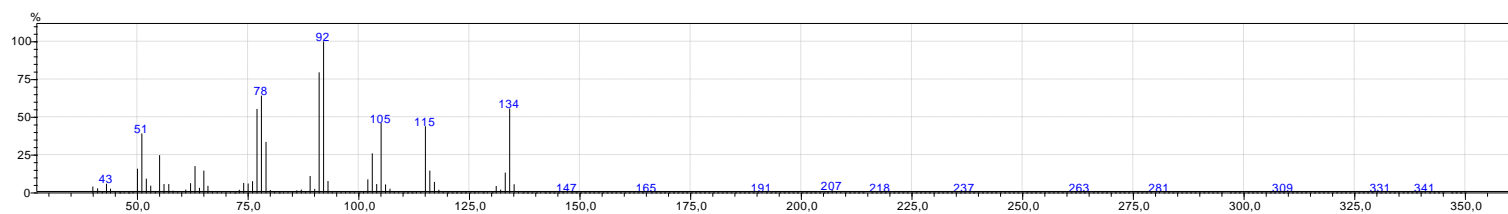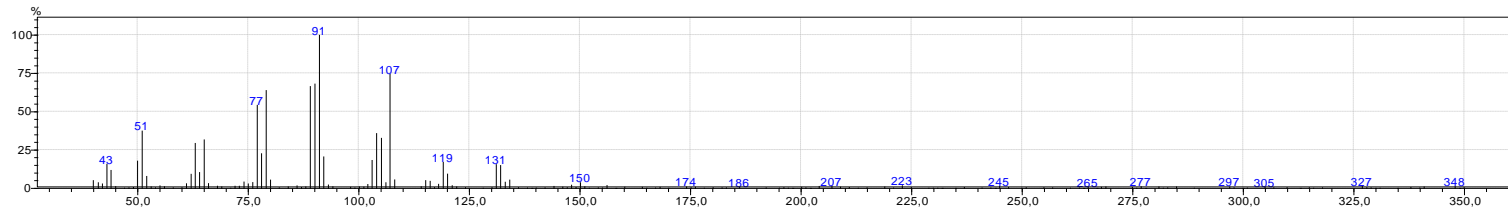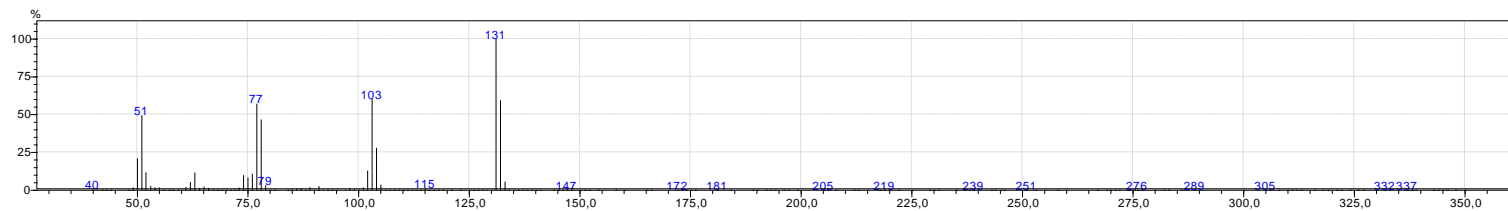

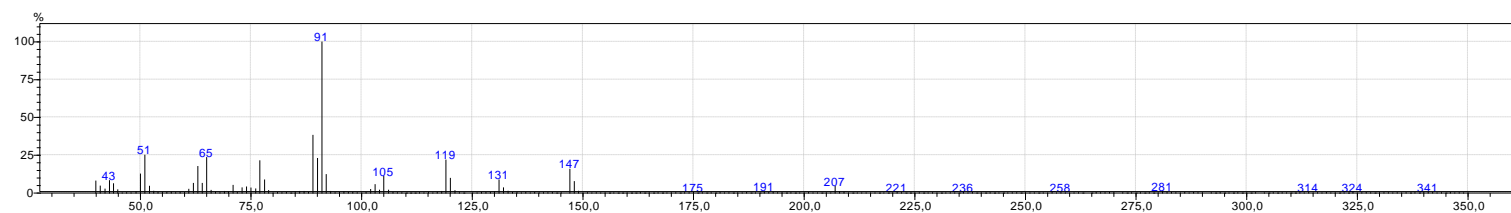

**Figure S23:** GC and MS chromatograms of conversion of **14**. Reactions were conducted in 50 mM sodium phosphate buffer pH 7.0 with 2 mM  $\text{MgCl}_2$ , 1 mM substrate, 4 mM hydrogen peroxide, 1.3  $\mu\text{M}$  *AbrUPO*, 8 mM ascorbate at 25 °C and 600 rpm for 180 min. MS chromatograms of **14** (9.738 min), **14a** (10.994 min), **14b** (9.033 min) and **14c** (8.619 min) in sorted order.

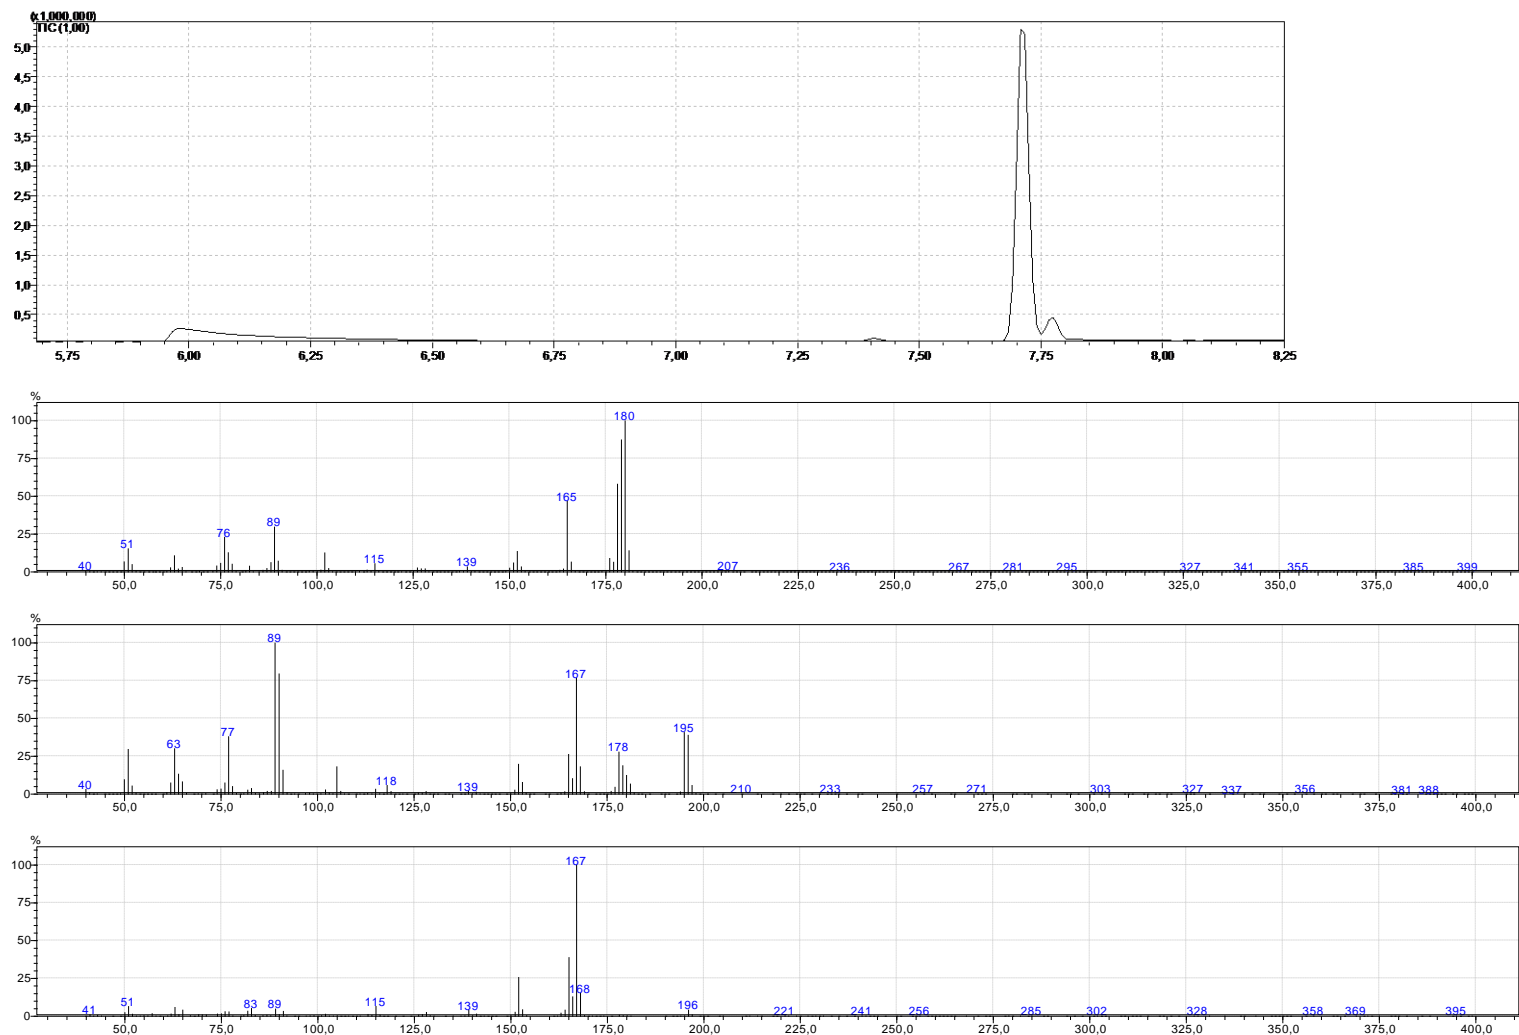

**Figure S24:** GC and MS chromatograms of conversion of **15**. Reactions were conducted in 50 mM sodium phosphate buffer pH 7.0 with 2 mM  $\text{MgCl}_2$ , 1 mM substrate, 4 mM hydrogen peroxide, 1.3  $\mu\text{M}$  *AbrUPO*, 8 mM ascorbate at 25 °C and 600 rpm for 180 min. MS chromatograms of **15** (7.709 min), **15a** (7.771 min) and **15b** (7.407 min) in sorted order.

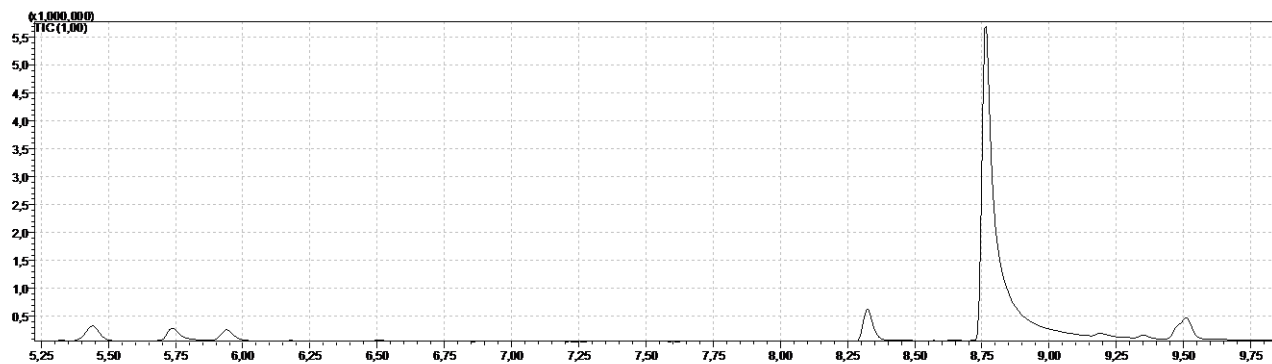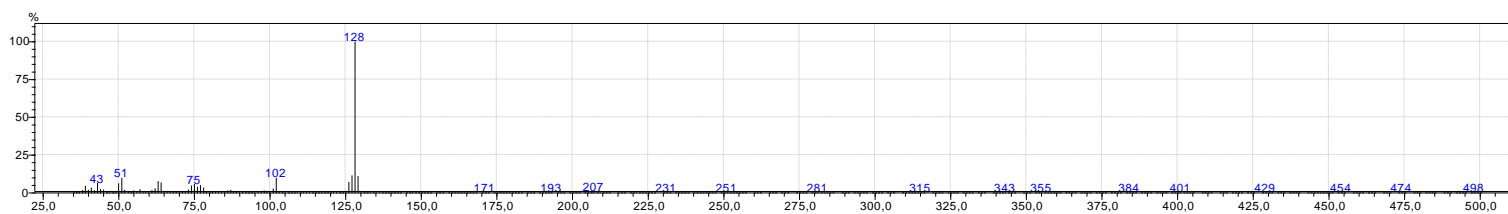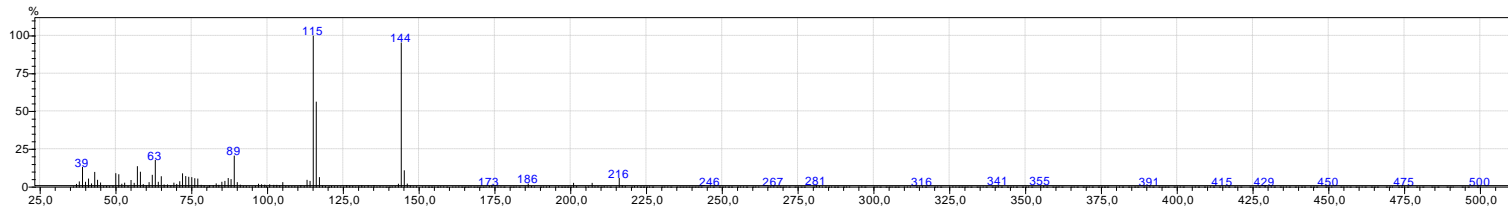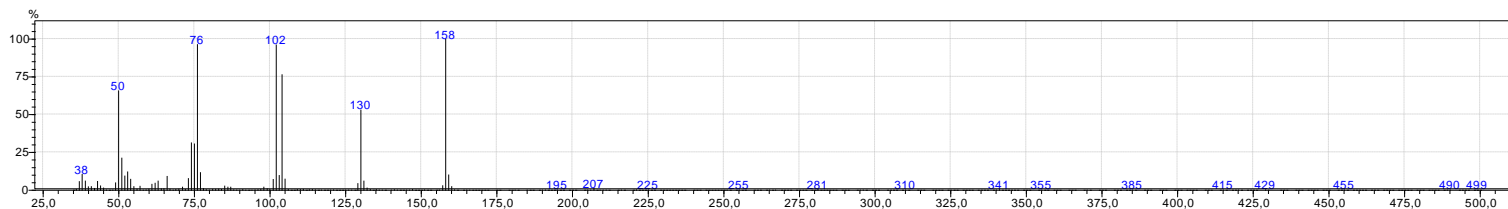

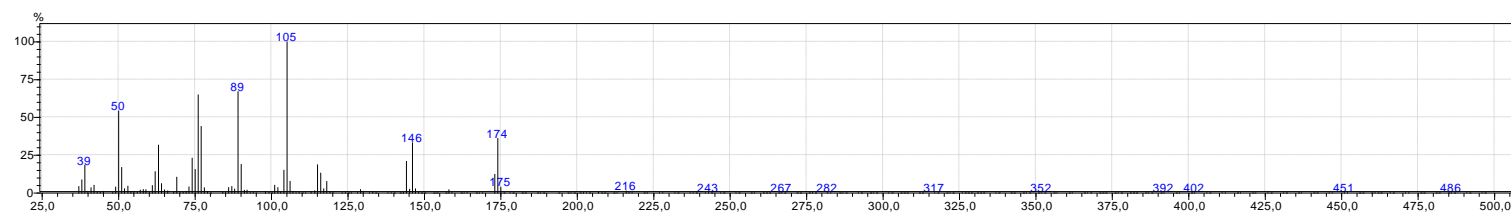

**Figure S25:** GC and MS chromatograms of conversion of **16**. Reactions were conducted in 50 mM sodium phosphate buffer pH 7.0 with 2 mM  $\text{MgCl}_2$ , 1 mM substrate, 4 mM hydrogen peroxide, 1.3  $\mu\text{M}$  *AbrUPO*, 8 mM ascorbate at 25 °C and 600 rpm for 180 min. MS chromatograms of **16** (5.441 min), **16a** (9.950 min), **16b** (8.324 min) and **16c** (9.510min) in sorted order.

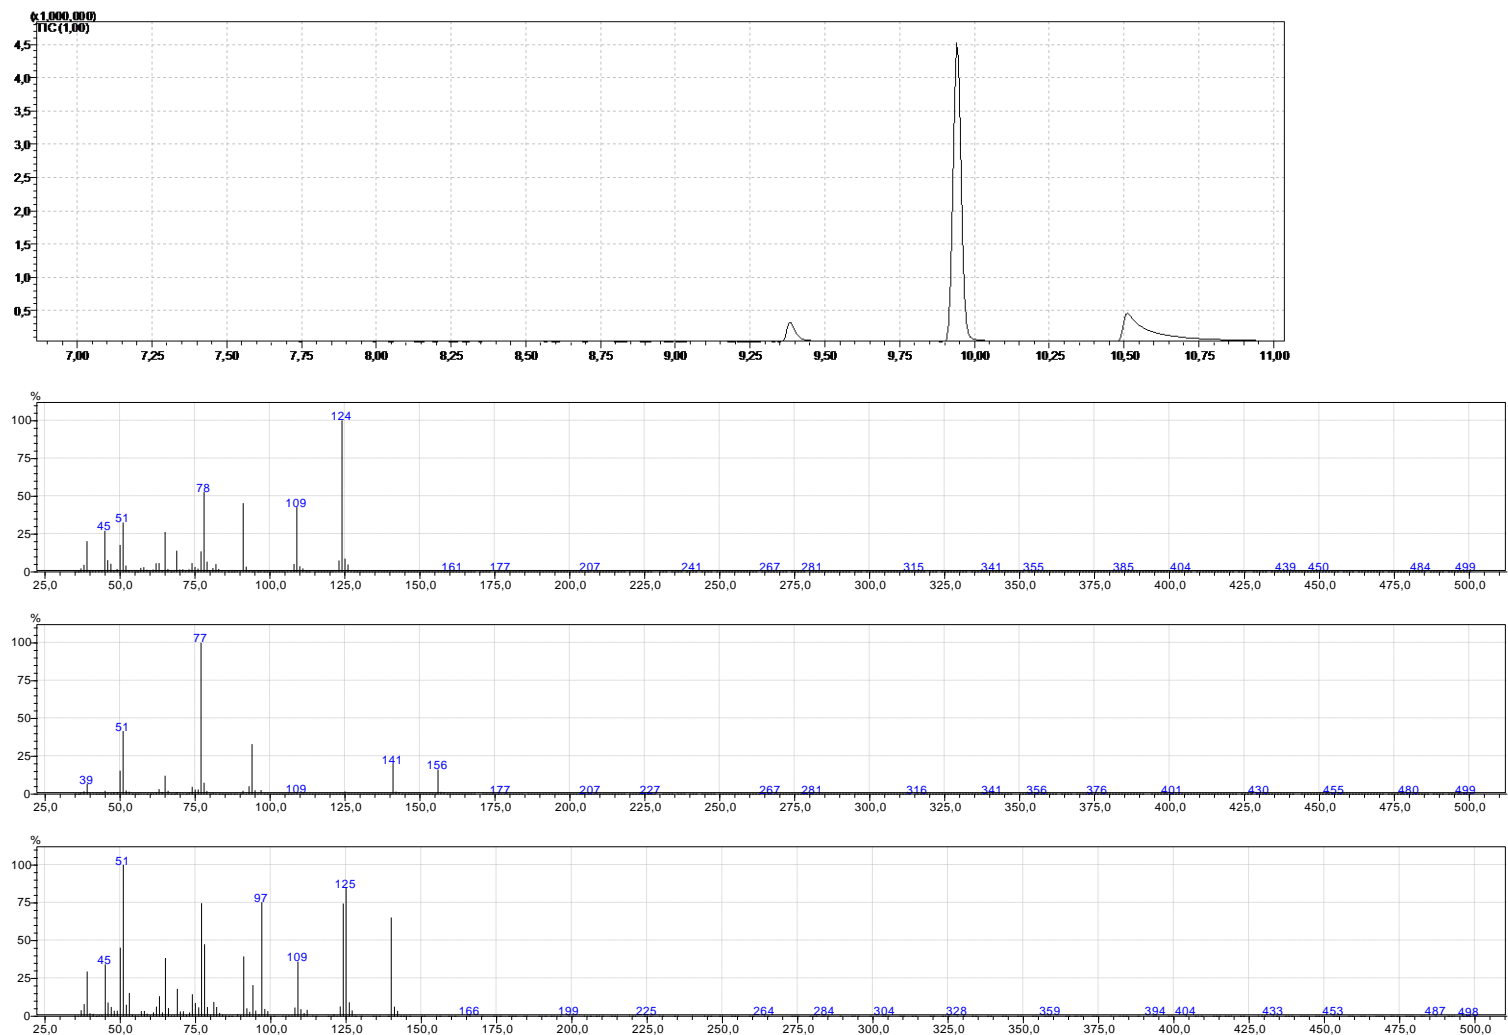

**Figure S26:** GC and MS chromatograms of conversion of **17**. Reactions were conducted in 50 mM sodium phosphate buffer pH 7.0 with 2 mM  $\text{MgCl}_2$ , 1 mM substrate, 4 mM hydrogen peroxide, 1.3  $\mu\text{M}$  *AbrUPO*, 8 mM ascorbate at 25 °C and 600 rpm for 180 min. MS chromatograms of **17** (6.850 min), **17a** (9.942 min) and **17b** (9.383 min) in sorted order.

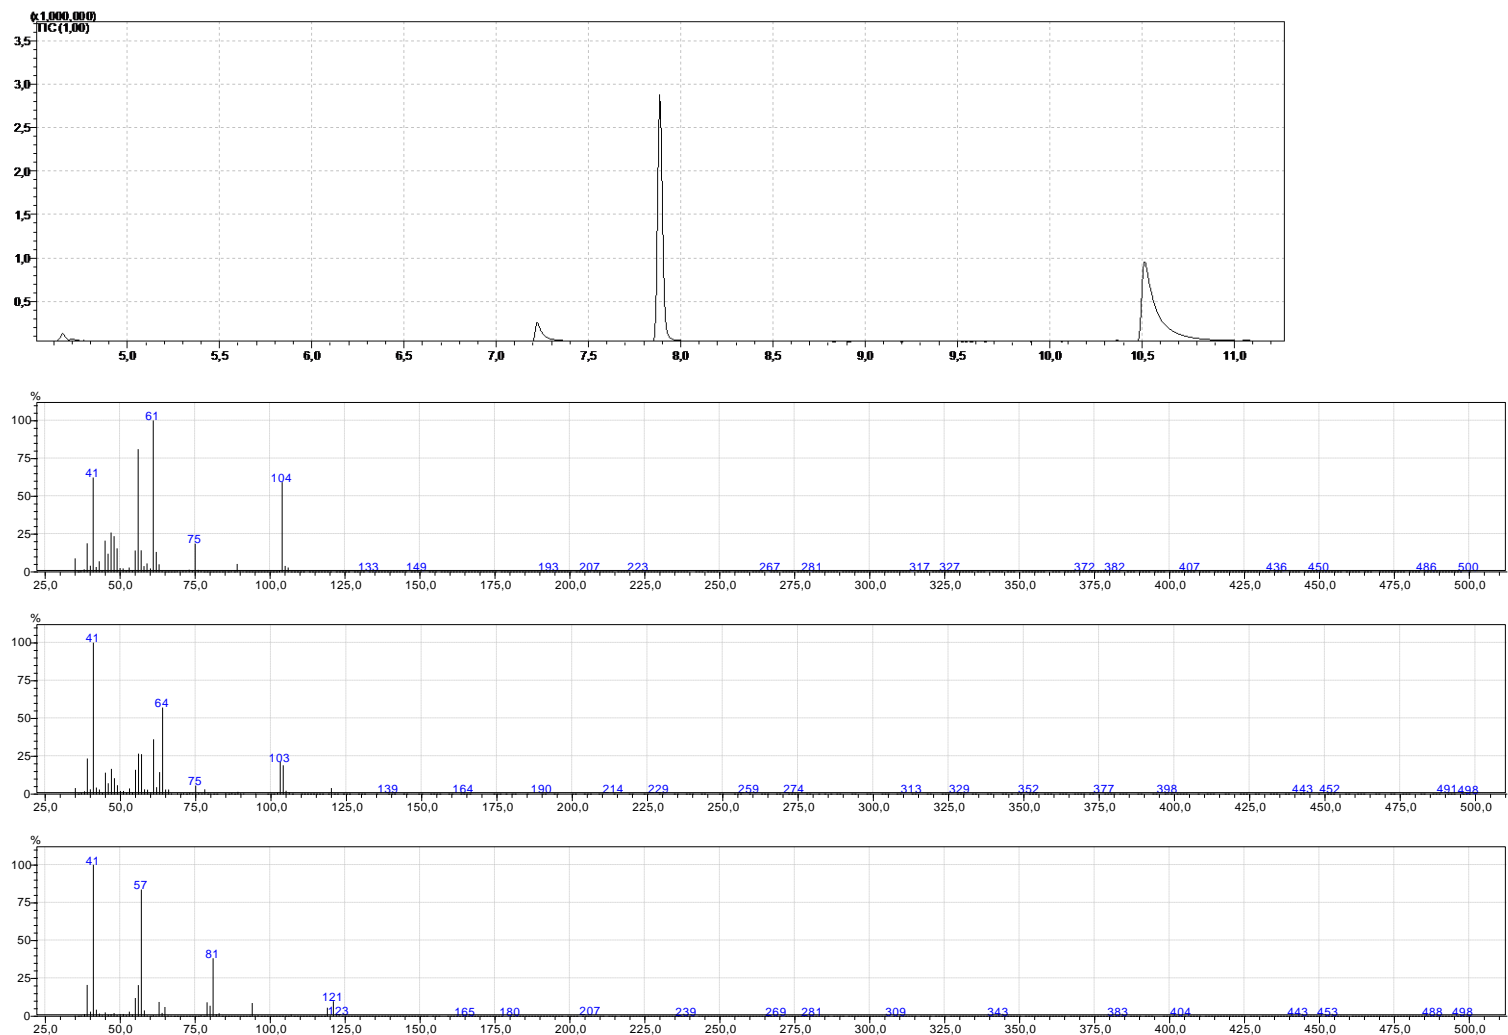

**Figure S27:** GC and MS chromatograms of conversion of **18**. Reactions were conducted in 50 mM sodium phosphate buffer pH 7.0 with 2 mM  $\text{MgCl}_2$ , 1 mM substrate, 4 mM hydrogen peroxide, 1.3  $\mu\text{M}$  *AbrUPO*, 8 mM ascorbate at 25 °C and 600 rpm for 180 min. MS chromatograms of **18** (3.833 min), **18a** (7.222 min) and **18b** (7.887 min) in sorted order.

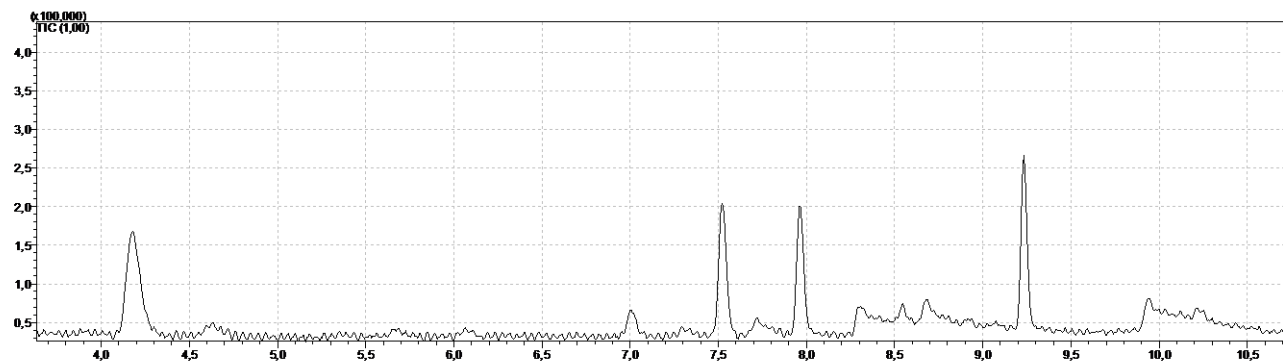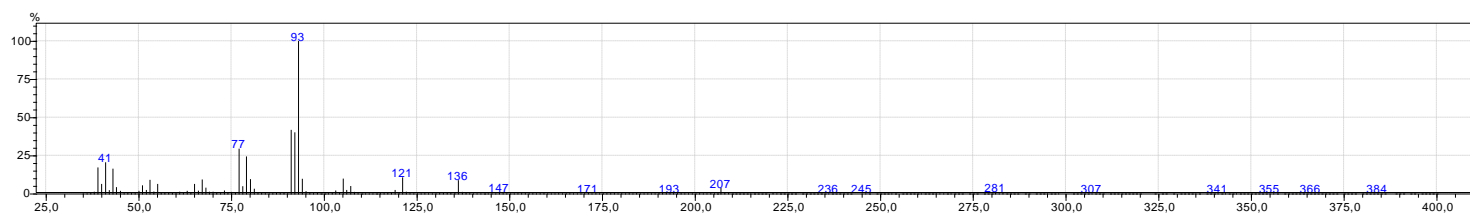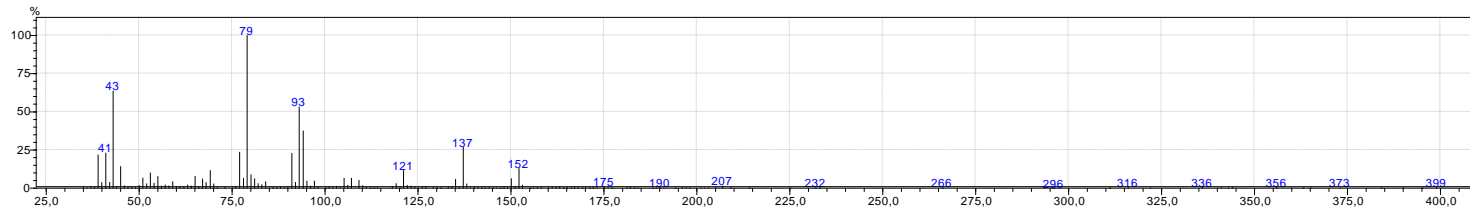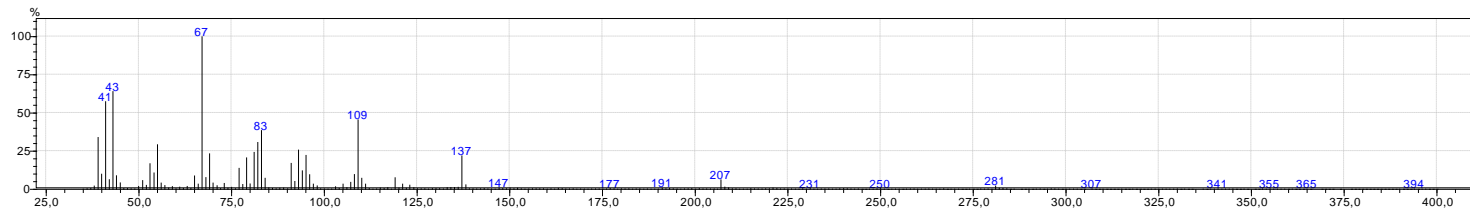

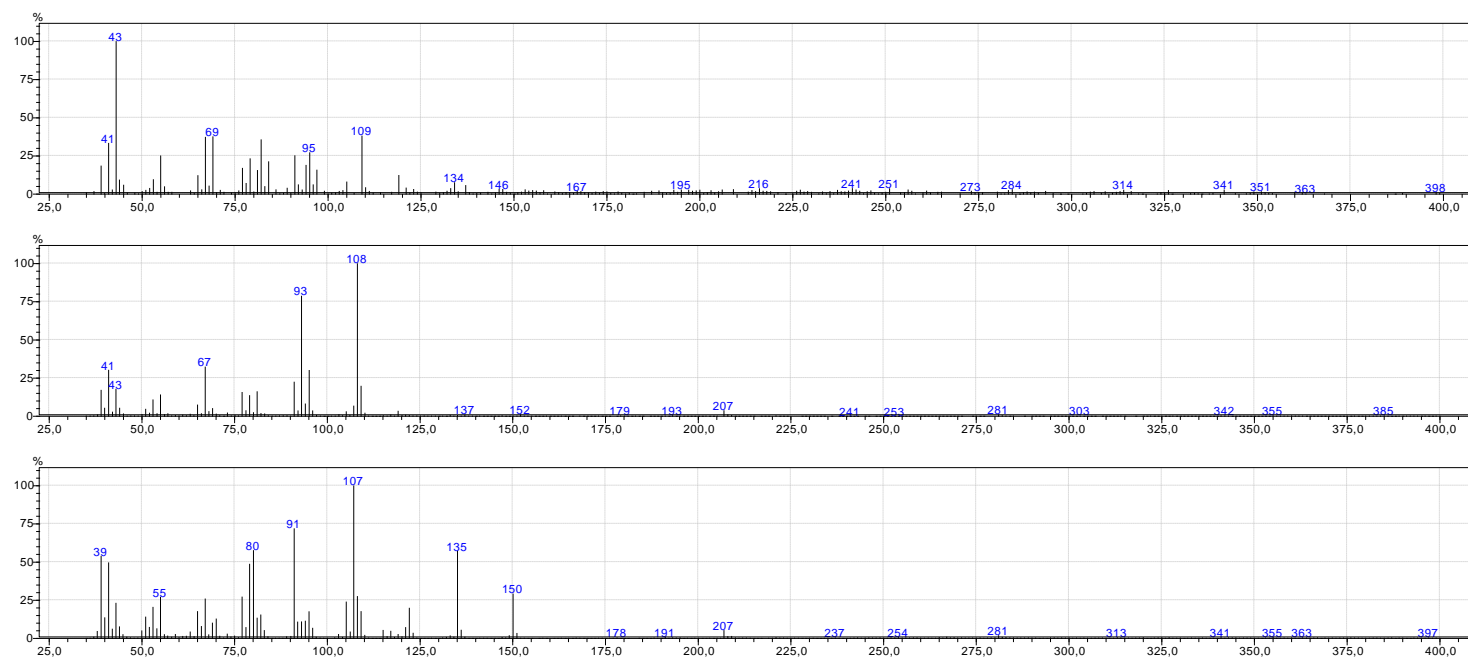

**Figure S28:** GC and MS chromatograms of conversion of **19**. Reactions were conducted in 50 mM sodium phosphate buffer pH 7.0 with 2 mM  $\text{MgCl}_2$ , 1 mM substrate, 4 mM hydrogen peroxide, 1.3  $\mu\text{M}$  *AbrUPO*, 8 mM ascorbate at 25 °C and 600 rpm for 180 min. MS chromatograms of **19** (4.178 min), **19a** (7.020min), **19b** (7.522 min), **19c** (7.722 min), **19d** (7.964 min) and **19e** (9.234 min) in sorted order.

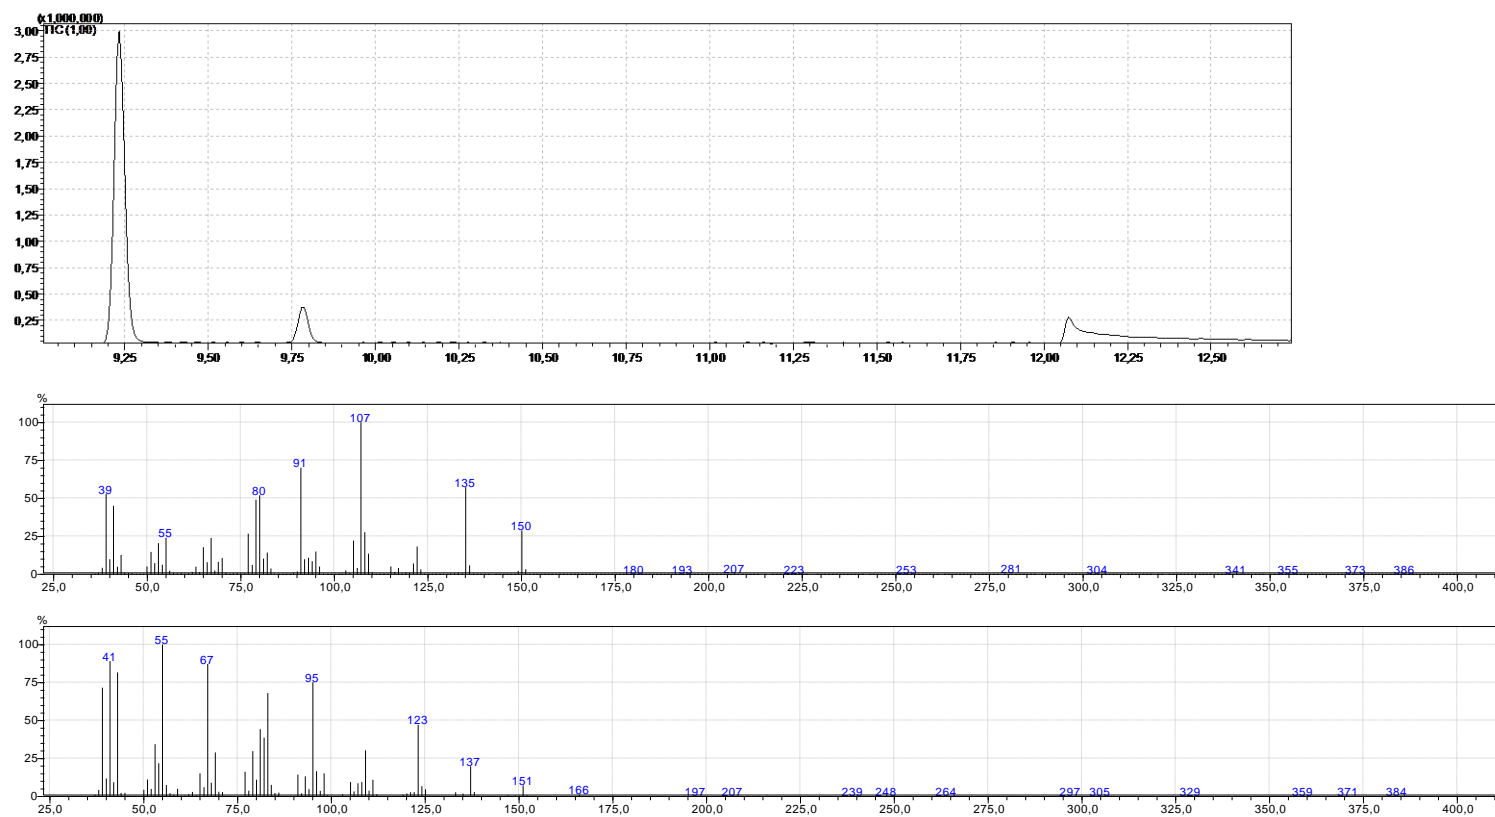

**Figure S29:** GC and MS chromatograms of conversion of **20**. Reactions were conducted in 50 mM sodium phosphate buffer pH 7.0 with 2 mM  $\text{MgCl}_2$ , 1 mM substrate, 4 mM hydrogen peroxide, 1.3  $\mu\text{M}$  *AbrUPO*, 8 mM ascorbate at 25 °C and 600 rpm for 180 min. MS chromatograms of **20** (9.223 min) and **20a** (9.783 min) in sorted order.

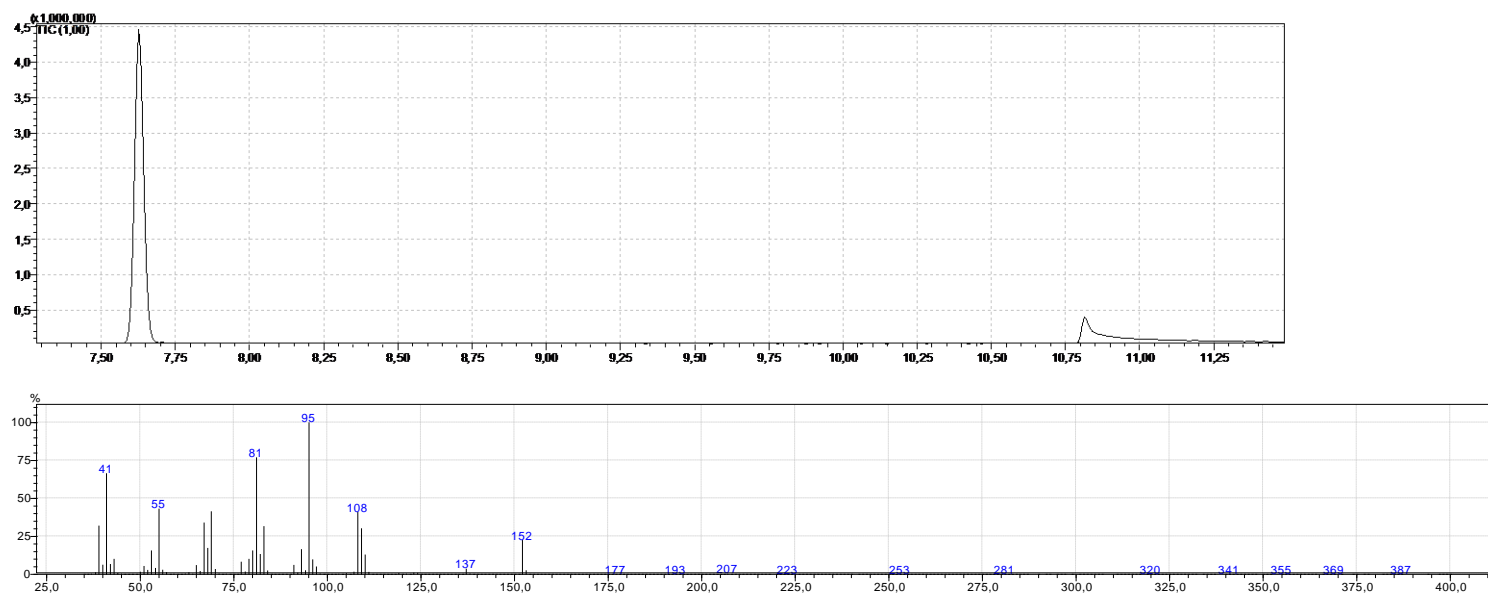

**Figure S30:** GC and MS chromatograms of conversion of **21** (7.632 min). Reactions were conducted in 50 mM sodium phosphate buffer pH 7.0 with 2 mM  $\text{MgCl}_2$ , 1 mM substrate, 4 mM hydrogen peroxide, 1.3  $\mu\text{M}$  *AbrUPO*, 8 mM ascorbate at 25 °C and 600 rpm for 180 min.

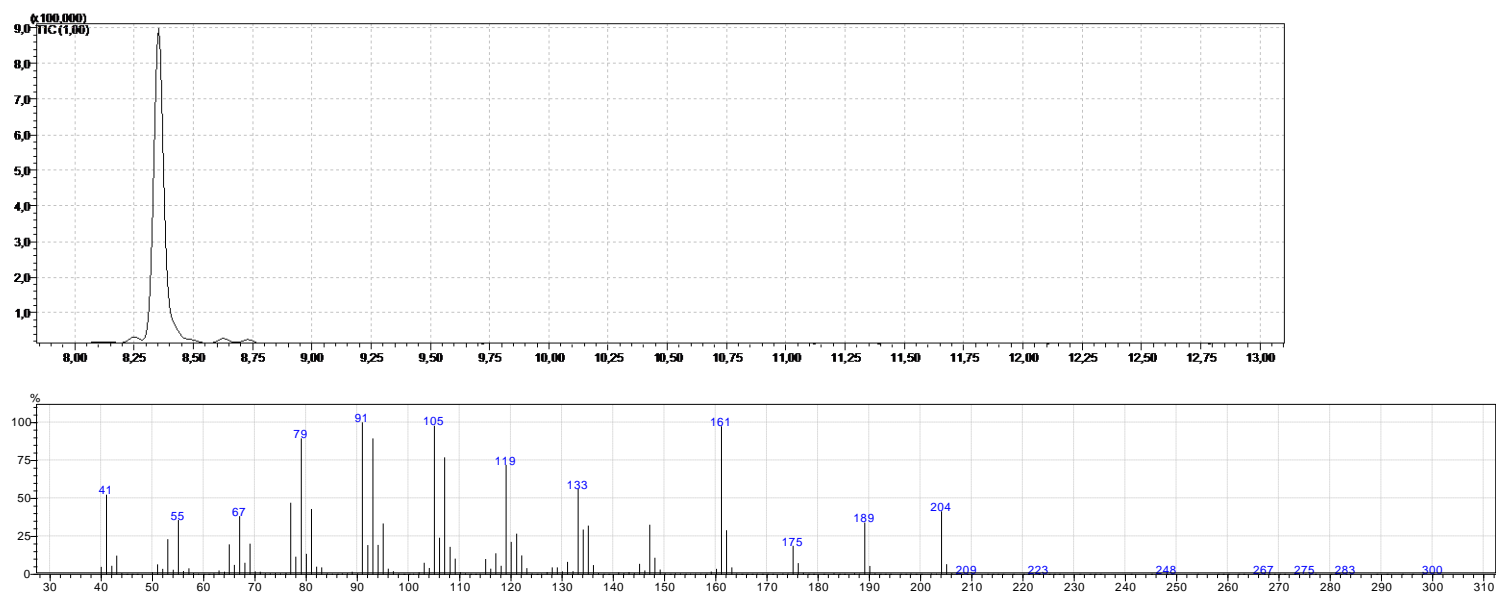

**Figure S31:** GC and MS chromatograms of conversion of **22** (8.365 min). Reactions were conducted in 50 mM sodium phosphate buffer pH 7.0 with 2 mM MgCl<sub>2</sub>, 1 mM substrate, 4 mM hydrogen peroxide, 1.3  $\mu$ M *AbrUPO*, 8 mM ascorbate at 25 °C and 600 rpm for 180 min.

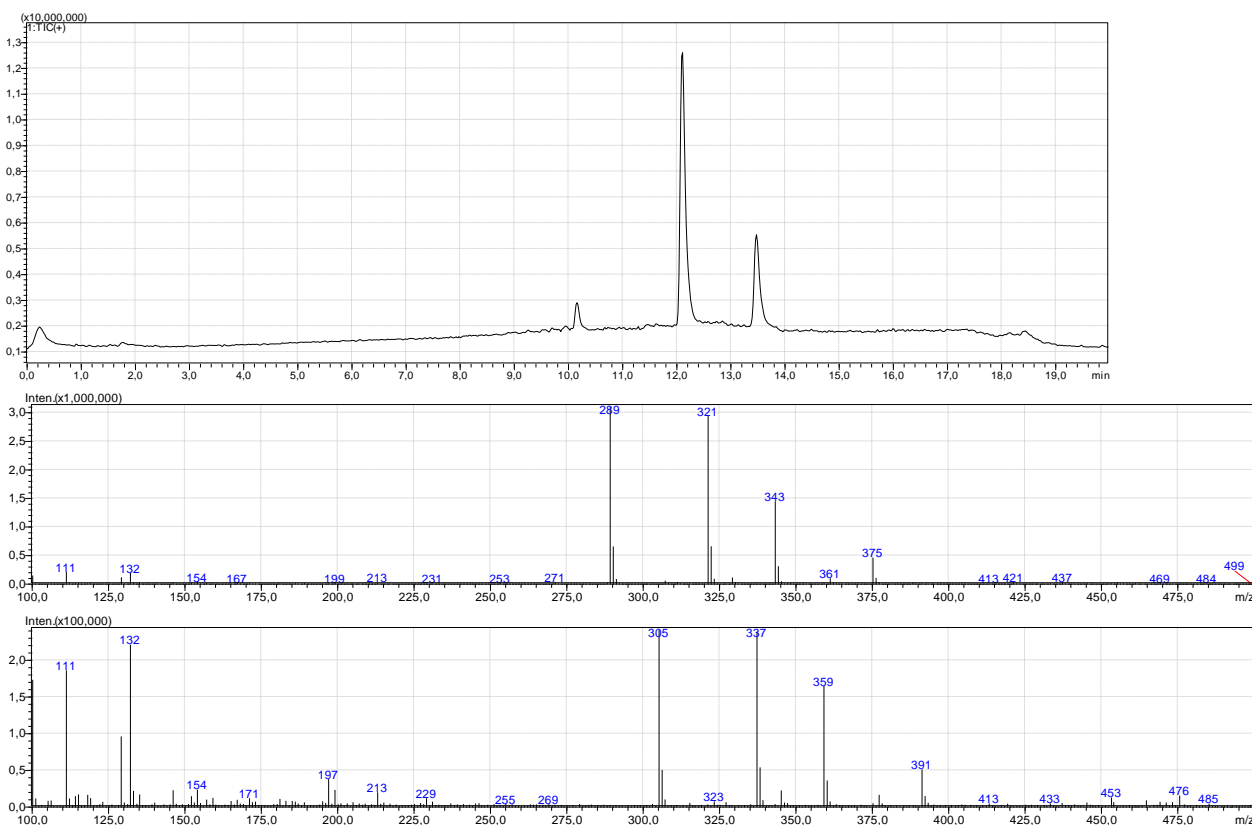

**Figure S32:** LC and MS chromatograms of conversion of **23**. Reactions were conducted in 50 mM sodium phosphate buffer pH 7.0 with 2 mM  $\text{MgCl}_2$ , 1 mM substrate, 4 mM hydrogen peroxide, 1.3  $\mu\text{M}$  *AbrUPO*, 8 mM ascorbate at 25 °C and 600 rpm for 180 min. MS chromatograms of **23** (12.100 min) and **23a** (10.150 min) in sorted order.

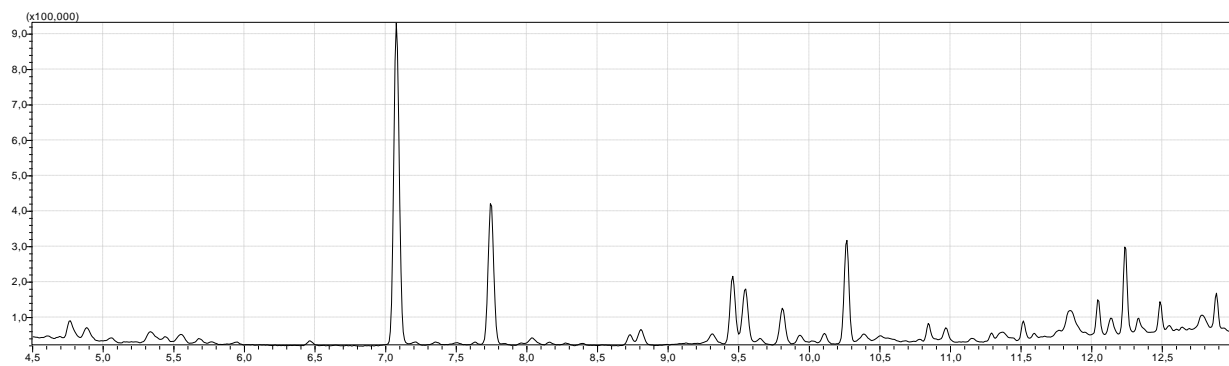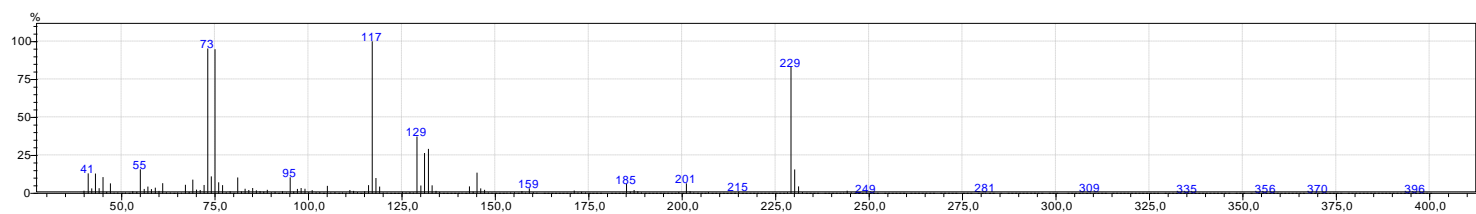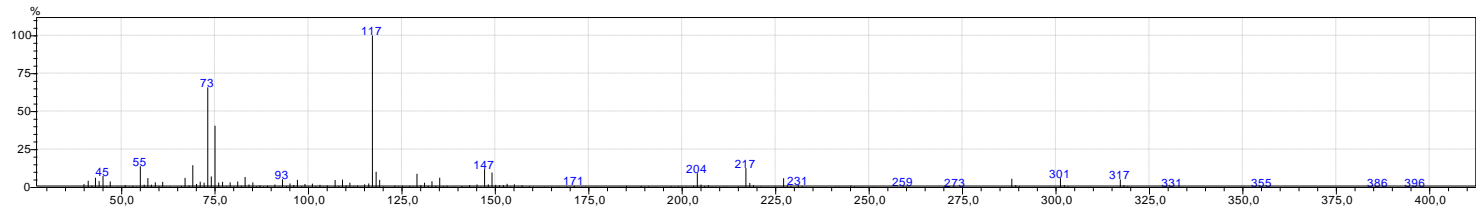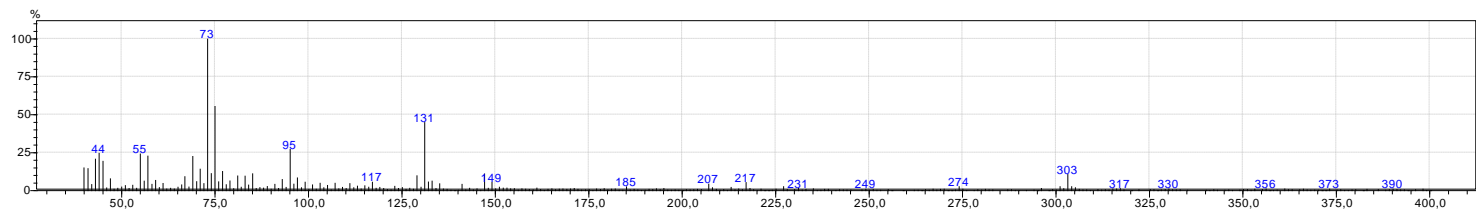

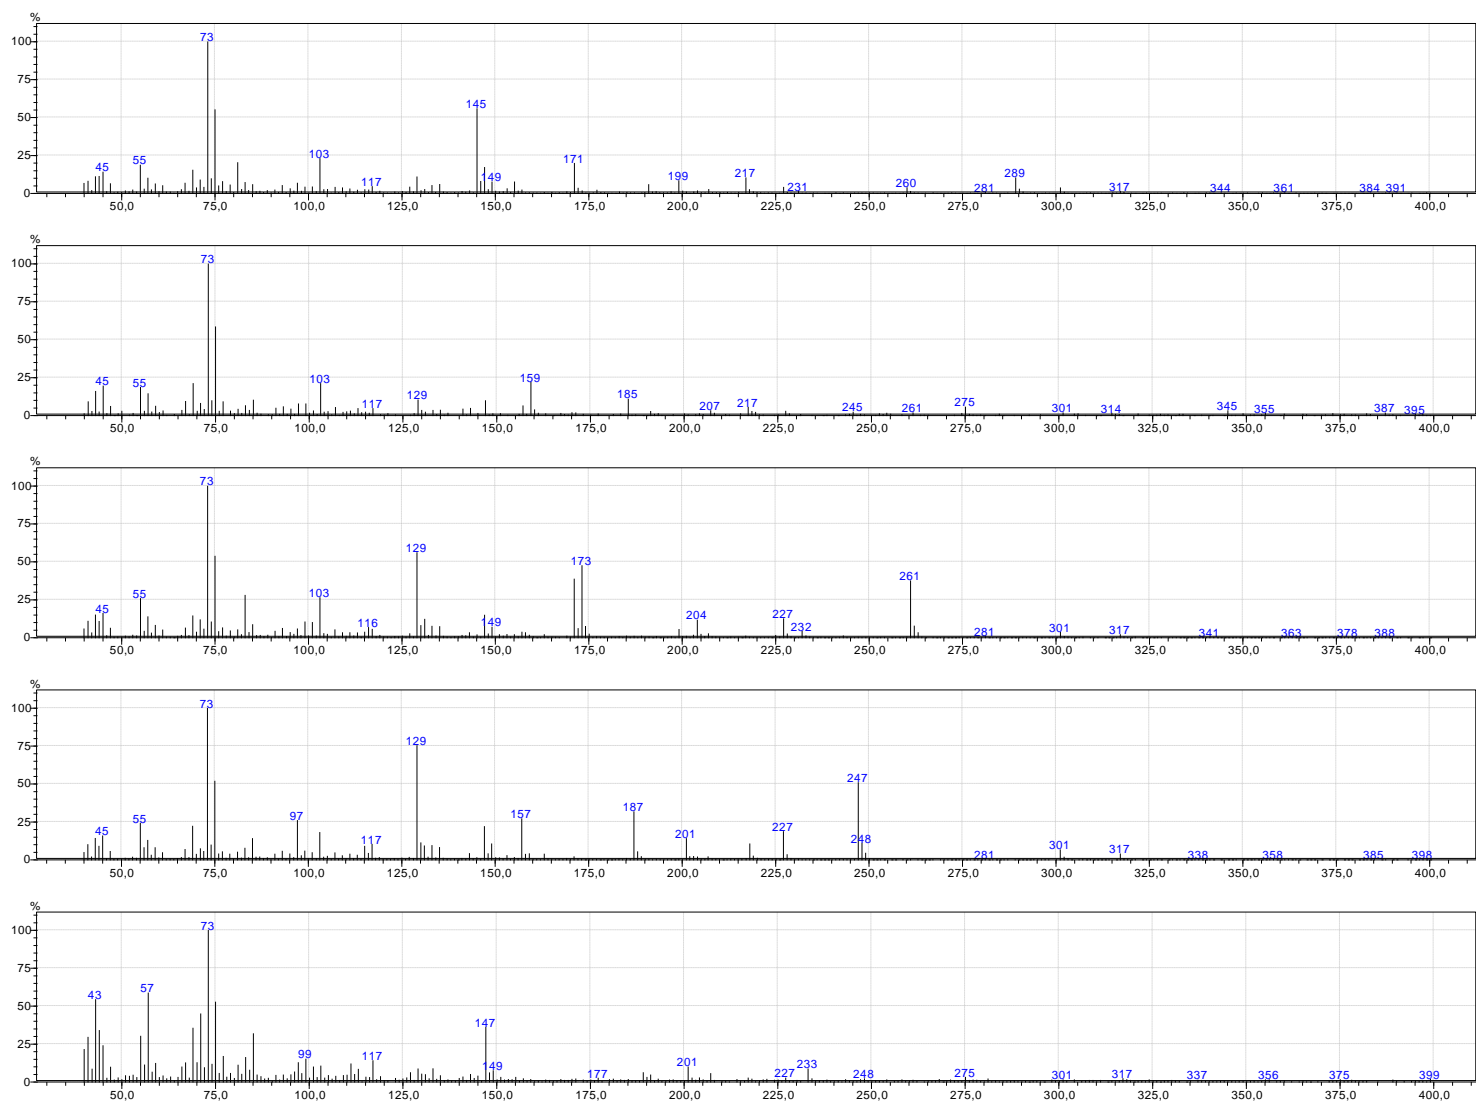

**Figure S33:** GC and MS chromatograms of conversion of **24**. Reactions were conducted in 50 mM sodium phosphate buffer pH 7.0 with 2 mM  $\text{MgCl}_2$ , 1 mM substrate, 4 mM hydrogen peroxide, 1.3  $\mu\text{M}$  *AbrUPO*, 8 mM ascorbate at 25 °C and 600 rpm for 180 min. MS chromatograms of **24** (7.076 min),  $\omega$ -1 (10.270 min),  $\omega$ -2(10.115 min),  $\omega$ -3 (9.816 min),  $\omega$ -4 (9.653 min),  $\omega$ -5 (9.551 min),  $\omega$ -6 (9.463 min) and  $\omega$ -7 (9.313 min) in sorted order.

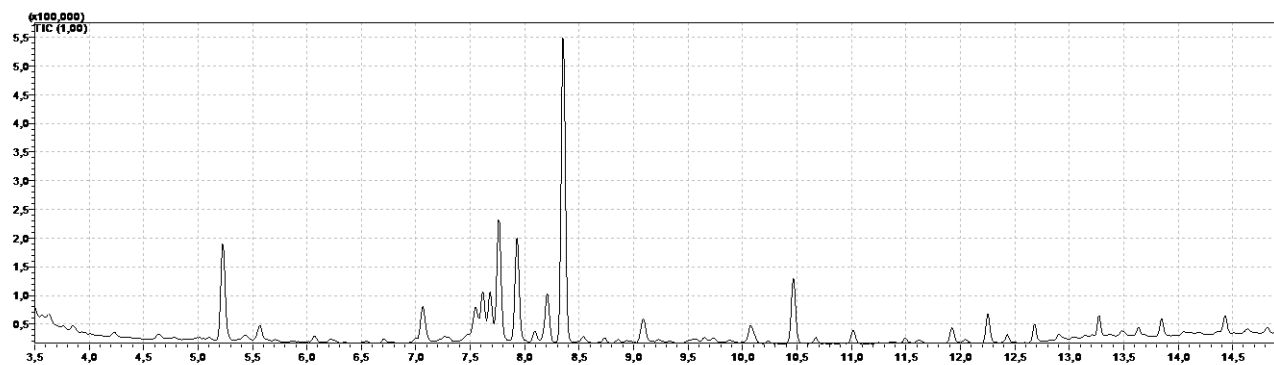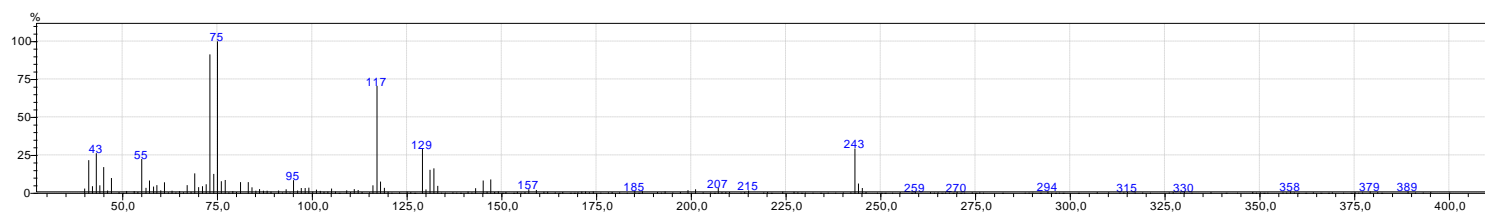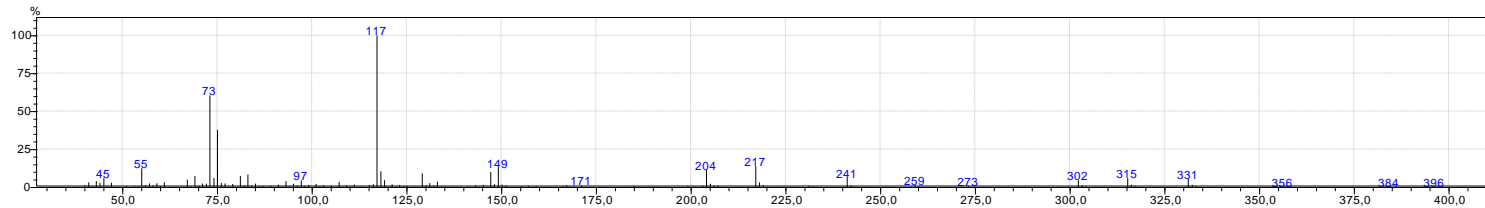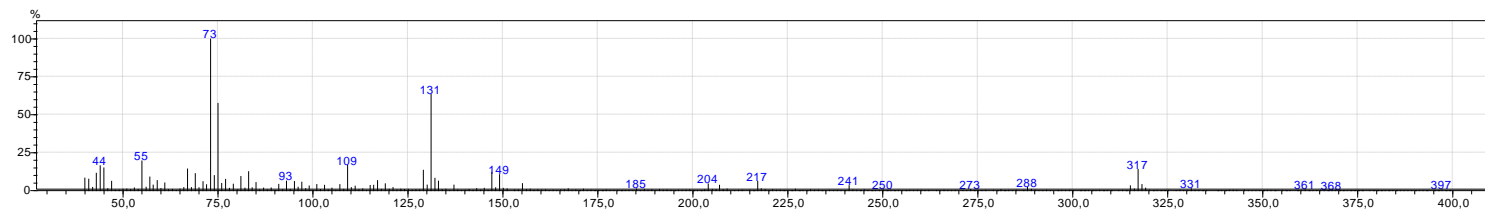

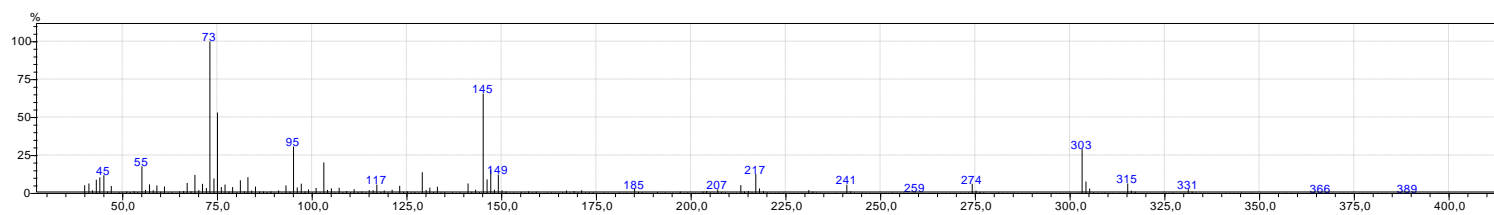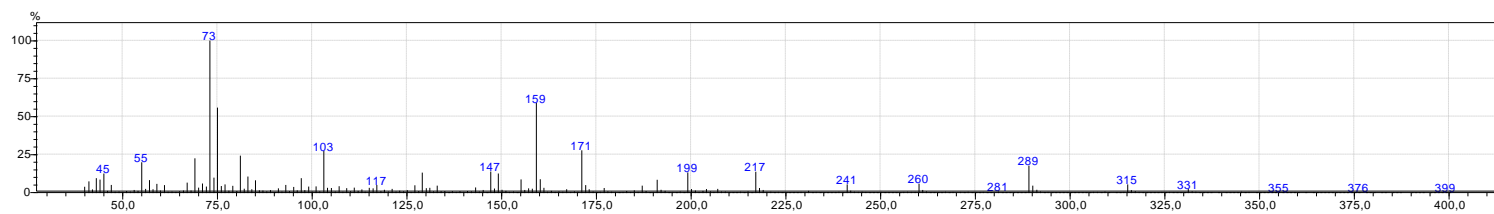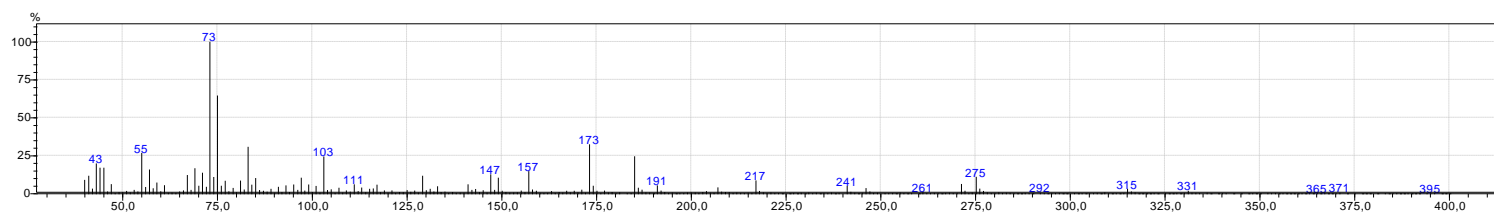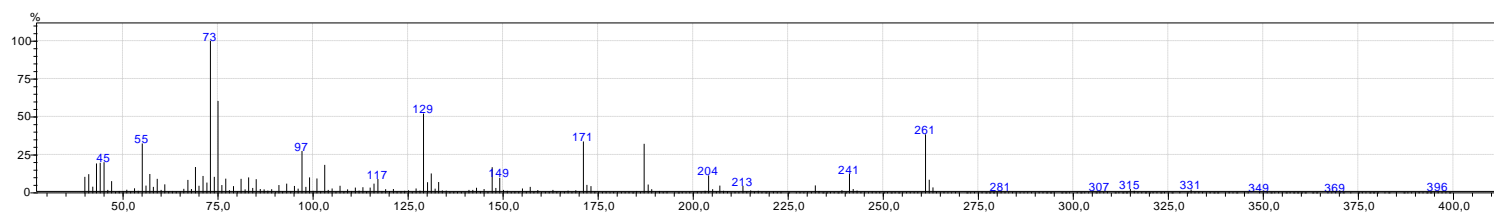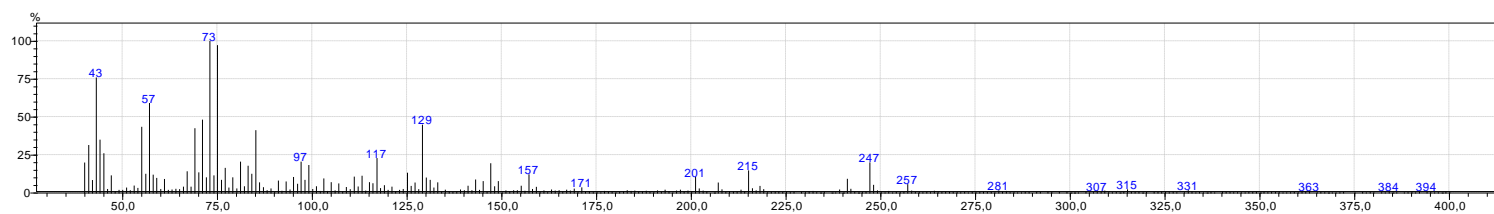

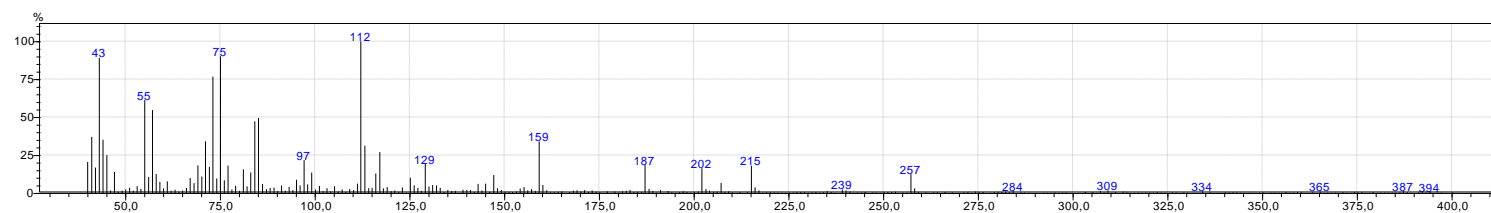

**Figure S34:** GC and MS chromatograms of conversion of **25**. Reactions were conducted in 50 mM sodium phosphate buffer pH 7.0 with 2 mM  $\text{MgCl}_2$ , 1 mM substrate, 4 mM hydrogen peroxide, 1.3  $\mu\text{M}$  *AbrUPO*, 8 mM ascorbate at 25 °C and 600 rpm for 180 min. MS chromatograms of **25** (5.567 min),  $\omega$ -1 (8.350 min),  $\omega$ -2 (8.209 min),  $\omega$ -3 (7.934min),  $\omega$ -4 (7.761 min),  $\omega$ -5 (7.685 min),  $\omega$ -6 (7.621 min),  $\omega$ -7 (7.554 min) and  $\omega$ -8 (7.067 min) in sorted order.

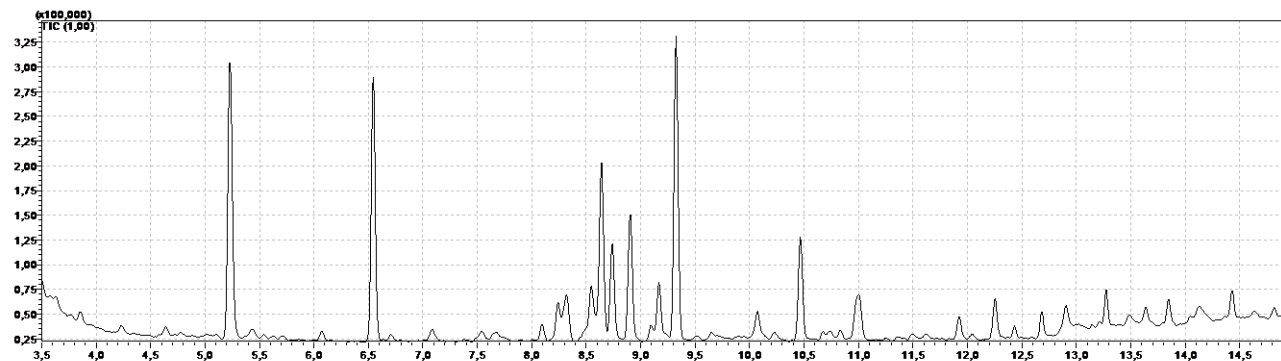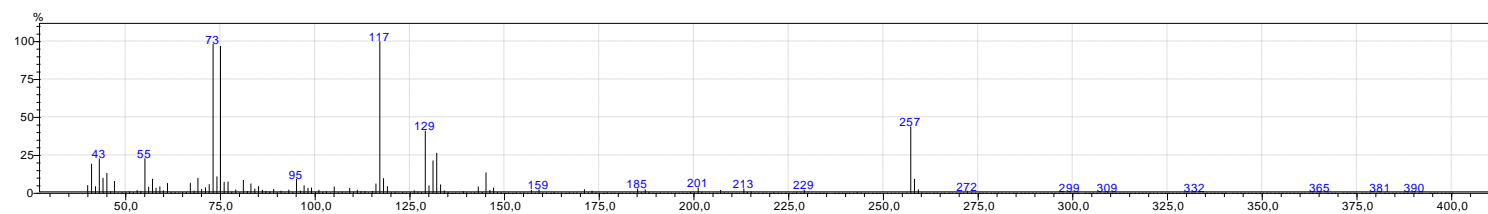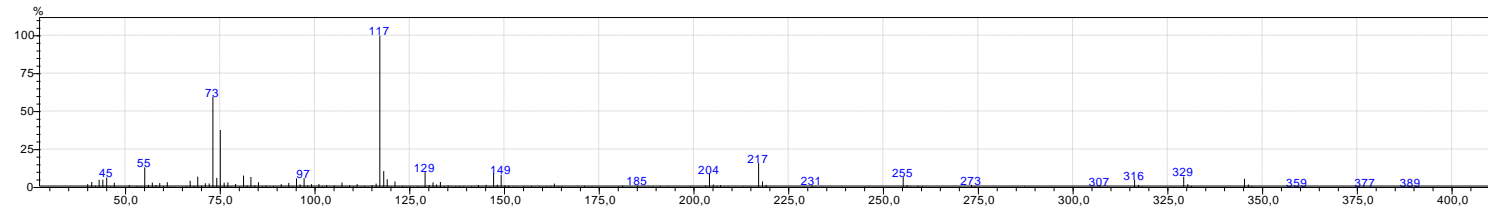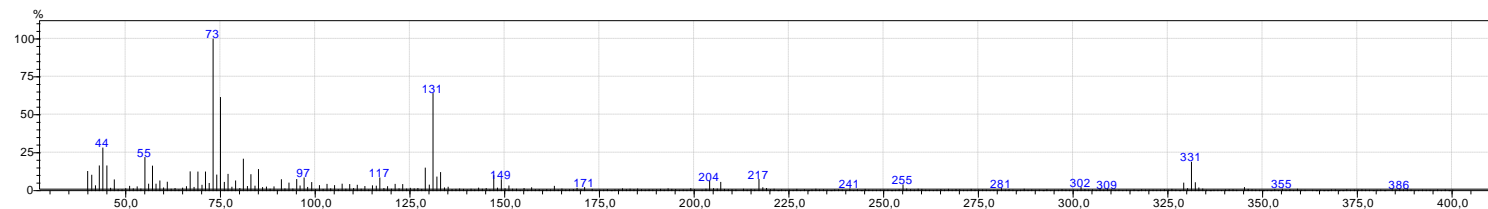

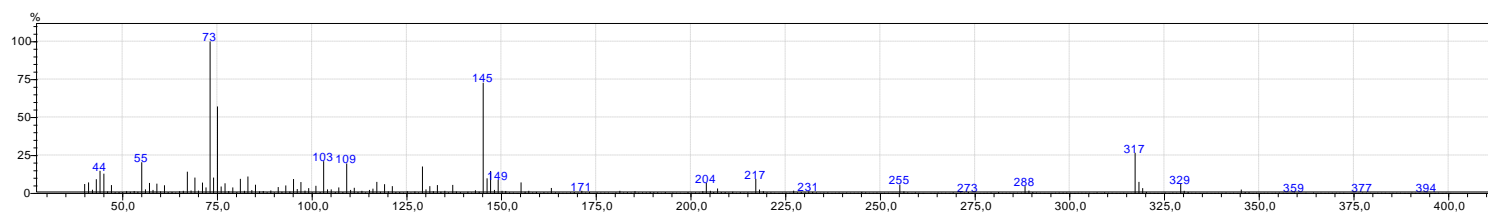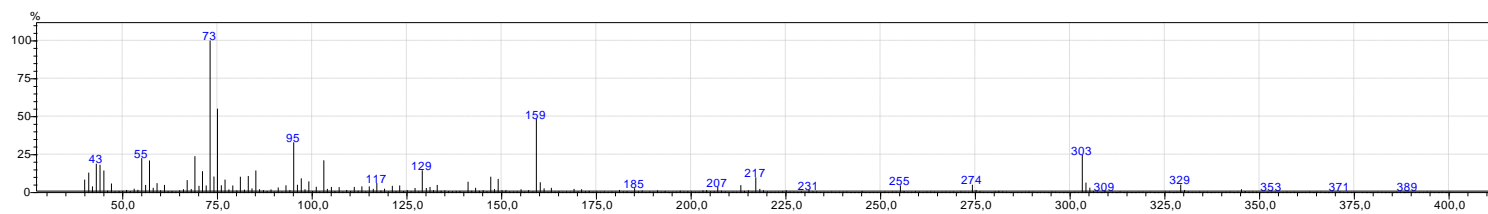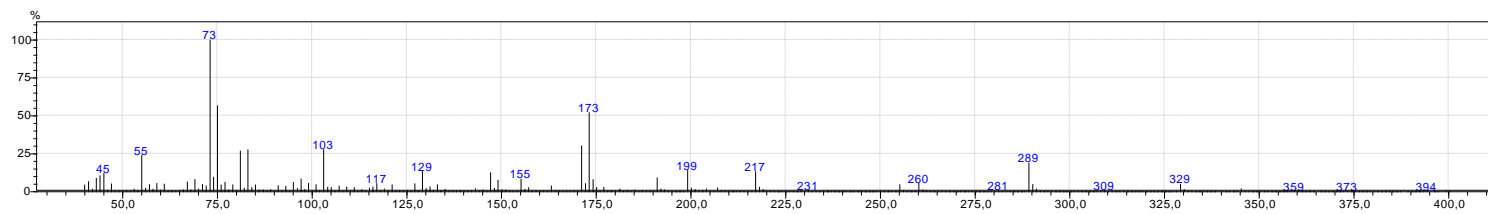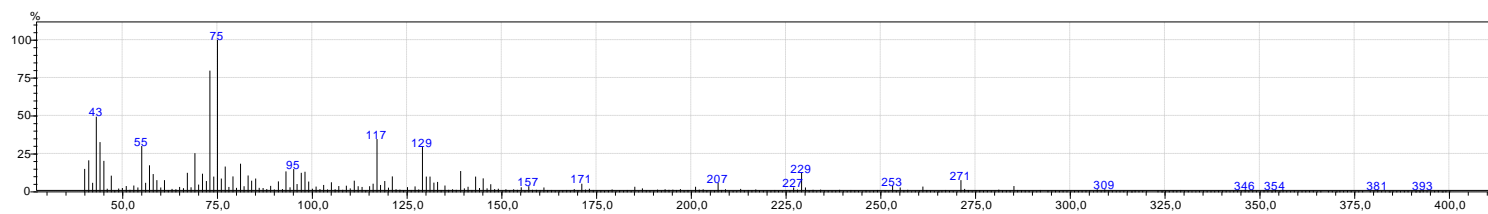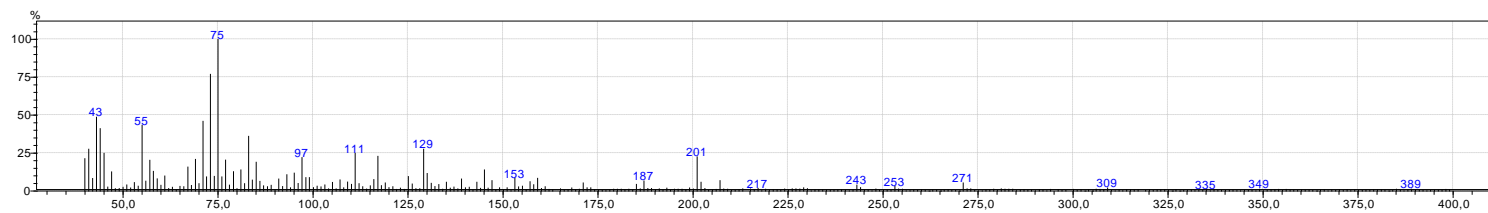

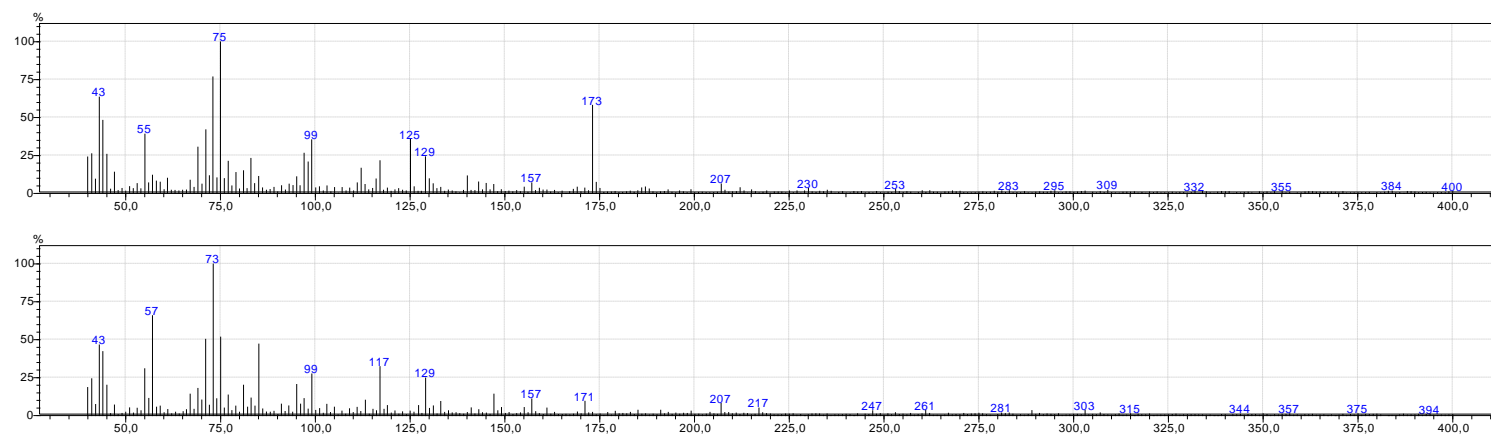

**Figure S35:** GC and MS chromatograms of conversion of **26**. Reactions were conducted in 50 mM sodium phosphate buffer pH 7.0 with 2 mM  $\text{MgCl}_2$ , 1 mM substrate, 4 mM hydrogen peroxide, 1.3  $\mu\text{M}$  *AbrUPO*, 8 mM ascorbate at 25 °C and 600 rpm for 180 min. MS chromatograms of **26** (6.550 min),  $\omega$ -1 (9.330 min),  $\omega$ -2 (9.171 min),  $\omega$ -3 (8.908 min),  $\omega$ -4 (8.738 min),  $\omega$ -5 (8.644 min),  $\omega$ -6 (8.547min),  $\omega$ -7 (8.322 min),  $\omega$ -8 (8.244 min) and  $\gamma$  (10.997 min) in sorted order.

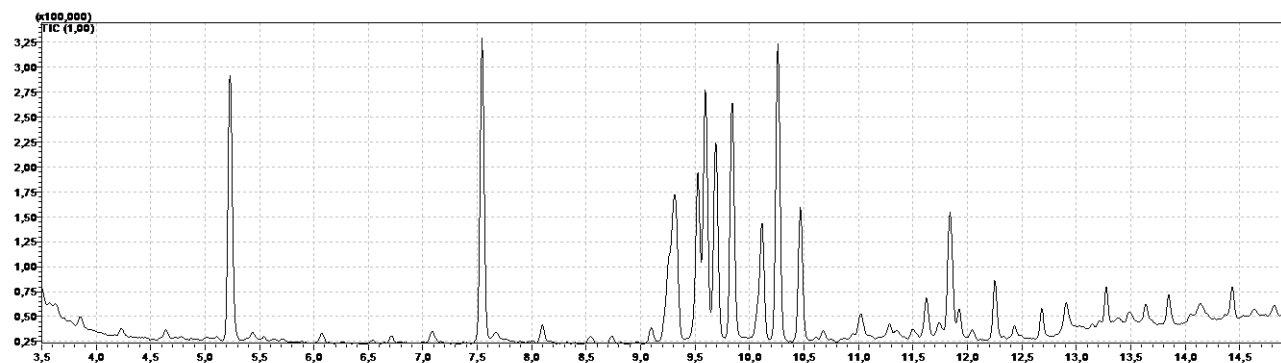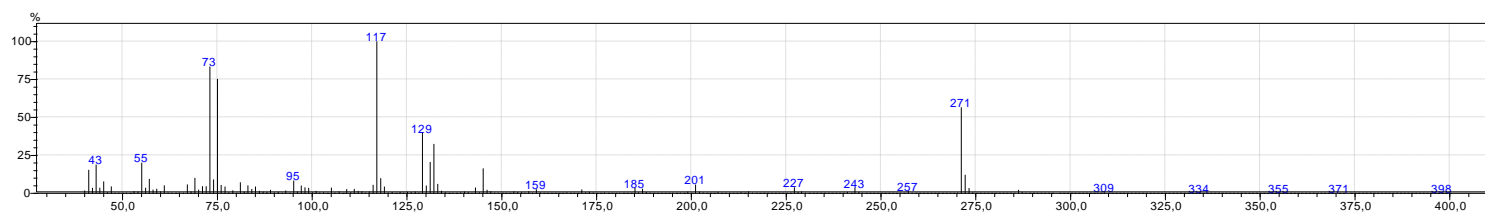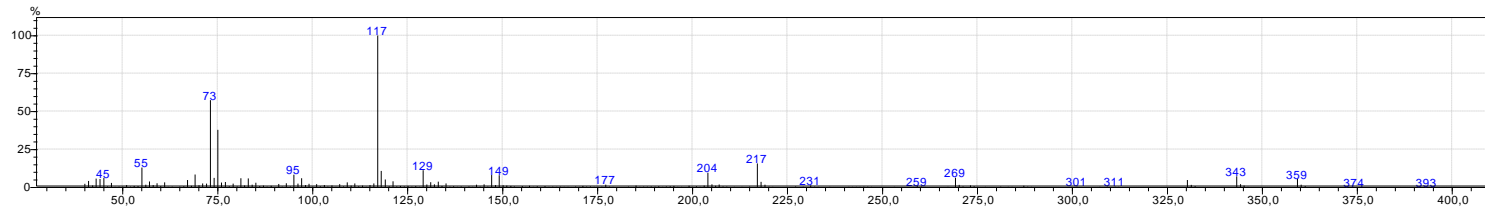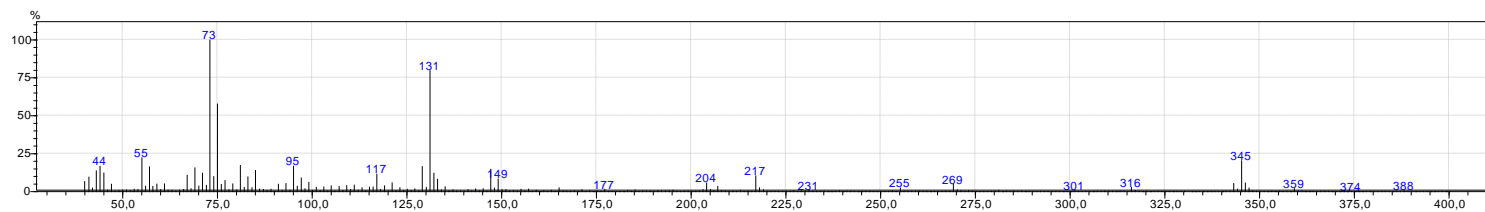

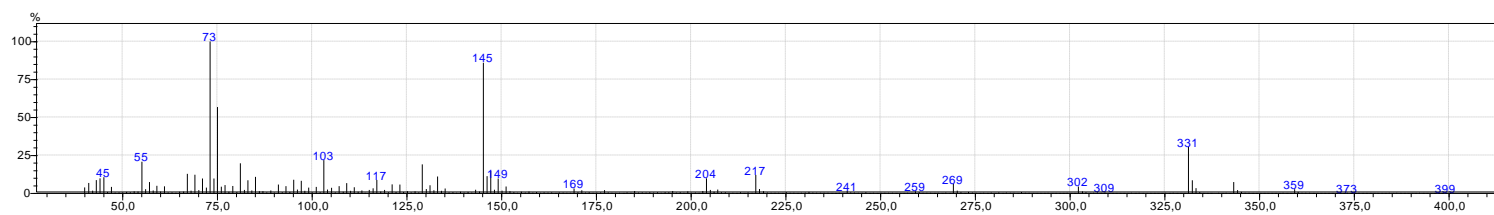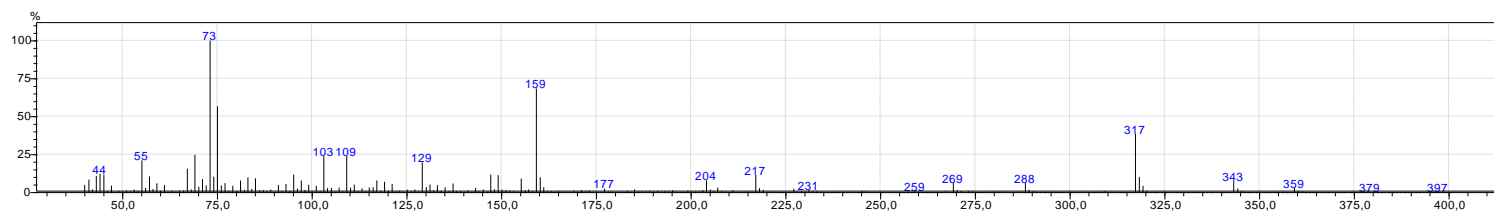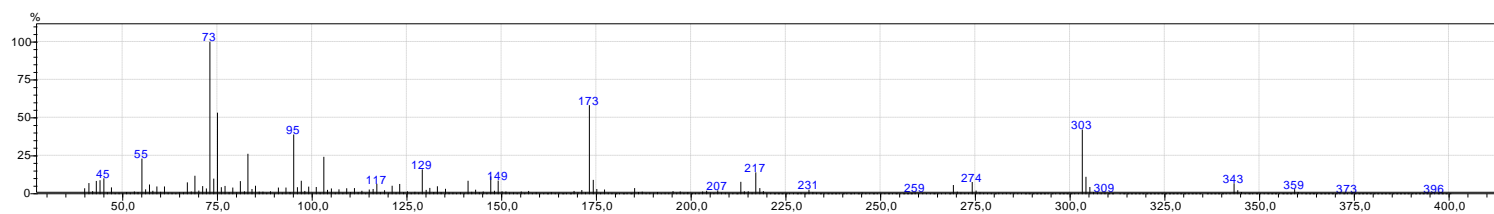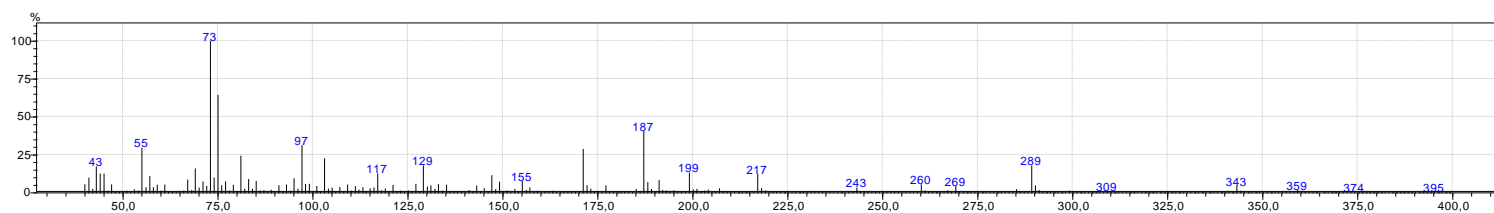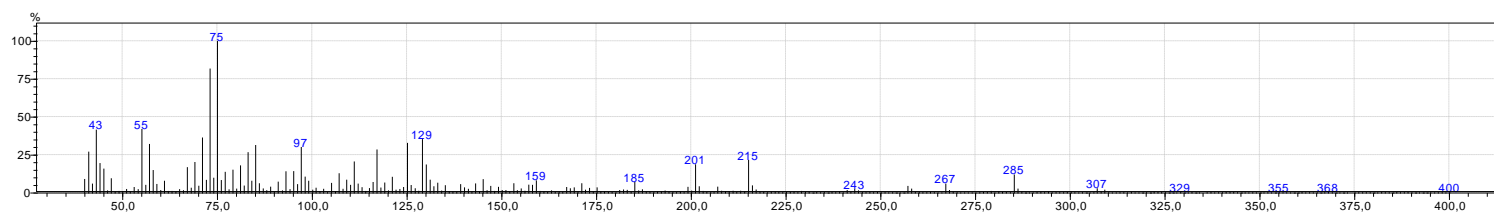

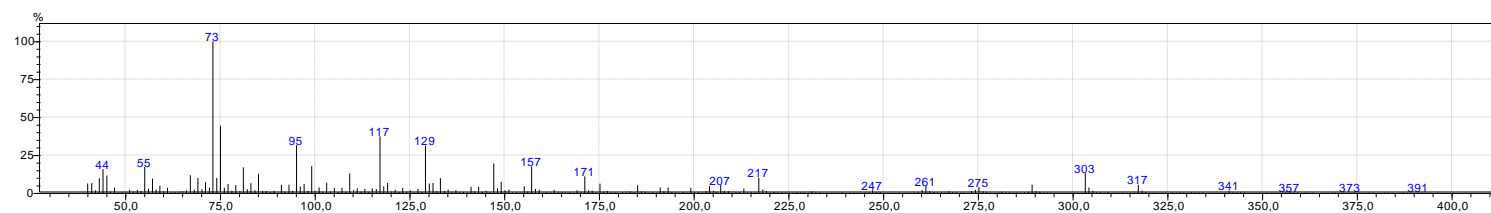

**Figure S36:** GC and MS chromatograms of conversion of **27**. Reactions were conducted in 50 mM sodium phosphate buffer pH 7.0 with 2 mM  $\text{MgCl}_2$ , 1 mM substrate, 4 mM hydrogen peroxide, 1.3  $\mu\text{M}$  *AbrUPO*, 8 mM ascorbate at 25 °C and 600 rpm for 180 min. MS chromatograms of **27** (7.543 min),  $\omega$ -1 (10.263 min),  $\omega$ -2 (10.109 min),  $\omega$ -3 (9.850 min),  $\omega$ -4 (9.696 min),  $\omega$ -5 (9.598 min),  $\omega$ -6 (9.531 min),  $\omega$ -7 (9.313 min) and  $\gamma$  (11.845 min) in sorted order.

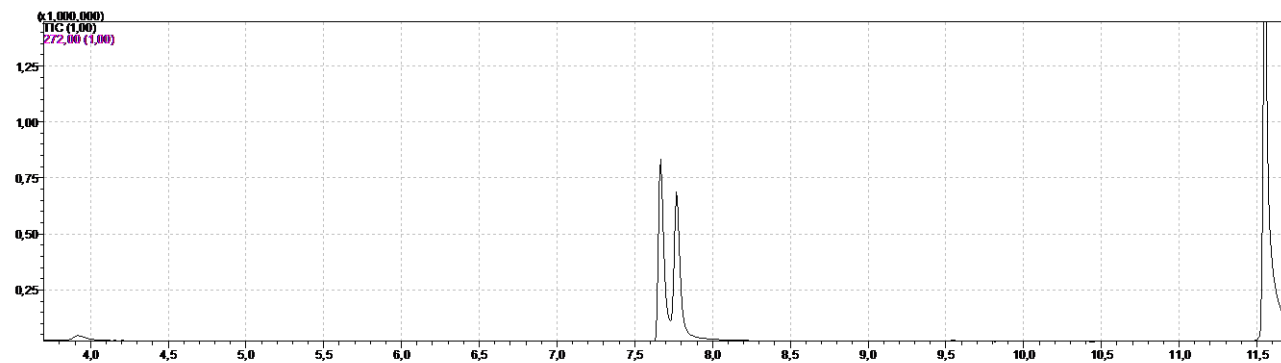

**Figure S37:** GC and MS chromatograms of conversion of **1**. Reactions were conducted in 50 mM sodium phosphate buffer pH 7.0 with 2 mM  $\text{MgCl}_2$ , 1 mM substrate, 4 mM hydrogen peroxide, 1.3  $\mu\text{M}$  PaDa-I, 8 mM ascorbate at 25 °C and 600 rpm for 180 min.

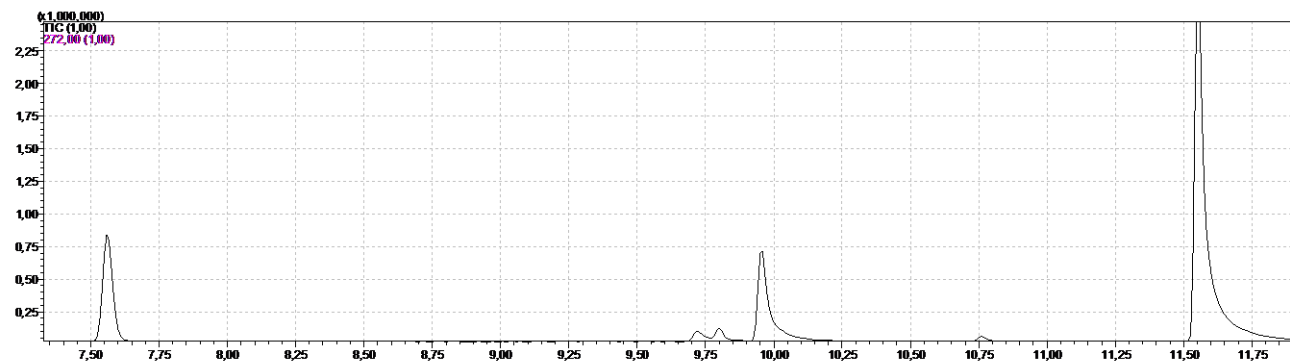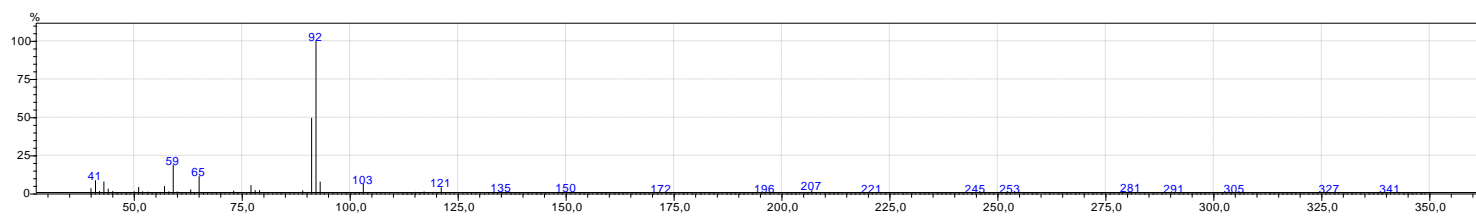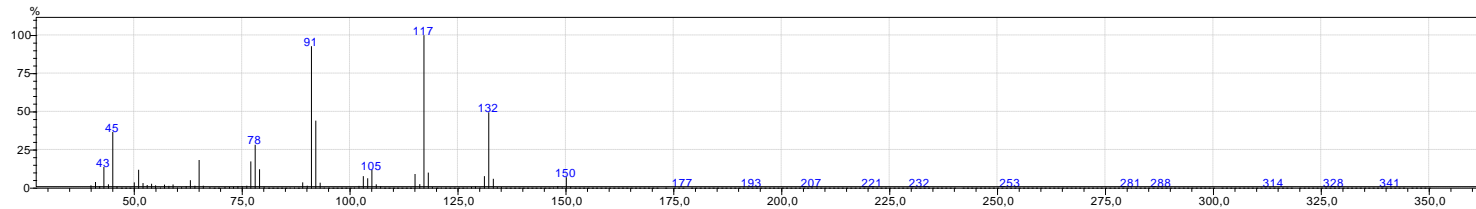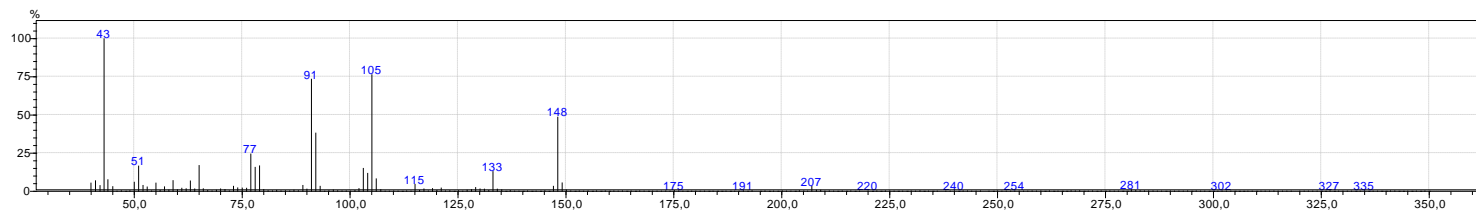

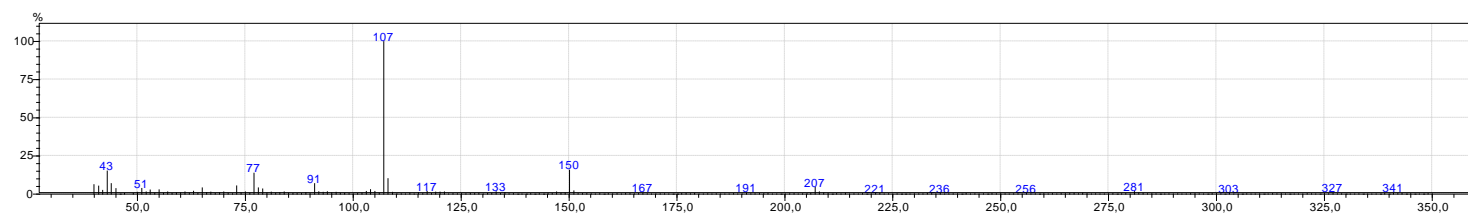

**Figure S38:** GC and MS chromatograms of conversion of **3**. Reactions were conducted in 50 mM sodium phosphate buffer pH 7.0 with 2 mM  $\text{MgCl}_2$ , 1 mM substrate, 4 mM hydrogen peroxide, 1.3  $\mu\text{M}$  PaDa-I, 8 mM ascorbate at 25 °C and 600 rpm for 180 min. MS chromatograms of **3f** (9.720 min), **3g** (9.955 min), **3h** (9.800 min) and **3i** (10.761 min) in sorted order.

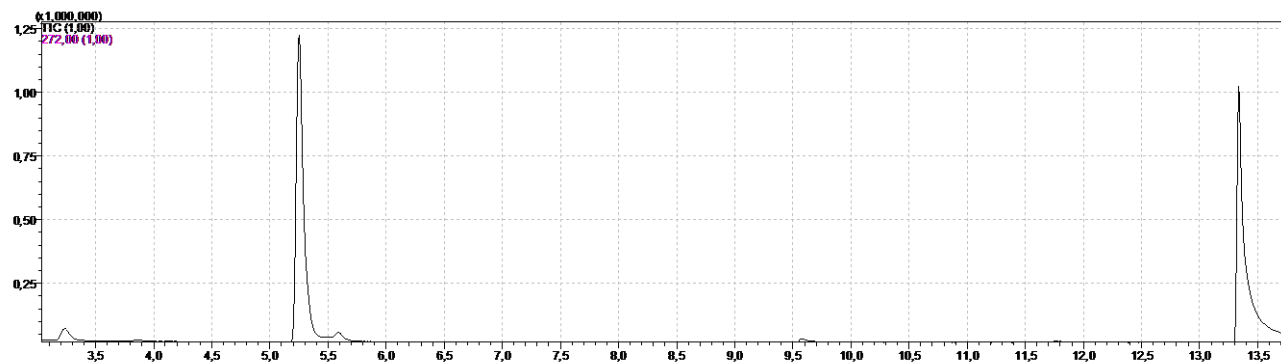

**Figure S39:** GC and MS chromatograms of conversion of **4**. Reactions were conducted in 50 mM sodium phosphate buffer pH 7.0 with 2 mM  $\text{MgCl}_2$ , 1 mM substrate, 4 mM hydrogen peroxide, 1.3  $\mu\text{M}$  PaDa-I, 8 mM ascorbate at 25 °C and 600 rpm for 180 min.

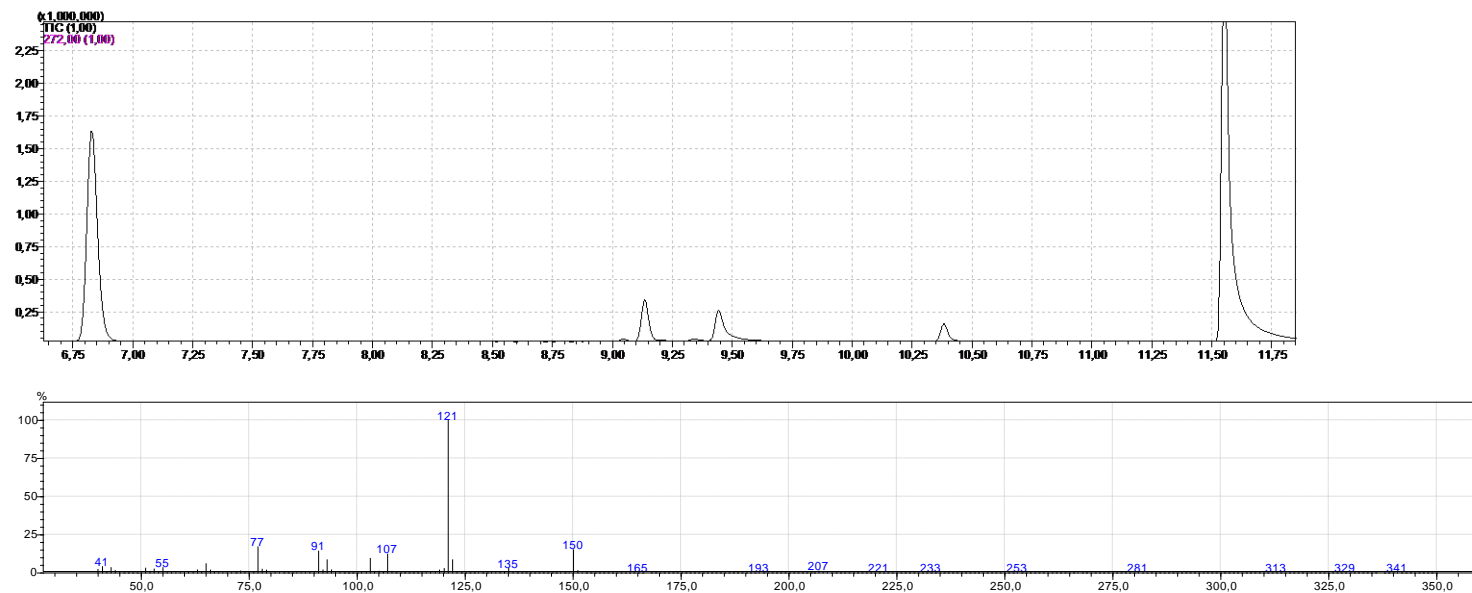

**Figure S40:** GC and MS chromatograms of conversion of **5**. Reactions were conducted in 50 mM sodium phosphate buffer pH 7.0 with 2 mM  $\text{MgCl}_2$ , 1 mM substrate, 4 mM hydrogen peroxide, 1.3  $\mu\text{M}$  PaDa-I, 8 mM ascorbate at 25 °C and 600 rpm for 180 min. MS chromatogram of **5f** (10.383 min).

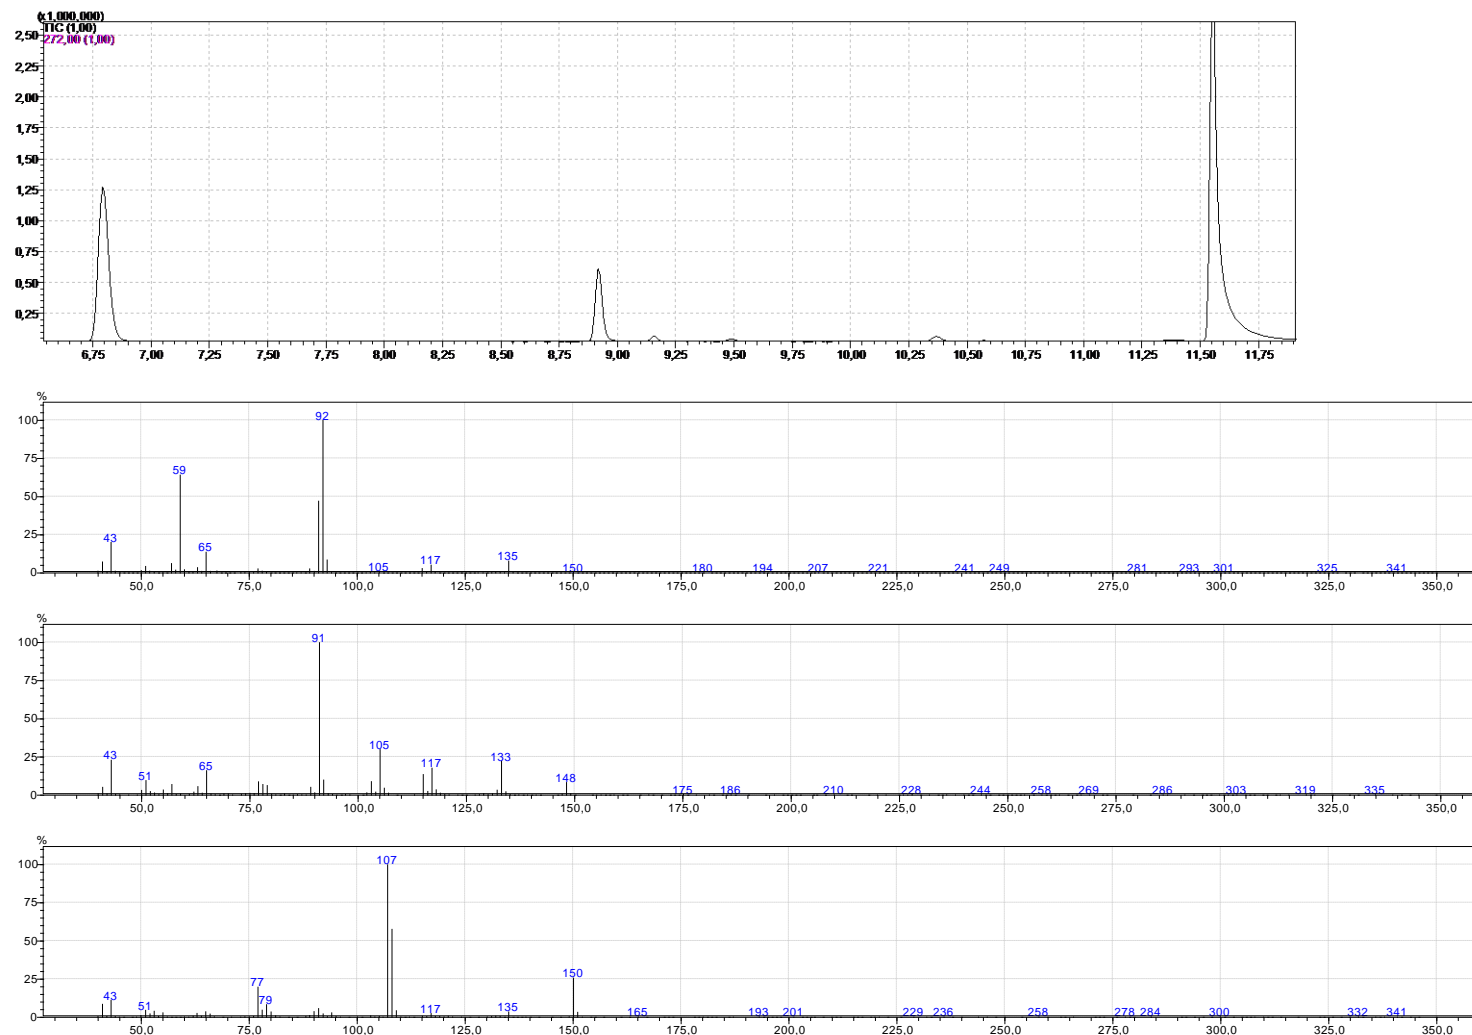

**Figure S41:** GC and MS chromatograms of conversion of **6**. Reactions were conducted in 50 mM sodium phosphate buffer pH 7.0 with 2 mM  $\text{MgCl}_2$ , 1 mM substrate, 4 mM hydrogen peroxide, 1.3  $\mu\text{M}$  PaDa-I, 8 mM ascorbate at 25 °C and 600 rpm for 180 min. MS chromatograms of **6e** (8.919 min), **6f** (9.157 min) and **6g** (10.367 min).

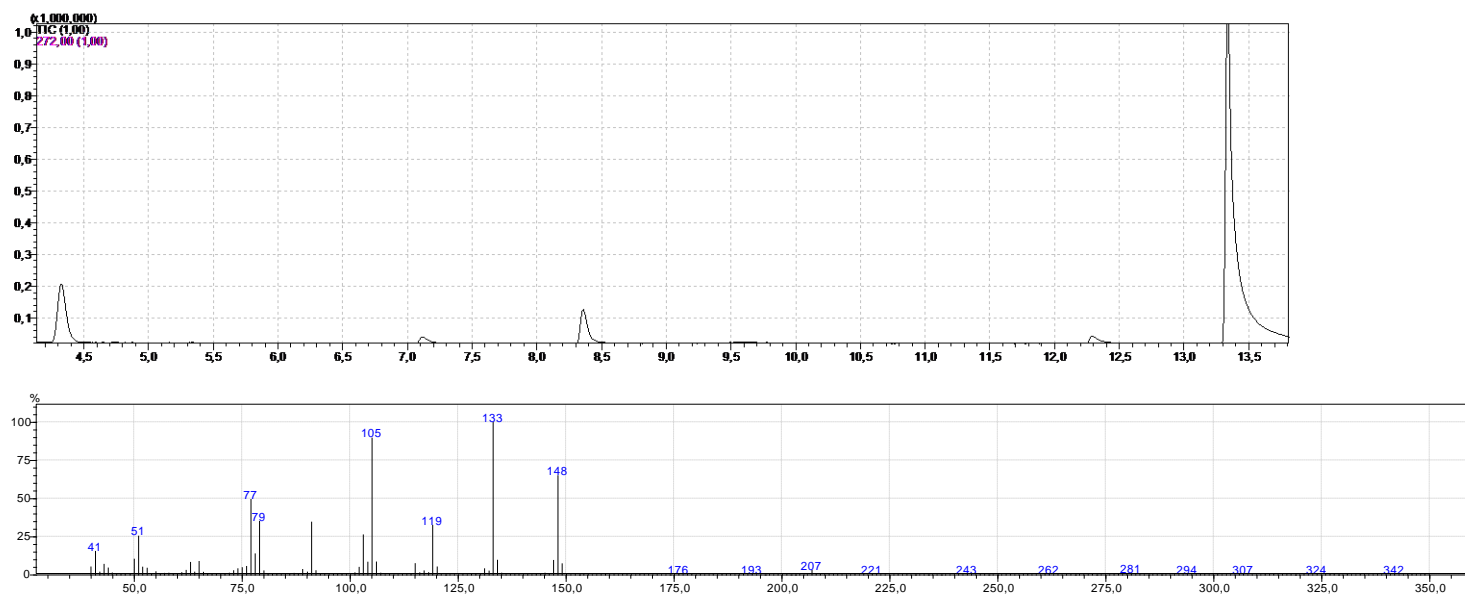

**Figure S42:** GC and MS chromatograms of conversion of **7**. Reactions were conducted in 50 mM sodium phosphate buffer pH 7.0 with 2 mM  $\text{MgCl}_2$ , 1 mM substrate, 4 mM hydrogen peroxide, 1.3  $\mu\text{M}$  PaDa-I, 8 mM ascorbate at 25 °C and 600 rpm for 180 min. MS chromatogram of **7e** (8,358 min).

## 4 References

1. T. Hilberath, L. M. Windeln, D. Decembrino, P. Le-Huu, F. L. Bilsing and V. B. Urlacher, *ChemCatChem*, 2020, **12**, 1710-1719.
2. P. Molina-Espeja, S. Ma, D. M. Mate, R. Ludwig and M. Alcalde, *Enzyme Microb Technol*, 2015, **73-74**, 29-33.
3. S. Bormann, H. Kellner, J. Hermes, R. Herzog, R. Ullrich, C. Liers, R. Ulber, M. Hofrichter and D. Holtmann, *Antioxidants* 2022, **11**.
4. C. Dolge, A. Sass, G. Kayser, R. Ullrich and M. Hofrichter, *BIOspektrum, special issue of Proc VAAM (Association for General and Applied Microbiology) Annu. Confer., Karlsruhe*, 2011, 3-6.
5. J. Kiebitz, K. U. Schmidtke, J. Zimmermann, H. Kellner, N. Jehmlich, R. Ullrich, D. Zander, M. Hofrichter and K. Scheibner, *ChemBioChem*, 2017, **18**, 563-569.
6. D. H. Anh, R. Ullrich, D. Benndorf, A. Svatos, A. Muck and M. Hofrichter, *Appl. Environ. Microbiol.*, 2007, **73**, 5477-5485.
7. L. Rotilio, A. Swoboda, K. Ebner, C. Rinnofer, A. Glieder, W. Kroutil and A. Mattevi, *ACS Catal*, 2021, **11**, 11511-11525.
8. G. Grobe, R. Ullrich, M. J. Pecyna, D. Kapturska, S. Friedrich, M. Hofrichter and K. Scheibner, *AMB Express*, 2011, **1**, 31.
